# Supplementary material for: A Survey of Copy Number Variation in the Porcine Genome Detected From Whole-Genome Sequence
Source: Front Genet. 2019 Aug 16;10:737. doi: 10.3389/fgene.2019.00737 (PMC6707380; doi:10.3389/fgene.2019.00737)
Supplement: Table S4 — Distribution of CNVR in individual animals. [file Table_4.xlsx]

## Sheet: Sheet1
Animal ID	# CNVR	% Genome Covered by CNVR	Genomic Coverage (x)
199590090	209	0.000490096	19.85
199590172	231	0.000864171	18.66
199590201	198	0.000547316	13.11
199590673	235	0.000780792	14.99
199690016	253	0.000896054	20.69
199690232	185	0.000751359	10.14
199691212	189	0.00073057	11.86
199692650	119	0.000347824	7.43
199790081	234	0.000795617	19.48
199790143	112	0.00066671	12.02
199790201	197	0.000515108	12.45
199790341	244	0.000827546	24.26
199890099	129	0.000340529	13.02
199890402	212	0.000656429	16.46
199890871	193	0.000615489	21.61
199990098	168	0.000509852	12.06
199990325	171	0.000413695	15.33
199992411	216	0.000704422	18.65
200090056	230	0.000525923	21.04
200090063	171	0.000394461	12.76
200090067	187	0.00061737	13.91
200090973	122	0.000452267	10.31
200090989	142	0.000392778	9.17
200091122	106	0.00025886	8.16
199826007	28	8.05125e-05	3.61
199926002	2	5.60104e-06	2.13
199927704	0	0	0.97
199928701	22	0.000214179	3.35
199931304	1	2.72496e-06	1.33
199957902	8	3.46632e-05	2.18
199960401	6	1.67226e-05	2.19
199965205	8	4.09767e-05	2.5
199967004	57	0.000298756	4.82
199967505	81	0.000374717	6.6
200022801	32	0.000279852	3.36
200023005	13	3.83298e-05	2.16
200024104	51	0.000136332	4.09
200025104	120	0.000496567	7.35
200027202	52	0.000290859	5.12
200028301	96	0.00040914	7.2
200032302	88	0.000443163	7.93
200033301	12	0.000187415	2.92
200033702	36	9.76117e-05	3.75
200034604	4	1.1108e-05	1.93
200035704	2	1.40281e-05	1.53
200037101	8	1.65912e-05	1.9
200040902	6	1.31288e-05	2.28
200041704	6	0.000170474	2.27
199924002	62	0.000363803	4.44
199927206	53	0.000292374	4.82
199928501	17	7.18469e-05	2.59
199930906	21	6.07372e-05	2.89
199931502	55	0.000310168	4.83
199959504	26	0.000221925	3.15
199961002	35	0.000243127	4.08
199965303	10	4.95249e-05	2.21
199967101	42	0.000272538	4.1
199968602	138	0.000560644	7.73
200023003	98	0.000433258	7.13
200023503	6	0.000172008	1.69
200024603	39	0.000107708	3.84
200026905	38	0.000134562	4.21
200028206	131	0.000509222	7.93
200028502	22	0.000228985	3.07
200032502	9	4.66553e-05	2.92
200033302	9	3.92808e-05	2.16
200033802	42	0.000286656	3.66
200035402	8	0.00018346	2.09
200036302	12	2.66033e-05	3.54
200037403	56	0.000189903	4.94
200041103	1	3.00789e-06	2.62
200042005	1	3.18446e-06	1.7
200418906	173	0.000343652	14.54
200419203	216	0.000823185	18.44
200420107	229	0.000903485	15.74
200420605	211	0.000887379	22.49
200421001	211	0.000526222	15.46
200421705	5	3.13301e-05	3.43
200422304	207	0.00085299	15.58
200422804	203	0.00049349	25.27
200424601	174	0.000438977	14.91
200424608	168	0.00041788	9.81
200425501	211	0.000742523	17.65
200425606	217	0.000863355	22.31
200426001	185	0.000683786	17.66
200426201	218	0.000670905	15.73
200426904	7	0.000172047	3.87
200427302	216	0.000767345	21.58
200427310	177	0.000498761	17.98
200427908	245	0.000862816	21.63
200428105	200	0.000691726	18.41
200428204	283	0.00114242	20.48
200428406	255	0.00121365	23.66
200428504	173	0.000597911	17.43
200429709	157	0.000595463	18.36
200430203	200	0.000759501	18.11
200521308	207	0.000794913	20.92
200522204	205	0.000705643	17.09
200523008	279	0.000710895	18.54
200523107	234	0.000852564	23.97
200523408	251	0.000562908	19.68
200523706	230	0.000884447	21.87
200524107	210	0.000710047	18.03
200524306	242	0.00130799	26.94
200524508	348	0.000899312	26.68
200524904	248	0.000840366	26.39
200526912	258	0.000920126	27.28
200528203	162	0.000602901	18.94
200622604	36	0.000262379	5.76
200631708	14	4.8982e-05	3.42
200721506	18	4.89114e-05	4.92
200821404	184	0.000603826	24.65
200825105	20	0.000209576	5.42
200626508	136	0.000597845	12.77
200623005	85	0.00035901	6.96
200623706	81	0.000398986	6.39
200624009	6	0.000166047	1.86
200625409	207	0.0009139	24.02
200626004	234	0.000961812	23.21
200626207	21	0.000205176	3.1
200627009	11	0.000186671	1.89
200627806	188	0.000741286	27.29
200630706	219	0.00103148	28.56
200718805	190	0.000756513	24.32
200718808	99	0.000494278	7.26
200631203	201	0.000694301	23.37
200718912	246	0.00109875	26.55
200927107	178	0.000568281	13.56
200932811	199	0.000735945	14.99
200721705	193	0.000694508	15.08
200821601	242	0.000814875	29.31
200825705	234	0.000753232	24.77
200927206	215	0.00077209	25.24
200933208	260	0.000978199	29.64
200727611	182	0.000649877	25.51
200719208	227	0.000871448	26.08
200819704	228	0.00101522	26.66
200719504	154	0.00070414	12.64
200719809	238	0.000933801	29.9
200720007	184	0.000623339	16.11
200720308	181	0.000653761	18.36
200720505	209	0.000890157	22.06
200720606	208	0.000754005	24.07
200720912	233	0.00094467	24.64
200819905	226	0.000745405	14.33
200820008	164	0.000618091	14.09
200820206	117	0.000447251	11.85
200820408	125	0.000533203	11.75
200820504	205	0.000709753	25
200820708	180	0.000565024	12.58
200821009	91	0.000421718	5.51
200821101	63	0.000374611	11.91
200821602	140	0.000555681	10.61
200821803	109	0.000487968	6.4
200823108	143	0.000671299	10.34
200823603	168	0.000615483	14.96
200823605	162	0.000411072	14.85
200824011	191	0.000806678	22.29
200824012	135	0.000496793	11.47
200824504	155	0.000594371	12.85
200824509	90	0.000485366	6.79
200825104	105	0.000417318	7.09
200827705	55	0.0001289	4.53
200834106	210	0.000959422	17.2
200924505	131	0.000424097	9.5
200924906	231	0.000805168	21
200925909	203	0.000738163	14.7
200926609	145	0.000594935	12.45
200926707	43	0.000136233	4.86
200927006	149	0.000486346	14.68
200927307	157	0.000622427	13.52
200928405	151	0.000720325	7.87
200930305	202	0.00077104	17.58
200930309	93	0.000378094	5.86
200930810	163	0.000577274	12.93
200931004	120	0.000477698	8.61
200931906	177	0.000743952	25.93
200932410	216	0.000884674	31.13
200933509	202	0.00063781	20.84
200933609	175	0.000722146	17.27
200934309	140	0.000676515	12.64
201512802	194	0.000526432	15.95
201512806	169	0.000592661	15.38
201513212	208	0.000957568	17.53
201513302	172	0.000573842	16.35
201513503	237	0.000871822	16.98
201514007	230	0.000650776	19.48
201526512	134	0.000559123	15.31
201526902	127	0.000596098	15.61
201527003	214	0.000768736	17.43
201527206	240	0.000795475	16.35
201527312	201	0.000681096	17.36
201528604	239	0.000893466	19.7
201529301	269	0.00115007	16.23
201529904	188	0.000618343	11.26
201541912	214	0.00062132	15.69
201542308	240	0.000870891	16.94
201542401	248	0.0008879	16.26
201542702	230	0.000690347	15.72
201543206	247	0.000920457	16
201543707	261	0.000817207	17.03
201544001	270	0.000988496	15.79
201544102	273	0.000802025	16.6
201556603	239	0.000642146	16.16
201556810	226	0.000834486	16.99
201556811	198	0.000608941	16.88
201557009	225	0.000663527	15.65
201558001	198	0.000759711	11.36
201558113	213	0.000601427	15.27
201559602	199	0.000819848	17.5
59879518	280	0.000923006	18.56
60278059	274	0.000712583	21.66
63016115	264	0.00121607	16.45
97711003	213	0.000723216	16.56
104004001	227	0.000715488	12.27
106863002	193	0.000785141	11.76
116737012	244	0.000623075	16.94
118822010	224	0.000955357	15.04
127044008	194	0.000857693	15.59
280550413	239	0.000828296	17.56
280570313	172	0.000608415	10.2
280761713	244	0.000747362	15.27
30077Z	247	0.000702855	11.99
34720Y	255	0.000971927	19.27
53648U	203	0.000697105	15.4
62069368	258	0.00082752	19.74
64630526	250	0.000891017	14.8
64635058	253	0.000840061	17.74
483170006	281	0.000924649	17.6
500154003	259	0.00066405	16.36
568349004	241	0.000857232	19.29
571376007	218	0.000783012	11.77
574119010	242	0.000786993	14.76
576747012	239	0.000906024	15.15
3130211713	251	0.000718429	11.71
3140134713	253	0.000809894	16.5
6150819115	184	0.000475266	9.23
33361Y	168	0.000560953	8.92
34725X	0	0	9.79
35954X	177	0.000676851	12.16
