# Supplementary material for: A Survey of Copy Number Variation in the Porcine Genome Detected From Whole-Genome Sequence
Source: Front Genet. 2019 Aug 16;10:737. doi: 10.3389/fgene.2019.00737 (PMC6707380; doi:10.3389/fgene.2019.00737)
Supplement: Table S6 — Results from GO enrichment analysis. [file Table_6.xlsx]

## Sheet: Biological Process
GO Term	# Annotated Sus scrofa Genes	# CNV Genes	Expected # CNV Genes	Over (+) or Under (-) Represented	FDR-corrected P-value
developmental process (GO:0032502)	3508	219	146.78	+	4.23e-06
nervous system development (GO:0007399)	1377	107	57.62	+	4.7e-06
multicellular organism development (GO:0065007)	3080	195	128.87	+	6.85e-06
regulation of cell projection organization (GO:0031344)	378	44	15.82	+	6.93e-06
anatomical structure development (GO:0048856)	3360	212	140.59	+	7.19e-06
regulation of plasma membrane bounded cell projection organization (GO:0120035)	374	44	15.65	+	7.62e-06
biological process (GO:0008150)	16288	759	681.53	+	1.99e-05
detection of chemical stimulus involved in sensory perception (GO:0050907)	1684	30	70.46	-	2.27e-05
system development (GO:0048731)	2788	177	116.66	+	2.37e-05
regulation of neuron projection development(GO:0010975)	261	34	10.92	+	2.69e-05
detection of chemical stimulus involved in sensory perception of smell (GO:0050911)	1669	30	69.84	-	3.08e-05
regulation of nervous system development (GO:0051960)	583	55	24.39	+	4.61e-05
detection of chemical stimulus (GO:0009593)	1704	32	71.3	-	6.16e-05
detection of stimulus involved in sensory perception (GO:0050906)	1721	33	72.01	-	8.7e-05
neurogenesis (GO:0022008)	1044	81	43.68	+	0.000103
regulation of neurogenesis (GO:0050767)	493	48	20.63	+	0.000104
regulation of localization (GO:0032879)	1873	126	78.37	+	0.000109
detection of stimulus (GO:0051606)	1786	36	74.73	-	0.000158
regulation of cell morphogenesis (GO:0022604)	282	33	11.8	+	0.000172
cellular developmental process (GO:0048869)	2276	145	95.23	+	0.000199
cell differentiation (GO:0030154)	2202	141	92.14	+	0.000215
positive regulation of nervous system development (GO:0051962)	316	35	13.22	+	0.00023
sensory perception of chemical stimulus (GO:0007606)	1725	35	72.18	-	0.000236
sensory perception of smell (GO:0007608)	1690	34	70.71	-	0.00024
generation of neurons (GO:0048699)	968	75	40.5	+	0.000243
localization (GO:0051179)	3574	206	149.54	+	0.000487
regulation of neuron differentiation (GO:0045664)	379	38	15.86	+	0.000651
regulation of cell morphogenesis involved in differentiation (GO:0010769)	171	23	7.16	+	0.000823
regulation of ion transmembrane transport (GO:0034765)	281	31	11.76	+	0.00087
regulation of trans-synaptic signaling (GO:0099177)	254	29	10.63	+	0.000904
modulation of chemical synaptic transmission (GO:0050804)	254	29	10.63	+	0.000934
regulation of cell differentiation (GO:0045595)	1217	86	50.92	+	0.000997
regulation of biological quality (GO:0065008)	2612	157	109.29	+	0.0011
regulation of cell development (GO:0045595)	603	51	25.23	+	0.0012
positive regulation of neurogenesis (GO:0050769)	261	29	10.92	+	0.00135
regulation of cation transmembrane transport (GO:1904062)	180	23	7.53	+	0.00144
cellular component organization (GO:0016043)	3334	191	139.5	+	0.00147
anatomical structure morphogenesis (GO:0009653)	1500	100	62.76	+	0.00148
cellular component organization or biogenesis (GO:0071840)	3415	194	142.89	+	0.00189
regulation of cellular component organization (GO:0051128)	1668	108	69.79	+	0.00201
regulation of transmembrane transport (GO:0034762)	344	34	14.39	+	0.00208
regulation of release of sequestered calcium ion into cytosol (GO:0051279)	47	11	1.97	+	0.00217
regulation of synapse organization (GO:0050807)	147	20	6.15	+	0.00218
regulation of developmental process (GO:0050793)	1819	115	76.11	+	0.00252
regulation of synapse structure or activity (GO:0050803)	149	20	6.23	+	0.00253
regulation of calcium ion transport into cytosol (GO:0010522)	58	12	2.43	+	0.00253
positive regulation of cell development (GO:0010720)	321	32	13.43	+	0.00268
brain development (GO:0007420)	433	39	18.12	+	0.00285
positive regulation of developmental process (GO:0051094)	972	70	40.67	+	0.00316
regulation of cellular component movement (GO:0051270)	686	54	28.7	+	0.00318
anterograde trans-synaptic signaling (GO:0098916)	168	21	7.03	+	0.00323
animal organ development (GO:0048513)	2082	127	87.12	+	0.00346
chemical synaptic transmission (GO:0007268)	168	21	7.03	+	0.00349
positive regulation of cell projection organization (GO:0031346)	195	23	8.16	+	0.00351
regulation of multicellular organismal procee (GO:0051239)	2199	133	92.01	+	0.00353
trans-synaptic signaling (GO:0099537)	181	22	7.57	+	0.00355
positive regulation of neuron projection development (GO:0010976)	129	18	5.4	+	0.00355
regulation of calcium ion transmembrane transport (GO:1903169)	83	14	3.47	+	0.00378
head development (GO:0060322)	473	41	19.79	+	0.00378
synaptic signaling (GO:0099536)	184	22	7.7	+	0.00394
regulation of cell motility (GO:2000145)	632	50	26.44	+	0.00481
positive regulation of neuron differentiation (GO:0045666)	189	22	7.91	+	0.00567
positive regulation of synaptic transmission (GO:0050806)	76	13	3.18	+	0.00591
regulation of locomotion (GO:0040012)	692	53	28.95	+	0.00595
microtubule-based process (GO:0007017)	435	38	18.2	+	0.00598
regulation of axonogenesis (GO:0050770)	99	15	4.14	+	0.006
intracellular signal transduction (GO:0035556)	909	65	38.03	+	0.00603
macromolecule localization (GO:0033036)	1343	88	56.19	+	0.00604
cell development (GO:0048468)	1096	75	45.86	+	0.00607
regulation of multicellular organismal development (GO:2000026)	1403	91	58.7	+	0.00618
movement of cell or subcellular component (GO:0006928)	875	63	36.61	+	0.0062
regulation of metal ion transport (GO:0010959)	221	24	9.25	+	0.00638
regulation of cell migration (GO:0030334)	594	47	24.85	+	0.00705
regulation of ion transport (GO:0043269)	393	35	16.44	+	0.00716
regulation of cytosolic calcium ion concentration (GO:0051480)	140	18	5.86	+	0.00721
neuron projection morphogenesis (GO:0048812)	269	27	11.26	+	0.00764
central nervous system development (GO:0007417)	563	45	23.56	+	0.00771
biological regulation (GO:0065007)	10343	494	432.78	+	0.00826
negative regulation of exocytosis (GO:0045920)	22	7	0.92	+	0.00858
positive regulation of cell differentiation (GO:0045597)	654	50	27.36	+	0.0086
plasma membrane bounded cell projection morphogenesis (GO:0120039)	272	27	11.38	+	0.00861
regulation of cell-substrate adhesion (GO:0010810)	143	18	5.98	+	0.00862
cell projection morphogenesis (GO:0048858)	273	27	11.42	+	0.00893
peptide biosynthetic process (GO:0043043)	600	8	25.11	-	0.00985
phosphorus metabolic process (GO:0006793)	1552	97	64.94	+	0.011
positive regulation of cell motility (GO:2000147)	359	32	15.02	+	0.0128
translation (GO:0006412)	589	8	24.65	+	0.0132
regulation of intracellular signal transduction (GO:1902531)	1210	79	50.63	+	0.0135
cellular process (GO:0009987)	11884	556	497.26	+	0.014
cellular localization (GO:0051641)	1310	84	54.81	+	0.0143
peptide metabolic process (GO:0006518)	659	10	27.57	-	0.0145
neuron development (GO:0048666)	515	41	21.55	+	0.0151
protein localization to membrane (GO:0072657)	238	24	9.96	+	0.0152
positive regulation of cellular component movement (GO:0051272)	366	32	15.31	+	0.0166
phosphate-containing compound metabolic process (GO:0006796)	1536	95	64.27	+	0.0169
neuron projection development (GO:0031175)	401	34	16.78	+	0.0178
regulation of GTPase activity (GO:0043087)	306	28	12.8	+	0.0203
cell part morphogenesis (GO:0032990)	291	27	12.18	+	0.0211
peptidyl-tyrosine phosphorylation (GO:0018108)	116	15	4.85	+	0.022
synapse organization (GO:0050808)	157	18	6.57	+	0.0223
establishment of localization (GO:0051234)	2747	153	114.94	+	0.0226
neuron differentiation (GO:0030182)	634	47	26.53	+	0.0228
positive regulation of cellular component organization (GO:0051130)	800	56	33.47	+	0.0234
regulation of cell adhesion (GO:0030155)	477	38	19.96	+	0.0236
glycoprotein metabolic process (GO:0009100)	233	23	9.75	+	0.0251
cellular nitrogen compound biosynthetic process (GO:0044271)	1290	30	53.98	-	0.0257
protein modification process (GO:0036211)	2051	119	85.82	+	0.027
cellular protein modification process (GO:0006464)	2051	119	85.82	+	0.0273
regulation of hydrolase activity (GO:0051336)	845	58	35.36	+	0.0282
negative chemotaxis (GO:0050919)	20	6	0.84	+	0.0291
positive regulation of cell morphogenesis involved in differentiation (GO:0010770)	82	12	3.43	+	0.0292
amide biosynthetic process (GO:0043604)	662	11	27.7	-	0.0294
positive regulation of GTPase activity (GO:0043547)	253	24	10.59	+	0.0299
macromolecule modification (GO:0043412)	2183	125	91.34	+	0.0299
microtubule-based movement (GO:0007018)	163	18	6.82	+	0.03
gene expression (GO:0010467)	1461	36	61.13	-	0.0302
positive regulation of locomotion (GO:0040017)	385	32	16.11	+	0.0322
regulation of calcium ion transport (GO:0051924)	136	16	5.69	+	0.0323
locomotory behavior (GO:0007626)	179	19	7.49	+	0.0325
peptidyl-tyrosine modification (GO:0018212)	123	15	5.15	+	0.0336
protein localization (GO:0008104)	1125	72	47.07	+	0.0355
regulation of cell communication (GO:0010646)	2559	142	107.07	+	0.0383
regulation of cell-subsrate junction assembly (GO:0090109)	40	8	1.67	+	0.0384
regulation of focal adhesion assembly (GO:0051893)	40	8	1.67	+	0.0387
positive regulation of cell migration (GO:0030335)	340	29	14.23	+	0.0389
regulation of transmembrane transporter activity (GO:0022898)	126	15	5.27	+	0.041
protein phosphorylation (GO:0006468)	696	49	29.12	+	0.0423
cellular component morphogenesis (GO:0032989)	498	38	20.84	+	0.0431
regulation of membrane potential (GO:0042391)	262	24	10.96	+	0.0436
phosphorylation (GO:0016310)	924	61	38.66	+	0.0442
regulation of signaling (GO:0023051)	2573	142	107.66	+	0.0458
regulation of small GTPase mediated signal transduction (GO:0051056)	201	20	8.41	+	0.0462

## Sheet: Molecular Function
GO Term	# Annotated Sus scrofa Genes	# CNV Genes	Expected # CNV Genes	Over (+) or Under (-) Represented	FDR-corrected P-value
anion binding (GO:0043168)	2329	160	97.45	+	7.41e-07
binding (GO:0005488)	9924	509	415.24	+	1.13e-06
catalytic activity (GO:0003824)	4618	274	193.23	+	1.19e-06
ion binding (GO:0043167)	4613	270	193.02	+	1.34e-06
olfactory recptor activity (GO:0004984)	1400	20	58.58	-	1.37e-06
drug binding (GO:0008144)	1497	113	62.64	+	1.5e-06
cytoskeletal protein binding (GO:0008092)	665	61	27.83	+	1.1e-06
ATP binding (GO:0005524)	1349	100	56.45	+	1.51e-05
adenyl nucleotide binding (GO:0030554)	1390	102	58.16	+	1.6e-05
adenyl ribonucleotide binding (GO:0032559)	1384	102	57.91	+	1.62e-05
carbohydrate derivative binding (GO:0097367)	1918	129	80.25	+	2.9e-05
ribonucleotide binding (GO:0032553)	1720	118	71.97	+	3.74e-05
small molecule binding (GO:0036094)	2178	141	91.13	+	5.16e-05
catalytic activity, acting on a protein (GO:0140096)	1692	115	70.8	+	7.5e-05
purine ribonucleotide binding (GO:0032555)	1707	115	71.43	+	0.000108
purine nucleotide binding (GO:0017076)	1714	125	71.72	+	0.000123
nucleoside phosphate binding (GO:1901265)	1921	112	80.38	+	0.000123
purine ribonucleoside triphosphate binding (GO:0035639)	1667	125	69.75	+	0.000151
nucleotide binding (GO:0000166)	1921	695	80.38	+	0.000155
molecular function (GO:0003674)	14982	277	626.88	+	0.000159
protein binding (GO:0005515)	4866	262	203.61	+	0.000357
phosphotransferase activity, alcohol as acceptor (GO:0016773)	578	48	24.18	+	0.000783
neurotransmitter receptor activity (GO:0030594)	73	13	3.05	+	0.00149
protein kinase activity (GO:0004672)	492	42	20.59	+	0.00271
transferase activity, transferring phosphorus-containing groups (GO:0016772)	753	57	31.51	+	0.00274
hydrolase activity (GO:0016787)	1980	121	82.85	+	0.0028
guanyl-nucleotide exchange factor activity (GO:0005085)	162	20	6.78	+	0.00294
kinase activity (GO:0016301)	643	50	26.9	+	0.00344
structural constituent of ribosome (GO:0003735)	401	3	16.78	-	0.00415
enzyme binding (GO:0019899)	1443	92	60.38	+	0.0054
protein serine/threonine kinase activity (GO:0004674)	278	27	11.63	+	0.00621
G protein-coupled neurotransmitter receptor activity (GO:0099528)	24	7	1	+	0.00826
G-protein-coupled receptor activity (GO:0004930)	1903	49	79.63	-	0.00934
tubulin binding (GO:0015631)	225	23	9.41	+	0.00953
GTPase binding (GO:0051020)	340	30	14.23	+	0.0122
transferase activity (GO:0016740)	1693	102	70.84	+	0.0159
actin binding (GO:0003779)	309	28	12.93	+	0.0162
glutamate receptor activity (GO:0008066)	20	6	0.84	+	0.0165
phosphoric ester hydrolase activity (GO:0042578)	276	25	11.55	+	0.0217
structural molecule activity (GO:0005198)	714	13	29.88	-	0.0335
cation binding (GO:0043169)	2766	151	115.74	+	0.0389

## Sheet: Cellular Component
GO Term	# Annotated Sus scrofa Genes	# CNV Genes	Expected # CNV Genes	Over (+) or Under (-) Represented	FDR-corrected P-value
neuron part (GO:0097458)	804	78	33.64	+	2.78e-08
synapse (GO:0045202)	656	67	27.45	+	4.91e-08
synapse part (GO:0044456)	472	54	19.75	+	5.02e-08
plasma membrane bounded cell projection (GO:0120025)	1034	88	43.27	+	1.85e-07
cell projection (GO:0042995)	1049	89	43.89	+	2.13e-07
neuron projection (GO:0043005)	522	55	21.84	+	2.31e-07
plasma membrane bounded cell projection part (GO:0120038)	674	65	28.2	+	2.62e-07
cell projection part (GO:0044463)	674	65	28.2	+	3.06e-07
postsynapse (GO:0098794)	291	37	12.18	+	1.11e-06
cellular component (GO:0005575)	15929	740	666.51	+	1.86e-05
synaptic membrane (GO:0097060)	160	23	6.69	+	7.48e-05
cytoskeleton (GO:0005856)	1375	97	57.53	+	7.86e-05
membrane (GO:0016020)	8437	424	353.02	+	0.000207
neuron to neuron synapse (GO:0098984)	142	20	5.94	+	0.000437
cell junction (GO:0030054)	542	47	22.68	+	0.000442
postsynaptic membrane (GO:0045211)	119	18	4.98	+	0.000475
endomembrane system (GO:0012505)	2256	138	94.4	+	0.00048
cytoplasm (GO:0005737)	6881	350	287.92	+	0.000957
plasma membrane part (GO:0044459)	1315	87	55.02	+	0.00202
somatodendritic compartment (GO:0036477)	282	28	11.8	+	0.003
asymmetric synapse (GO:0032279)	128	17	5.36	+	0.0032
postsynaptic density (GO:0014069)	128	17	5.36	+	0.00335
axon (GO:0030424)	256	26	10.71	+	0.00342
postsynaptic specialization (GO:0099572)	146	18	6.11	+	0.00455
ribonucleoprotein complex (GO:1990904)	812	14	33.98	-	0.00481
organelle (GO:0043226)	8614	418	360.43	+	0.00546
intracellular part (GO:0044424)	9713	463	406.42	+	0.00839
intracellular (GO:0005622)	9713	463	406.42	+	0.00869
membrane part (GO:0044425)	7261	356	303.82	+	0.0118
glutamatergic synapse (GO:0098978)	238	23	9.96	+	0.0133
dystrophin-associated glycoprotein complex (GO:0016010)	13	5	0.54	+	0.0134
glycoprotein complex (GO:0090665)	13	5	0.54	+	0.0139
axon part (GO:0033267)	150	17	6.28	+	0.0139
plasma membrane region (GO:0098590)	579	43	24.23	+	0.0142
dendrite (GO:0030425)	181	19	7.57	+	0.0144
ribosome (GO:0005840)	430	5	17.99	-	0.0146
dendritic tree (GO:0097447)	181	19	7.57	+	0.0148
presynapse (GO:0098793)	228	22	9.54	+	0.0155
ciliary part (GO:0044441)	276	25	11.55	+	0.0157
actin cytoskeleton (GO:0015629)	329	28	13.77	+	0.0186
cell part (GO:0044464)	12500	574	523.03	+	0.0229
organelle part (GO:0044422)	5562	277	232.73	+	0.0245
cilum (GO:0005929)	358	29	14.98	+	0.0297
intrinsic component of membrane (GO:0031226)	573	41	23.98	+	0.0316
Golgi apparatus (GO:0005794)	825	54	34.52	+	0.0383
leading edge membrane (GO:0031256)	72	10	3.01	+	0.0389
cell (GO:0005623)	12664	578	529.89	+	0.0389
cell leading edge (GO:0031252)	233	21	9.75	+	0.0393
integral component of plasma membrane (GO:0005887)	532	38	22.26	+	0.0446
cell body (GO:0044297)	190	18	7.95	+	0.0476
intracellular organelle (GO:0043229)	8380	396	350.64	+	0.0484
