# Supplementary material for: A Survey of Copy Number Variation in the Porcine Genome Detected From Whole-Genome Sequence
Source: Front Genet. 2019 Aug 16;10:737. doi: 10.3389/fgene.2019.00737 (PMC6707380; doi:10.3389/fgene.2019.00737)
Supplement: Table S7 — Results from QTL enrichment analysis using QTL from the AnimalQTL Database. [file Table_7.xlsx]

## Sheet: A
CNVR #	Chromosome	Start Position	End Position	QTL(s)
1	1	4290001	4298000	Loin muscle area QTL (38072), Body weight (birth) QTL (826), Loin muscle area QTL (21352), Marbling QTL (38049), Loin muscle area QTL (3221), Muscle moisture percentage QTL (38073), Glucose level QTL (15087), Diameter of angular fibers QTL (2793), Teat number QTL (276), Loin fat percentage QTL (38050)
2	1	4389501	4394500	Loin muscle area QTL (38072), Body weight (birth) QTL (826), Loin muscle area QTL (21352), Marbling QTL (38049), Loin muscle area QTL (3221), Muscle moisture percentage QTL (38073), Glucose level QTL (15087), Diameter of angular fibers QTL (2793), Teat number QTL (276), Loin fat percentage QTL (38050)
3	1	5376001	5401500	Loin muscle area QTL (38072), Body weight (birth) QTL (826), Loin muscle area QTL (21352), Marbling QTL (38049), Loin muscle area QTL (3221), Muscle moisture percentage QTL (38073), Glucose level QTL (15087), Diameter of angular fibers QTL (2793), Teat number QTL (276), Loin fat percentage QTL (38050)
4	1	5399001	5403500	Loin muscle area QTL (38072), Body weight (birth) QTL (826), Loin muscle area QTL (21352), Marbling QTL (38049), Loin muscle area QTL (3221), Muscle moisture percentage QTL (38073), Glucose level QTL (15087), Diameter of angular fibers QTL (2793), Teat number QTL (276), Loin fat percentage QTL (38050)
5	1	5411501	5416500	Loin muscle area QTL (38072), Body weight (birth) QTL (826), Loin muscle area QTL (21352), Marbling QTL (38049), Loin muscle area QTL (3221), Muscle moisture percentage QTL (38073), Glucose level QTL (15087), Diameter of angular fibers QTL (2793), Teat number QTL (276), Loin fat percentage QTL (38050)
6	1	5494501	5501000	Loin muscle area QTL (38072), Body weight (birth) QTL (826), Loin muscle area QTL (21352), Marbling QTL (38049), Loin muscle area QTL (3221), Muscle moisture percentage QTL (38073), Glucose level QTL (15087), Diameter of angular fibers QTL (2793), Teat number QTL (276), Loin fat percentage QTL (38050)
7	1	8625501	8634500	average daily gain QTL (5680), Loin muscle area QTL (38072), Body weight (birth) QTL (826), Loin muscle area QTL (21352), Musculus gluteus weight QTL (1276), Stearic acid content QTL (3111), Marbling QTL (38049), Shoulder subcutaneous fat thickness QTL (5671), Loin muscle area QTL (3221), Muscle moisture percentage QTL (38073), Stearic acid content QTL (3119), Glucose level QTL (15087), Diameter …
8	1	9114501	9129500	average daily gain QTL (5680), Loin muscle area QTL (38072), CIE-a* QTL (28043), Body weight (birth) QTL (826), Loin muscle area QTL (21352), Musculus gluteus weight QTL (1276), Stearic acid content QTL (3111), Plateletcrit QTL (107303), Marbling QTL (38049), Shoulder subcutaneous fat thickness QTL (5671), Loin muscle area QTL (3221), Platelet count QTL (107311), Muscle moisture percentage QTL (3…
9	1	11005501	11023500	average daily gain QTL (5680), Loin muscle area QTL (38072), Salmonella count in liver QTL (11554), CIE-a* QTL (28043), Body weight (birth) QTL (826), Loin muscle area QTL (21352), Stearic acid content QTL (3111), Marbling QTL (38049), Shoulder subcutaneous fat thickness QTL (5671), Loin muscle area QTL (3221), Muscle moisture percentage QTL (38073), average daily gain QTL (319), Stearic acid con…
10	1	18345501	18352000	average daily gain QTL (5680), Drip loss QTL (8043), Loin muscle area QTL (38072), backfat above muscle dorsi QTL (5237), Drip loss QTL (8482), PH for Longissmus dorsi QTL (2787), Body weight QTL (66275), backfat at last rib QTL (5674), Drip loss QTL (8349), Estimated carcass lean content QTL (5678), Marbling QTL (38049), Leaf fat weight QTL (3863), Drip loss QTL (8012), Shoulder subcutaneous fat…
11	1	24400001	24407000	Pseudorabies virus antibody titer QTL (13481), Lymphocyte number QTL (13483), average daily gain QTL (5680), Drip loss QTL (8043), muscle protein percentage QTL (3838), Loin muscle area QTL (38072), backfat above muscle dorsi QTL (5237), average daily gain QTL (338), White blood cell counts QTL (15047), PH for Longissmus dorsi QTL (2787), backfat at last rib QTL (5674), CIE-a* QTL (3980), Drip lo…
12	1	25199501	25206000	average daily gain QTL (5680), Drip loss QTL (8043), muscle protein percentage QTL (3838), Loin muscle area QTL (46), Loin muscle area QTL (38072), Carcass weight (hot) QTL (16896), backfat above muscle dorsi QTL (5237), average daily gain QTL (338), White blood cell counts QTL (15047), Daily feed intake QTL (66267), PH for Longissmus dorsi QTL (2787), backfat at last rib QTL (5674), CIE-a* QTL (…
13	1	31123501	31138500	average daily gain QTL (5680), Drip loss QTL (8043), muscle protein percentage QTL (3838), Loin muscle area QTL (46), Loin muscle area QTL (38072), Carcass weight (hot) QTL (16896), backfat above muscle dorsi QTL (5237), average daily gain QTL (338), White blood cell counts QTL (15047), PH for Longissmus dorsi QTL (2787), backfat at last rib QTL (5674), CIE-a* QTL (3980), Drip loss QTL (8349), Es…
14	1	31225001	31230000	average daily gain QTL (5680), Drip loss QTL (8043), muscle protein percentage QTL (3838), Loin muscle area QTL (46), Loin muscle area QTL (38072), Carcass weight (hot) QTL (16896), backfat above muscle dorsi QTL (5237), average daily gain QTL (338), White blood cell counts QTL (15047), PH for Longissmus dorsi QTL (2787), backfat at last rib QTL (5674), CIE-a* QTL (3980), Drip loss QTL (8349), Es…
15	1	31236001	31241000	average daily gain QTL (5680), Drip loss QTL (8043), muscle protein percentage QTL (3838), Loin muscle area QTL (46), Loin muscle area QTL (38072), Carcass weight (hot) QTL (16896), backfat above muscle dorsi QTL (5237), average daily gain QTL (338), White blood cell counts QTL (15047), PH for Longissmus dorsi QTL (2787), backfat at last rib QTL (5674), CIE-a* QTL (3980), Drip loss QTL (8349), Es…
16	1	31238501	31248000	average daily gain QTL (5680), Drip loss QTL (8043), muscle protein percentage QTL (3838), Loin muscle area QTL (46), Loin muscle area QTL (38072), Carcass weight (hot) QTL (16896), backfat above muscle dorsi QTL (5237), average daily gain QTL (338), White blood cell counts QTL (15047), PH for Longissmus dorsi QTL (2787), backfat at last rib QTL (5674), CIE-a* QTL (3980), Drip loss QTL (8349), Es…
17	1	37308001	37314500	Drip loss QTL (7828), average daily gain QTL (5680), Drip loss QTL (8043), Estimated carcass lean content QTL (5960), muscle protein percentage QTL (3838), CD2-positive leukocyte number QTL (4260), Drip loss QTL (8597), Loin and neck meat weight QTL (807), Loin muscle area QTL (46), Carcass weight (cold) QTL (792), Loin muscle area QTL (38072), Carcass weight (cold) QTL (12710), Carcass weight (h…
18	1	42555001	42560000	Drip loss QTL (7828), average daily gain QTL (5680), Drip loss QTL (8043), Estimated carcass lean content QTL (5960), muscle protein percentage QTL (3838), CD2-positive leukocyte number QTL (4260), Drip loss QTL (8597), Loin and neck meat weight QTL (807), Loin muscle area QTL (46), Carcass weight (cold) QTL (792), Loin muscle area QTL (38072), Carcass weight (cold) QTL (12710), Carcass weight (h…
19	1	42736501	42741000	Drip loss QTL (7828), average daily gain QTL (5680), Drip loss QTL (8043), Estimated carcass lean content QTL (5960), muscle protein percentage QTL (3838), CD2-positive leukocyte number QTL (4260), Drip loss QTL (8597), Loin and neck meat weight QTL (807), Loin muscle area QTL (46), Carcass weight (cold) QTL (792), Loin muscle area QTL (38072), Carcass weight (cold) QTL (12710), Carcass weight (h…
20	1	46691501	46737000	average daily gain QTL (5680), Drip loss QTL (8043), Estimated carcass lean content QTL (5960), muscle protein percentage QTL (3838), CD2-positive leukocyte number QTL (4260), Loin and neck meat weight QTL (807), Loin muscle area QTL (46), Carcass weight (cold) QTL (792), Backfat at rump QTL (21206), Loin muscle area QTL (38072), Carcass weight (cold) QTL (12710), Carcass weight (hot) QTL (16896)…
21	1	46726001	46738500	average daily gain QTL (5680), Drip loss QTL (8043), Estimated carcass lean content QTL (5960), muscle protein percentage QTL (3838), CD2-positive leukocyte number QTL (4260), Loin and neck meat weight QTL (807), Loin muscle area QTL (46), Carcass weight (cold) QTL (792), Backfat at rump QTL (21206), Loin muscle area QTL (38072), Carcass weight (cold) QTL (12710), Carcass weight (hot) QTL (16896)…
22	1	46730001	46747500	average daily gain QTL (5680), Drip loss QTL (8043), Estimated carcass lean content QTL (5960), muscle protein percentage QTL (3838), CD2-positive leukocyte number QTL (4260), Loin and neck meat weight QTL (807), Loin muscle area QTL (46), Carcass weight (cold) QTL (792), Backfat at rump QTL (21206), Loin muscle area QTL (38072), Carcass weight (cold) QTL (12710), Carcass weight (hot) QTL (16896)…
23	1	46813501	46822000	average daily gain QTL (5680), Drip loss QTL (8043), Estimated carcass lean content QTL (5960), muscle protein percentage QTL (3838), CD2-positive leukocyte number QTL (4260), Loin and neck meat weight QTL (807), Loin muscle area QTL (46), Carcass weight (cold) QTL (792), Backfat at rump QTL (21206), Loin muscle area QTL (38072), Carcass weight (cold) QTL (12710), Carcass weight (hot) QTL (16896)…
24	1	46846501	46913000	average daily gain QTL (5680), Drip loss QTL (8043), Estimated carcass lean content QTL (5960), muscle protein percentage QTL (3838), CD2-positive leukocyte number QTL (4260), Loin and neck meat weight QTL (807), Loin muscle area QTL (46), Carcass weight (cold) QTL (792), Backfat at rump QTL (21206), Loin muscle area QTL (38072), Carcass weight (cold) QTL (12710), Carcass weight (hot) QTL (16896)…
25	1	46906501	46955000	average daily gain QTL (5680), Drip loss QTL (8043), Estimated carcass lean content QTL (5960), muscle protein percentage QTL (3838), CD2-positive leukocyte number QTL (4260), Loin and neck meat weight QTL (807), Loin muscle area QTL (46), Carcass weight (cold) QTL (792), Backfat at rump QTL (21206), Loin muscle area QTL (38072), Carcass weight (cold) QTL (12710), Carcass weight (hot) QTL (16896)…
26	1	46953001	46964500	average daily gain QTL (5680), Drip loss QTL (8043), Estimated carcass lean content QTL (5960), muscle protein percentage QTL (3838), CD2-positive leukocyte number QTL (4260), Loin and neck meat weight QTL (807), Loin muscle area QTL (46), Carcass weight (cold) QTL (792), Backfat at rump QTL (21206), Loin muscle area QTL (38072), Carcass weight (cold) QTL (12710), Carcass weight (hot) QTL (16896)…
27	1	47259501	47269500	average daily gain QTL (5680), Drip loss QTL (8043), Estimated carcass lean content QTL (5960), muscle protein percentage QTL (3838), CD2-positive leukocyte number QTL (4260), Loin and neck meat weight QTL (807), Loin muscle area QTL (46), Carcass weight (cold) QTL (792), Backfat at rump QTL (21206), Loin muscle area QTL (38072), Carcass weight (cold) QTL (12710), Carcass weight (hot) QTL (16896)…
28	1	54305501	54322000	average daily gain QTL (5680), Drip loss QTL (8043), Estimated carcass lean content QTL (5960), CD2-positive leukocyte number QTL (4260), Backfat at rump QTL (21206), Loin muscle area QTL (38072), backfat above muscle dorsi QTL (5237), Feed intake QTL (871), White blood cell counts QTL (15047), backfat at last rib QTL (5674), Marbling QTL (4019), Head weight QTL (860), Drip loss QTL (8349), Estim…
29	1	54311501	54331500	average daily gain QTL (5680), Drip loss QTL (8043), Estimated carcass lean content QTL (5960), CD2-positive leukocyte number QTL (4260), Backfat at rump QTL (21206), Loin muscle area QTL (38072), backfat above muscle dorsi QTL (5237), Feed intake QTL (871), White blood cell counts QTL (15047), backfat at last rib QTL (5674), Marbling QTL (4019), Head weight QTL (860), Drip loss QTL (8349), Estim…
30	1	56337001	56339500	Daily feed intake QTL (22384), average daily gain QTL (5680), Drip loss QTL (8043), Daily feed intake QTL (22387), Estimated carcass lean content QTL (5960), CD2-positive leukocyte number QTL (4260), Backfat at rump QTL (21206), Loin muscle area QTL (38072), backfat above muscle dorsi QTL (5237), Daily feed intake QTL (22370), Feed intake QTL (871), White blood cell counts QTL (15047), Daily feed…
31	1	67982001	67993000	Liver weight QTL (13265), average daily gain QTL (5680), Drip loss QTL (8043), Potassium level QTL (6380), Estimated carcass lean content QTL (5960), CD2-positive leukocyte number QTL (4260), backfat at P2 position QTL (4107), average daily gain QTL (3673), Backfat at rump QTL (21206), Loin muscle area QTL (38072), backfat above muscle dorsi QTL (5237), Feed intake QTL (871), White blood cell cou…
32	1	69271001	69308000	Liver weight QTL (13265), average daily gain QTL (5680), Drip loss QTL (8043), Potassium level QTL (6380), Estimated carcass lean content QTL (5960), CD2-positive leukocyte number QTL (4260), backfat at P2 position QTL (4107), average daily gain QTL (3673), Backfat at rump QTL (21206), Loin muscle area QTL (38072), backfat above muscle dorsi QTL (5237), Feed intake QTL (871), White blood cell cou…
33	1	71892001	71901000	Liver weight QTL (13265), average daily gain QTL (5680), Drip loss QTL (8043), Potassium level QTL (6380), Estimated carcass lean content QTL (5960), CD2-positive leukocyte number QTL (4260), backfat at P2 position QTL (4107), average daily gain QTL (3673), Backfat at rump QTL (21206), Loin muscle area QTL (38072), backfat above muscle dorsi QTL (5237), Feed intake QTL (871), White blood cell cou…
34	1	88878501	88885000	average daily gain QTL (5680), Drip loss QTL (8043), Potassium level QTL (6380), Estimated carcass lean content QTL (5960), CD2-positive leukocyte number QTL (4260), backfat at P2 position QTL (4107), average daily gain QTL (3673), Backfat at rump QTL (21206), Loin muscle area QTL (38072), backfat above muscle dorsi QTL (5237), Ear weight QTL (8853), Feed intake QTL (871), White blood cell counts…
35	1	88883001	88898500	average daily gain QTL (5680), Drip loss QTL (8043), Potassium level QTL (6380), Estimated carcass lean content QTL (5960), CD2-positive leukocyte number QTL (4260), backfat at P2 position QTL (4107), average daily gain QTL (3673), Backfat at rump QTL (21206), Loin muscle area QTL (38072), backfat above muscle dorsi QTL (5237), Ear weight QTL (8853), Feed intake QTL (871), White blood cell counts…
36	1	88905001	88917000	average daily gain QTL (5680), Drip loss QTL (8043), Potassium level QTL (6380), Estimated carcass lean content QTL (5960), CD2-positive leukocyte number QTL (4260), backfat at P2 position QTL (4107), average daily gain QTL (3673), Backfat at rump QTL (21206), Loin muscle area QTL (38072), backfat above muscle dorsi QTL (5237), Ear weight QTL (8853), Feed intake QTL (871), White blood cell counts…
37	1	88914001	88925500	average daily gain QTL (5680), Drip loss QTL (8043), Potassium level QTL (6380), Estimated carcass lean content QTL (5960), CD2-positive leukocyte number QTL (4260), backfat at P2 position QTL (4107), average daily gain QTL (3673), Backfat at rump QTL (21206), Loin muscle area QTL (38072), backfat above muscle dorsi QTL (5237), Ear weight QTL (8853), Feed intake QTL (871), White blood cell counts…
38	1	88938501	88945500	average daily gain QTL (5680), Drip loss QTL (8043), Potassium level QTL (6380), Estimated carcass lean content QTL (5960), CD2-positive leukocyte number QTL (4260), backfat at P2 position QTL (4107), average daily gain QTL (3673), Backfat at rump QTL (21206), Loin muscle area QTL (38072), backfat above muscle dorsi QTL (5237), Ear weight QTL (8853), Feed intake QTL (871), White blood cell counts…
39	1	89006001	89009000	average daily gain QTL (5680), Drip loss QTL (8043), Potassium level QTL (6380), Estimated carcass lean content QTL (5960), CD2-positive leukocyte number QTL (4260), backfat at P2 position QTL (4107), average daily gain QTL (3673), Backfat at rump QTL (21206), Loin muscle area QTL (38072), backfat above muscle dorsi QTL (5237), Ear weight QTL (8853), Feed intake QTL (871), White blood cell counts…
40	1	89007501	89015500	average daily gain QTL (5680), Drip loss QTL (8043), Potassium level QTL (6380), Estimated carcass lean content QTL (5960), CD2-positive leukocyte number QTL (4260), backfat at P2 position QTL (4107), average daily gain QTL (3673), Backfat at rump QTL (21206), Loin muscle area QTL (38072), backfat above muscle dorsi QTL (5237), Ear weight QTL (8853), Feed intake QTL (871), White blood cell counts…
41	1	89016001	89023000	average daily gain QTL (5680), Drip loss QTL (8043), Potassium level QTL (6380), Estimated carcass lean content QTL (5960), CD2-positive leukocyte number QTL (4260), backfat at P2 position QTL (4107), average daily gain QTL (3673), Backfat at rump QTL (21206), Loin muscle area QTL (38072), backfat above muscle dorsi QTL (5237), Ear weight QTL (8853), Feed intake QTL (871), White blood cell counts…
42	1	89040001	89055500	average daily gain QTL (5680), Drip loss QTL (8043), Potassium level QTL (6380), Estimated carcass lean content QTL (5960), CD2-positive leukocyte number QTL (4260), backfat at P2 position QTL (4107), average daily gain QTL (3673), Backfat at rump QTL (21206), Loin muscle area QTL (38072), backfat above muscle dorsi QTL (5237), Ear weight QTL (8853), Feed intake QTL (871), White blood cell counts…
43	1	89120001	89129000	average daily gain QTL (5680), Drip loss QTL (8043), Potassium level QTL (6380), Estimated carcass lean content QTL (5960), CD2-positive leukocyte number QTL (4260), backfat at P2 position QTL (4107), average daily gain QTL (3673), Backfat at rump QTL (21206), Loin muscle area QTL (38072), backfat above muscle dorsi QTL (5237), Ear weight QTL (8853), Feed intake QTL (871), White blood cell counts…
44	1	93632501	93640000	average daily gain QTL (5680), Drip loss QTL (8043), Potassium level QTL (6380), Estimated carcass lean content QTL (5960), CD2-positive leukocyte number QTL (4260), backfat at P2 position QTL (4107), average daily gain QTL (3673), Backfat at rump QTL (21206), Loin muscle area QTL (38072), backfat above muscle dorsi QTL (5237), Ear weight QTL (8853), Feed intake QTL (871), White blood cell counts…
45	1	93764001	93769500	average daily gain QTL (5680), Drip loss QTL (8043), Potassium level QTL (6380), Estimated carcass lean content QTL (5960), CD2-positive leukocyte number QTL (4260), backfat at P2 position QTL (4107), average daily gain QTL (3673), Backfat at rump QTL (21206), Loin muscle area QTL (38072), backfat above muscle dorsi QTL (5237), Ear weight QTL (8853), Feed intake QTL (871), White blood cell counts…
46	1	98608501	98618000	Drip loss QTL (7766), average daily gain QTL (5680), Drip loss QTL (8043), Potassium level QTL (6380), Estimated carcass lean content QTL (5960), CD2-positive leukocyte number QTL (4260), backfat at P2 position QTL (4107), Drip loss QTL (8450), CIE-L* QTL (4326), average daily gain QTL (3673), Backfat at rump QTL (21206), Loin muscle area QTL (38072), backfat above muscle dorsi QTL (5237), Ear we…
47	1	99968001	99972000	Drip loss QTL (7766), average daily gain QTL (5680), Drip loss QTL (8043), Potassium level QTL (6380), Estimated carcass lean content QTL (5960), CD2-positive leukocyte number QTL (4260), backfat at P2 position QTL (4107), Drip loss QTL (8450), CIE-L* QTL (4326), average daily gain QTL (3673), Backfat at rump QTL (21206), Loin muscle area QTL (38072), backfat above muscle dorsi QTL (5237), Ear we…
48	1	100577501	100581500	Drip loss QTL (7766), average daily gain QTL (5680), Drip loss QTL (8043), Potassium level QTL (6380), Estimated carcass lean content QTL (5960), CD2-positive leukocyte number QTL (4260), backfat at P2 position QTL (4107), Drip loss QTL (8450), CIE-L* QTL (4326), average daily gain QTL (3673), Backfat at rump QTL (21206), Loin muscle area QTL (38072), backfat above muscle dorsi QTL (5237), Ear we…
49	1	107684501	107694000	Drip loss QTL (8300), average daily gain QTL (5680), Drip loss QTL (8043), Potassium level QTL (6380), Drip loss QTL (8022), CD2-positive leukocyte number QTL (4260), backfat at P2 position QTL (4107), Linoleic acid content QTL (32101), pH for Semimembranosus QTL (5665), CIE-L* QTL (4326), average daily gain QTL (3673), Backfat at rump QTL (21206), Loin muscle area QTL (38072), backfat above musc…
50	1	107714501	107721500	Drip loss QTL (8300), average daily gain QTL (5680), Drip loss QTL (8043), Potassium level QTL (6380), Drip loss QTL (8022), CD2-positive leukocyte number QTL (4260), backfat at P2 position QTL (4107), Linoleic acid content QTL (32101), pH for Semimembranosus QTL (5665), CIE-L* QTL (4326), average daily gain QTL (3673), Backfat at rump QTL (21206), Loin muscle area QTL (38072), backfat above musc…
51	1	129278501	129281000	Drip loss QTL (8300), average daily gain QTL (5680), Potassium level QTL (6380), CD2-positive leukocyte number QTL (4260), backfat at P2 position QTL (4107), pH for Semimembranosus QTL (5665), CIE-L* QTL (4326), average daily gain QTL (3673), Backfat at rump QTL (21206), Loin muscle area QTL (38072), backfat above muscle dorsi QTL (5237), Ear weight QTL (8853), Backfat weight QTL (3171), Feed int…
52	1	133677501	133693000	Drip loss QTL (8300), average daily gain QTL (5680), Potassium level QTL (6380), Fat percentage in carcass QTL (65014), CD2-positive leukocyte number QTL (4260), pH for Semimembranosus QTL (5665), CIE-L* QTL (4326), Backfat at rump QTL (21206), Platelet distribution width QTL (12312), Loin muscle area QTL (38072), backfat above muscle dorsi QTL (5237), Ear weight QTL (8853), Backfat weight QTL (3…
53	1	133805001	133832000	Drip loss QTL (8300), average daily gain QTL (5680), Potassium level QTL (6380), Fat percentage in carcass QTL (65014), CD2-positive leukocyte number QTL (4260), pH for Semimembranosus QTL (5665), CIE-L* QTL (4326), Backfat at rump QTL (21206), Platelet distribution width QTL (12312), Loin muscle area QTL (38072), backfat above muscle dorsi QTL (5237), Ear weight QTL (8853), Backfat weight QTL (3…
54	1	133825501	133840000	Drip loss QTL (8300), average daily gain QTL (5680), Potassium level QTL (6380), Fat percentage in carcass QTL (65014), CD2-positive leukocyte number QTL (4260), pH for Semimembranosus QTL (5665), CIE-L* QTL (4326), Backfat at rump QTL (21206), Platelet distribution width QTL (12312), Loin muscle area QTL (38072), backfat above muscle dorsi QTL (5237), Ear weight QTL (8853), Backfat weight QTL (3…
55	1	133844001	133849000	Drip loss QTL (8300), average daily gain QTL (5680), Potassium level QTL (6380), Fat percentage in carcass QTL (65014), CD2-positive leukocyte number QTL (4260), pH for Semimembranosus QTL (5665), CIE-L* QTL (4326), Backfat at rump QTL (21206), Platelet distribution width QTL (12312), Loin muscle area QTL (38072), backfat above muscle dorsi QTL (5237), Ear weight QTL (8853), Backfat weight QTL (3…
56	1	139401501	139404000	Drip loss QTL (8300), average daily gain QTL (5680), Potassium level QTL (6380), CD2-positive leukocyte number QTL (4260), Drip loss QTL (7744), pH for Semimembranosus QTL (5665), CIE-L* QTL (4326), Backfat at rump QTL (21206), Platelet distribution width QTL (12312), Loin muscle area QTL (38072), backfat above muscle dorsi QTL (5237), Ear weight QTL (8853), Backfat weight QTL (3171), Drip loss Q…
57	1	139401501	139408500	Drip loss QTL (8300), average daily gain QTL (5680), Potassium level QTL (6380), CD2-positive leukocyte number QTL (4260), Drip loss QTL (7744), pH for Semimembranosus QTL (5665), CIE-L* QTL (4326), Backfat at rump QTL (21206), Platelet distribution width QTL (12312), Loin muscle area QTL (38072), backfat above muscle dorsi QTL (5237), Ear weight QTL (8853), Backfat weight QTL (3171), Drip loss Q…
58	1	140010501	140041500	Drip loss QTL (8300), average daily gain QTL (5680), Potassium level QTL (6380), CD2-positive leukocyte number QTL (4260), pH for Semimembranosus QTL (5665), CIE-L* QTL (4326), Backfat at rump QTL (21206), Platelet distribution width QTL (12312), Loin muscle area QTL (38072), backfat above muscle dorsi QTL (5237), Ear weight QTL (8853), Backfat weight QTL (3171), Feed intake QTL (871), White bloo…
59	1	140070001	140077500	Drip loss QTL (8300), average daily gain QTL (5680), Potassium level QTL (6380), CD2-positive leukocyte number QTL (4260), pH for Semimembranosus QTL (5665), CIE-L* QTL (4326), Backfat at rump QTL (21206), Platelet distribution width QTL (12312), Loin muscle area QTL (38072), backfat above muscle dorsi QTL (5237), Ear weight QTL (8853), Backfat weight QTL (3171), Feed intake QTL (871), White bloo…
60	1	140692501	140711500	Drip loss QTL (8300), average daily gain QTL (5680), Potassium level QTL (6380), Backfat at rump QTL (17872), CD2-positive leukocyte number QTL (4260), pH for Semimembranosus QTL (5665), CIE-L* QTL (4326), Backfat at rump QTL (21206), Platelet distribution width QTL (12312), Loin muscle area QTL (38072), backfat above muscle dorsi QTL (5237), Ear weight QTL (8853), Backfat weight QTL (3171), Feed…
61	1	147103001	147110000	Drip loss QTL (8300), average daily gain QTL (5680), Potassium level QTL (6380), CD2-positive leukocyte number QTL (4260), pH for Semimembranosus QTL (5665), Backfat at rump QTL (21206), Platelet distribution width QTL (12312), Loin muscle area QTL (38072), backfat above muscle dorsi QTL (5237), Ear weight QTL (8853), Backfat weight QTL (3171), Feed intake QTL (871), White blood cell counts QTL (…
62	1	147217001	147221500	Drip loss QTL (8300), average daily gain QTL (5680), Potassium level QTL (6380), CD2-positive leukocyte number QTL (4260), pH for Semimembranosus QTL (5665), Backfat at rump QTL (21206), Platelet distribution width QTL (12312), Loin muscle area QTL (38072), backfat above muscle dorsi QTL (5237), Ear weight QTL (8853), Backfat weight QTL (3171), Feed intake QTL (871), White blood cell counts QTL (…
63	1	147249001	147255000	Drip loss QTL (8300), average daily gain QTL (5680), Potassium level QTL (6380), CD2-positive leukocyte number QTL (4260), pH for Semimembranosus QTL (5665), Backfat at rump QTL (21206), Platelet distribution width QTL (12312), Loin muscle area QTL (38072), backfat above muscle dorsi QTL (5237), Ear weight QTL (8853), Backfat weight QTL (3171), Feed intake QTL (871), White blood cell counts QTL (…
64	1	163263501	163266500	Daily feed intake QTL (141), Drip loss QTL (8300), average daily gain QTL (5680), Potassium level QTL (6380), CD2-positive leukocyte number QTL (4260), Side fat thickness QTL (5958), pH for Semimembranosus QTL (5665), Backfat at tenth rib QTL (138), Backfat at rump QTL (21206), Platelet distribution width QTL (12312), Loin muscle area QTL (38072), backfat above muscle dorsi QTL (5237), Backfat we…
65	1	163268501	163271000	Daily feed intake QTL (141), Drip loss QTL (8300), average daily gain QTL (5680), Potassium level QTL (6380), CD2-positive leukocyte number QTL (4260), Side fat thickness QTL (5958), pH for Semimembranosus QTL (5665), Backfat at tenth rib QTL (138), Backfat at rump QTL (21206), Platelet distribution width QTL (12312), Loin muscle area QTL (38072), backfat above muscle dorsi QTL (5237), Backfat we…
66	1	169491001	169497000	Daily feed intake QTL (141), Drip loss QTL (8300), Backfat weight QTL (12724), average daily gain QTL (5680), Potassium level QTL (6380), CD2-positive leukocyte number QTL (4260), Side fat thickness QTL (5958), pH for Semimembranosus QTL (5665), Head weight QTL (432), Backfat at tenth rib QTL (138), Backfat at rump QTL (21206), Platelet distribution width QTL (12312), Loin muscle area QTL (38072)…
67	1	169503001	169518000	Daily feed intake QTL (141), Drip loss QTL (8300), Backfat weight QTL (12724), average daily gain QTL (5680), Potassium level QTL (6380), CD2-positive leukocyte number QTL (4260), Side fat thickness QTL (5958), pH for Semimembranosus QTL (5665), Head weight QTL (432), Backfat at tenth rib QTL (138), Backfat at rump QTL (21206), Platelet distribution width QTL (12312), Loin muscle area QTL (38072)…
68	1	169570001	169577500	Daily feed intake QTL (141), Drip loss QTL (8300), Backfat weight QTL (12724), average daily gain QTL (5680), Potassium level QTL (6380), CD2-positive leukocyte number QTL (4260), Side fat thickness QTL (5958), pH for Semimembranosus QTL (5665), Head weight QTL (432), Backfat at tenth rib QTL (138), Backfat at rump QTL (21206), Platelet distribution width QTL (12312), Loin muscle area QTL (38072)…
69	1	169582001	169587000	Daily feed intake QTL (141), Drip loss QTL (8300), Backfat weight QTL (12724), average daily gain QTL (5680), Potassium level QTL (6380), CD2-positive leukocyte number QTL (4260), Side fat thickness QTL (5958), pH for Semimembranosus QTL (5665), Head weight QTL (432), Backfat at tenth rib QTL (138), Backfat at rump QTL (21206), Platelet distribution width QTL (12312), Loin muscle area QTL (38072)…
70	1	169618501	169624500	Daily feed intake QTL (141), Drip loss QTL (8300), Backfat weight QTL (12724), average daily gain QTL (5680), Potassium level QTL (6380), CD2-positive leukocyte number QTL (4260), Side fat thickness QTL (5958), pH for Semimembranosus QTL (5665), Head weight QTL (432), Backfat at tenth rib QTL (138), Backfat at rump QTL (21206), Platelet distribution width QTL (12312), Loin muscle area QTL (38072)…
71	1	169623501	169630500	Daily feed intake QTL (141), Drip loss QTL (8300), Backfat weight QTL (12724), average daily gain QTL (5680), Potassium level QTL (6380), CD2-positive leukocyte number QTL (4260), Side fat thickness QTL (5958), pH for Semimembranosus QTL (5665), Head weight QTL (432), Backfat at tenth rib QTL (138), Backfat at rump QTL (21206), Platelet distribution width QTL (12312), Loin muscle area QTL (38072)…
72	1	169709501	169717000	Daily feed intake QTL (141), Drip loss QTL (8300), Backfat weight QTL (12724), average daily gain QTL (5680), Potassium level QTL (6380), CD2-positive leukocyte number QTL (4260), Side fat thickness QTL (5958), pH for Semimembranosus QTL (5665), Head weight QTL (432), Backfat at tenth rib QTL (138), Backfat at rump QTL (21206), Platelet distribution width QTL (12312), Loin muscle area QTL (38072)…
73	1	172003001	172005500	Daily feed intake QTL (141), Drip loss QTL (8300), Backfat weight QTL (12724), average daily gain QTL (5680), Potassium level QTL (6380), CD2-positive leukocyte number QTL (4260), Side fat thickness QTL (5958), pH for Semimembranosus QTL (5665), Head weight QTL (432), Backfat at tenth rib QTL (138), Backfat at rump QTL (21206), Platelet distribution width QTL (12312), Loin muscle area QTL (38072)…
74	1	172189501	172193000	Daily feed intake QTL (141), Drip loss QTL (8300), Backfat weight QTL (12724), average daily gain QTL (5680), Potassium level QTL (6380), CD2-positive leukocyte number QTL (4260), Side fat thickness QTL (5958), pH for Semimembranosus QTL (5665), Head weight QTL (432), Backfat at tenth rib QTL (138), Backfat at rump QTL (21206), average daily gain QTL (22259), Platelet distribution width QTL (1231…
75	1	172193501	172198500	Daily feed intake QTL (141), Drip loss QTL (8300), Backfat weight QTL (12724), average daily gain QTL (5680), Potassium level QTL (6380), CD2-positive leukocyte number QTL (4260), Side fat thickness QTL (5958), pH for Semimembranosus QTL (5665), Head weight QTL (432), Backfat at tenth rib QTL (138), Backfat at rump QTL (21206), average daily gain QTL (22259), Platelet distribution width QTL (1231…
76	1	172319001	172333500	Daily feed intake QTL (141), Drip loss QTL (8300), Backfat weight QTL (12724), average daily gain QTL (5680), Potassium level QTL (6380), CD2-positive leukocyte number QTL (4260), Side fat thickness QTL (5958), pH for Semimembranosus QTL (5665), Head weight QTL (432), Backfat at tenth rib QTL (138), Backfat at rump QTL (21206), average daily gain QTL (22259), Platelet distribution width QTL (1231…
77	1	172417501	172427000	Daily feed intake QTL (141), Drip loss QTL (8300), Backfat weight QTL (12724), average daily gain QTL (5680), Potassium level QTL (6380), CD2-positive leukocyte number QTL (4260), Side fat thickness QTL (5958), pH for Semimembranosus QTL (5665), Head weight QTL (432), Backfat at tenth rib QTL (138), Backfat at rump QTL (21206), average daily gain QTL (22259), Platelet distribution width QTL (1231…
78	1	172475501	172478000	Daily feed intake QTL (141), Drip loss QTL (8300), Backfat weight QTL (12724), average daily gain QTL (5680), Potassium level QTL (6380), CD2-positive leukocyte number QTL (4260), Side fat thickness QTL (5958), pH for Semimembranosus QTL (5665), Head weight QTL (432), Backfat at tenth rib QTL (138), Backfat at rump QTL (21206), average daily gain QTL (22259), Platelet distribution width QTL (1231…
79	1	203100501	203103000	Daily feed intake QTL (141), Drip loss QTL (8300), Backfat weight QTL (12724), average daily gain QTL (5680), Potassium level QTL (6380), CD2-positive leukocyte number QTL (4260), Side fat thickness QTL (5958), pH for Semimembranosus QTL (5665), Head weight QTL (432), Backfat at tenth rib QTL (138), Backfat at rump QTL (21206), Platelet distribution width QTL (12312), Loin muscle area QTL (38072)…
80	1	210865501	210869500	Daily feed intake QTL (141), Drip loss QTL (8300), Backfat weight QTL (12724), average daily gain QTL (5680), Potassium level QTL (6380), CD2-positive leukocyte number QTL (4260), Head weight QTL (432), Backfat at tenth rib QTL (138), Backfat at rump QTL (21206), Platelet distribution width QTL (12312), Loin muscle area QTL (38072), backfat above muscle dorsi QTL (5237), Backfat weight QTL (3171)…
81	1	211029501	211035000	Daily feed intake QTL (141), Drip loss QTL (8300), Backfat weight QTL (12724), average daily gain QTL (5680), Potassium level QTL (6380), CD2-positive leukocyte number QTL (4260), Head weight QTL (432), Backfat at tenth rib QTL (138), Backfat at rump QTL (21206), Platelet distribution width QTL (12312), Loin muscle area QTL (38072), backfat above muscle dorsi QTL (5237), Backfat weight QTL (3171)…
82	1	213405001	213410500	Daily feed intake QTL (141), Drip loss QTL (8300), Backfat weight QTL (12724), average daily gain QTL (5680), Potassium level QTL (6380), CD2-positive leukocyte number QTL (4260), Head weight QTL (432), Backfat at tenth rib QTL (138), Backfat at rump QTL (21206), Platelet distribution width QTL (12312), Loin muscle area QTL (38072), backfat above muscle dorsi QTL (5237), Backfat weight QTL (3171)…
83	1	213428001	213447500	Daily feed intake QTL (141), Drip loss QTL (8300), Backfat weight QTL (12724), average daily gain QTL (5680), Potassium level QTL (6380), CD2-positive leukocyte number QTL (4260), Head weight QTL (432), Backfat at tenth rib QTL (138), Backfat at rump QTL (21206), Platelet distribution width QTL (12312), Loin muscle area QTL (38072), backfat above muscle dorsi QTL (5237), Backfat weight QTL (3171)…
84	1	213474001	213479500	Daily feed intake QTL (141), Drip loss QTL (8300), Backfat weight QTL (12724), average daily gain QTL (5680), Potassium level QTL (6380), CD2-positive leukocyte number QTL (4260), Head weight QTL (432), Backfat at tenth rib QTL (138), Backfat at rump QTL (21206), Platelet distribution width QTL (12312), Loin muscle area QTL (38072), backfat above muscle dorsi QTL (5237), Backfat weight QTL (3171)…
85	1	213478001	213496500	Daily feed intake QTL (141), Drip loss QTL (8300), Backfat weight QTL (12724), average daily gain QTL (5680), Potassium level QTL (6380), CD2-positive leukocyte number QTL (4260), Head weight QTL (432), Backfat at tenth rib QTL (138), Backfat at rump QTL (21206), Platelet distribution width QTL (12312), Loin muscle area QTL (38072), backfat above muscle dorsi QTL (5237), Backfat weight QTL (3171)…
86	1	213494501	213499000	Daily feed intake QTL (141), Drip loss QTL (8300), Backfat weight QTL (12724), average daily gain QTL (5680), Potassium level QTL (6380), CD2-positive leukocyte number QTL (4260), Head weight QTL (432), Backfat at tenth rib QTL (138), Backfat at rump QTL (21206), Platelet distribution width QTL (12312), Loin muscle area QTL (38072), backfat above muscle dorsi QTL (5237), Backfat weight QTL (3171)…
87	1	213518501	213528500	Daily feed intake QTL (141), Drip loss QTL (8300), Backfat weight QTL (12724), average daily gain QTL (5680), Potassium level QTL (6380), CD2-positive leukocyte number QTL (4260), Head weight QTL (432), Backfat at tenth rib QTL (138), Backfat at rump QTL (21206), Platelet distribution width QTL (12312), Loin muscle area QTL (38072), backfat above muscle dorsi QTL (5237), Backfat weight QTL (3171)…
88	1	213530501	213535000	Daily feed intake QTL (141), Drip loss QTL (8300), Backfat weight QTL (12724), average daily gain QTL (5680), Potassium level QTL (6380), CD2-positive leukocyte number QTL (4260), Head weight QTL (432), Backfat at tenth rib QTL (138), Backfat at rump QTL (21206), Platelet distribution width QTL (12312), Loin muscle area QTL (38072), backfat above muscle dorsi QTL (5237), Backfat weight QTL (3171)…
89	1	213608001	213629000	Daily feed intake QTL (141), Drip loss QTL (8300), Backfat weight QTL (12724), average daily gain QTL (5680), Potassium level QTL (6380), CD2-positive leukocyte number QTL (4260), Head weight QTL (432), Backfat at tenth rib QTL (138), Backfat at rump QTL (21206), Platelet distribution width QTL (12312), Loin muscle area QTL (38072), backfat above muscle dorsi QTL (5237), Backfat weight QTL (3171)…
90	1	213652501	213674500	Daily feed intake QTL (141), Drip loss QTL (8300), Backfat weight QTL (12724), average daily gain QTL (5680), Potassium level QTL (6380), CD2-positive leukocyte number QTL (4260), Head weight QTL (432), Backfat at tenth rib QTL (138), Backfat at rump QTL (21206), Platelet distribution width QTL (12312), Loin muscle area QTL (38072), backfat above muscle dorsi QTL (5237), Backfat weight QTL (3171)…
91	1	213696001	213712500	Daily feed intake QTL (141), Drip loss QTL (8300), Backfat weight QTL (12724), average daily gain QTL (5680), Potassium level QTL (6380), CD2-positive leukocyte number QTL (4260), Head weight QTL (432), Backfat at tenth rib QTL (138), Backfat at rump QTL (21206), Platelet distribution width QTL (12312), Loin muscle area QTL (38072), backfat above muscle dorsi QTL (5237), Backfat weight QTL (3171)…
92	1	213755501	213760500	Daily feed intake QTL (141), Drip loss QTL (8300), Backfat weight QTL (12724), average daily gain QTL (5680), Potassium level QTL (6380), CD2-positive leukocyte number QTL (4260), Head weight QTL (432), Backfat at tenth rib QTL (138), Backfat at rump QTL (21206), Platelet distribution width QTL (12312), Loin muscle area QTL (38072), backfat above muscle dorsi QTL (5237), Backfat weight QTL (3171)…
93	1	213802001	213806500	Daily feed intake QTL (141), Drip loss QTL (8300), Backfat weight QTL (12724), average daily gain QTL (5680), Potassium level QTL (6380), CD2-positive leukocyte number QTL (4260), Head weight QTL (432), Backfat at tenth rib QTL (138), Backfat at rump QTL (21206), Platelet distribution width QTL (12312), Loin muscle area QTL (38072), backfat above muscle dorsi QTL (5237), Backfat weight QTL (3171)…
94	1	213912501	213915500	Daily feed intake QTL (141), Drip loss QTL (8300), Backfat weight QTL (12724), average daily gain QTL (5680), Potassium level QTL (6380), CD2-positive leukocyte number QTL (4260), Head weight QTL (432), Backfat at tenth rib QTL (138), Backfat at rump QTL (21206), Platelet distribution width QTL (12312), Loin muscle area QTL (38072), backfat above muscle dorsi QTL (5237), Backfat weight QTL (3171)…
95	1	213920001	213930000	Daily feed intake QTL (141), Drip loss QTL (8300), Backfat weight QTL (12724), average daily gain QTL (5680), Potassium level QTL (6380), CD2-positive leukocyte number QTL (4260), Head weight QTL (432), Backfat at tenth rib QTL (138), Backfat at rump QTL (21206), Platelet distribution width QTL (12312), Loin muscle area QTL (38072), backfat above muscle dorsi QTL (5237), Backfat weight QTL (3171)…
96	1	213932001	213935500	Daily feed intake QTL (141), Drip loss QTL (8300), Backfat weight QTL (12724), average daily gain QTL (5680), Potassium level QTL (6380), CD2-positive leukocyte number QTL (4260), Head weight QTL (432), Backfat at tenth rib QTL (138), Backfat at rump QTL (21206), Platelet distribution width QTL (12312), Loin muscle area QTL (38072), backfat above muscle dorsi QTL (5237), Backfat weight QTL (3171)…
97	1	215058001	215068500	Daily feed intake QTL (141), Drip loss QTL (8300), Backfat weight QTL (12724), average daily gain QTL (5680), Potassium level QTL (6380), CD2-positive leukocyte number QTL (4260), Head weight QTL (432), Backfat at tenth rib QTL (138), Backfat at rump QTL (21206), Platelet distribution width QTL (12312), Loin muscle area QTL (38072), backfat above muscle dorsi QTL (5237), Backfat weight QTL (3171)…
98	1	215083501	215096500	Daily feed intake QTL (141), Drip loss QTL (8300), Backfat weight QTL (12724), average daily gain QTL (5680), Potassium level QTL (6380), CD2-positive leukocyte number QTL (4260), Head weight QTL (432), Backfat at tenth rib QTL (138), Backfat at rump QTL (21206), Platelet distribution width QTL (12312), Loin muscle area QTL (38072), backfat above muscle dorsi QTL (5237), Backfat weight QTL (3171)…
99	1	215116501	215118500	Daily feed intake QTL (141), Drip loss QTL (8300), Backfat weight QTL (12724), average daily gain QTL (5680), Potassium level QTL (6380), CD2-positive leukocyte number QTL (4260), Head weight QTL (432), Backfat at tenth rib QTL (138), Backfat at rump QTL (21206), Platelet distribution width QTL (12312), Loin muscle area QTL (38072), backfat above muscle dorsi QTL (5237), Backfat weight QTL (3171)…
100	1	215138501	215143000	Daily feed intake QTL (141), Drip loss QTL (8300), Backfat weight QTL (12724), average daily gain QTL (5680), Potassium level QTL (6380), CD2-positive leukocyte number QTL (4260), Head weight QTL (432), Backfat at tenth rib QTL (138), Backfat at rump QTL (21206), Platelet distribution width QTL (12312), Loin muscle area QTL (38072), backfat above muscle dorsi QTL (5237), Backfat weight QTL (3171)…
101	1	215273501	215280500	Daily feed intake QTL (141), Drip loss QTL (8300), Backfat weight QTL (12724), average daily gain QTL (5680), Potassium level QTL (6380), CD2-positive leukocyte number QTL (4260), Head weight QTL (432), Backfat at tenth rib QTL (138), Backfat at rump QTL (21206), Platelet distribution width QTL (12312), Loin muscle area QTL (38072), backfat above muscle dorsi QTL (5237), Backfat weight QTL (3171)…
102	1	215377001	215384000	Daily feed intake QTL (141), Drip loss QTL (8300), Backfat weight QTL (12724), average daily gain QTL (5680), Potassium level QTL (6380), CD2-positive leukocyte number QTL (4260), Head weight QTL (432), Backfat at tenth rib QTL (138), Backfat at rump QTL (21206), Platelet distribution width QTL (12312), Loin muscle area QTL (38072), backfat above muscle dorsi QTL (5237), Backfat weight QTL (3171)…
103	1	216307501	216321500	Daily feed intake QTL (141), Drip loss QTL (8300), Backfat weight QTL (12724), average daily gain QTL (5680), Potassium level QTL (6380), CD2-positive leukocyte number QTL (4260), Head weight QTL (432), Backfat at tenth rib QTL (138), Backfat at rump QTL (21206), Platelet distribution width QTL (12312), Loin muscle area QTL (38072), backfat above muscle dorsi QTL (5237), Backfat weight QTL (3171)…
104	1	221172501	221183500	Daily feed intake QTL (141), Drip loss QTL (8300), Ratio of glycolytic muscles weight to ham meat and bone weight QTL (1277), Backfat weight QTL (12724), average daily gain QTL (5680), average daily gain QTL (2847), Potassium level QTL (6380), CD2-positive leukocyte number QTL (4260), average daily gain QTL (2846), Head weight QTL (432), Backfat at tenth rib QTL (138), Backfat at rump QTL (21206)…
105	1	223884001	223887000	Daily feed intake QTL (141), Drip loss QTL (8300), Ratio of glycolytic muscles weight to ham meat and bone weight QTL (1277), Backfat weight QTL (12724), average daily gain QTL (5680), average daily gain QTL (2847), Potassium level QTL (6380), CD2-positive leukocyte number QTL (4260), Drip loss QTL (7809), average daily gain QTL (2846), Head weight QTL (432), Backfat at tenth rib QTL (138), Backf…
106	1	231129501	231133000	External fat on ham QTL (839), Daily feed intake QTL (141), Drip loss QTL (8300), Backfat weight QTL (12724), average daily gain QTL (5680), Lean cuts percentage QTL (806), average daily gain QTL (2847), Gestation length QTL (10617), average daily gain QTL (2846), Head weight QTL (432), Backfat at tenth rib QTL (138), Backfat at rump QTL (21206), Platelet distribution width QTL (12312), Loin musc…
107	1	239058001	239062500	Drip loss QTL (8300), average daily gain QTL (5680), average daily gain QTL (2847), Hind feet conformation QTL (8912), Gestation length QTL (10617), average daily gain QTL (2846), Backfat at rump QTL (21206), Platelet distribution width QTL (12312), Loin muscle area QTL (38072), average daily gain QTL (16887), backfat above muscle dorsi QTL (5237), Fat-cuts percentage QTL (855), Locomotion QTL (4…
108	1	239062001	239074000	Drip loss QTL (8300), average daily gain QTL (5680), average daily gain QTL (2847), Hind feet conformation QTL (8912), Gestation length QTL (10617), average daily gain QTL (2846), Backfat at rump QTL (21206), Platelet distribution width QTL (12312), Loin muscle area QTL (38072), average daily gain QTL (16887), backfat above muscle dorsi QTL (5237), Fat-cuts percentage QTL (855), Locomotion QTL (4…
109	1	239164001	239173500	Drip loss QTL (8300), average daily gain QTL (5680), average daily gain QTL (2847), Hind feet conformation QTL (8912), Gestation length QTL (10617), average daily gain QTL (2846), Backfat at rump QTL (21206), Platelet distribution width QTL (12312), Loin muscle area QTL (38072), average daily gain QTL (16887), backfat above muscle dorsi QTL (5237), Fat-cuts percentage QTL (855), Locomotion QTL (4…
110	1	239175001	239180000	Drip loss QTL (8300), average daily gain QTL (5680), average daily gain QTL (2847), Hind feet conformation QTL (8912), Gestation length QTL (10617), average daily gain QTL (2846), Backfat at rump QTL (21206), Platelet distribution width QTL (12312), Loin muscle area QTL (38072), average daily gain QTL (16887), backfat above muscle dorsi QTL (5237), Fat-cuts percentage QTL (855), Locomotion QTL (4…
111	1	239556001	239573000	Drip loss QTL (8300), average daily gain QTL (5680), average daily gain QTL (2847), Hind feet conformation QTL (8912), Gestation length QTL (10617), average daily gain QTL (2846), Backfat at rump QTL (21206), Platelet distribution width QTL (12312), Loin muscle area QTL (38072), average daily gain QTL (16887), backfat above muscle dorsi QTL (5237), Fat-cuts percentage QTL (855), Locomotion QTL (4…
112	1	239609001	239624500	Drip loss QTL (8300), average daily gain QTL (5680), average daily gain QTL (2847), Hind feet conformation QTL (8912), Gestation length QTL (10617), average daily gain QTL (2846), Backfat at rump QTL (21206), Platelet distribution width QTL (12312), Loin muscle area QTL (38072), average daily gain QTL (16887), backfat above muscle dorsi QTL (5237), Fat-cuts percentage QTL (855), Locomotion QTL (4…
113	1	239620001	239641500	Drip loss QTL (8300), average daily gain QTL (5680), average daily gain QTL (2847), Hind feet conformation QTL (8912), Gestation length QTL (10617), average daily gain QTL (2846), Backfat at rump QTL (21206), Platelet distribution width QTL (12312), Loin muscle area QTL (38072), average daily gain QTL (16887), backfat above muscle dorsi QTL (5237), Fat-cuts percentage QTL (855), Locomotion QTL (4…
114	1	239640001	239647000	Drip loss QTL (8300), average daily gain QTL (5680), average daily gain QTL (2847), Hind feet conformation QTL (8912), Gestation length QTL (10617), average daily gain QTL (2846), Backfat at rump QTL (21206), Platelet distribution width QTL (12312), Loin muscle area QTL (38072), average daily gain QTL (16887), backfat above muscle dorsi QTL (5237), Fat-cuts percentage QTL (855), Locomotion QTL (4…
115	1	239645001	239652500	Drip loss QTL (8300), average daily gain QTL (5680), average daily gain QTL (2847), Hind feet conformation QTL (8912), Gestation length QTL (10617), average daily gain QTL (2846), Backfat at rump QTL (21206), Platelet distribution width QTL (12312), Loin muscle area QTL (38072), average daily gain QTL (16887), backfat above muscle dorsi QTL (5237), Fat-cuts percentage QTL (855), Locomotion QTL (4…
116	1	239643501	239671000	Drip loss QTL (8300), average daily gain QTL (5680), average daily gain QTL (2847), Hind feet conformation QTL (8912), Gestation length QTL (10617), average daily gain QTL (2846), Backfat at rump QTL (21206), Platelet distribution width QTL (12312), Loin muscle area QTL (38072), average daily gain QTL (16887), backfat above muscle dorsi QTL (5237), Fat-cuts percentage QTL (855), Locomotion QTL (4…
117	1	239681001	239685500	Drip loss QTL (8300), average daily gain QTL (5680), average daily gain QTL (2847), Hind feet conformation QTL (8912), Gestation length QTL (10617), average daily gain QTL (2846), Backfat at rump QTL (21206), Platelet distribution width QTL (12312), Loin muscle area QTL (38072), average daily gain QTL (16887), backfat above muscle dorsi QTL (5237), Fat-cuts percentage QTL (855), Locomotion QTL (4…
118	1	239675501	239720500	Drip loss QTL (8300), average daily gain QTL (5680), average daily gain QTL (2847), Hind feet conformation QTL (8912), Gestation length QTL (10617), average daily gain QTL (2846), Backfat at rump QTL (21206), Platelet distribution width QTL (12312), Loin muscle area QTL (38072), average daily gain QTL (16887), backfat above muscle dorsi QTL (5237), Fat-cuts percentage QTL (855), Locomotion QTL (4…
119	1	239718501	239736500	Drip loss QTL (8300), average daily gain QTL (5680), average daily gain QTL (2847), Hind feet conformation QTL (8912), Gestation length QTL (10617), average daily gain QTL (2846), Backfat at rump QTL (21206), Platelet distribution width QTL (12312), Loin muscle area QTL (38072), average daily gain QTL (16887), backfat above muscle dorsi QTL (5237), Fat-cuts percentage QTL (855), Locomotion QTL (4…
120	1	239876501	239894500	Drip loss QTL (8300), average daily gain QTL (5680), average daily gain QTL (2847), Hind feet conformation QTL (8912), Gestation length QTL (10617), average daily gain QTL (2846), Backfat at rump QTL (21206), Platelet distribution width QTL (12312), Loin muscle area QTL (38072), average daily gain QTL (16887), backfat above muscle dorsi QTL (5237), Fat-cuts percentage QTL (855), Locomotion QTL (4…
121	1	241093501	241097500	Drip loss QTL (8300), average daily gain QTL (5680), average daily gain QTL (2847), Hind feet conformation QTL (8912), Drip loss QTL (8565), Gestation length QTL (10617), average daily gain QTL (2846), Backfat at rump QTL (21206), Platelet distribution width QTL (12312), Loin muscle area QTL (38072), average daily gain QTL (16887), Drip loss QTL (8363), backfat above muscle dorsi QTL (5237), Fat-…
122	1	243769001	243792500	Drip loss QTL (8300), average daily gain QTL (5680), average daily gain QTL (2847), Hind feet conformation QTL (8912), Gestation length QTL (10617), average daily gain QTL (2846), Backfat at rump QTL (21206), Loin muscle area QTL (38072), average daily gain QTL (16887), backfat above muscle dorsi QTL (5237), Fat-cuts percentage QTL (855), Locomotion QTL (478), White blood cell counts QTL (15047),…
123	1	246156501	246172500	Drip loss QTL (8300), average daily gain QTL (5680), average daily gain QTL (2847), Hind feet conformation QTL (8912), Gestation length QTL (10617), average daily gain QTL (2846), Backfat at rump QTL (21206), Loin muscle area QTL (38072), average daily gain QTL (16887), backfat above muscle dorsi QTL (5237), Fat-cuts percentage QTL (855), Locomotion QTL (478), White blood cell counts QTL (15047),…
124	1	250004501	250021500	Drip loss QTL (8300), average daily gain QTL (5680), average daily gain QTL (2847), Hind feet conformation QTL (8912), Gestation length QTL (10617), average daily gain QTL (2846), Backfat at rump QTL (21206), Loin muscle area QTL (38072), average daily gain QTL (16887), backfat above muscle dorsi QTL (5237), Fat-cuts percentage QTL (855), Locomotion QTL (478), White blood cell counts QTL (15047),…
125	1	259425001	259430000	Drip loss QTL (8300), Drip loss QTL (8522), average daily gain QTL (5680), average daily gain QTL (2847), Gestation length QTL (10617), Drip loss QTL (8374), average daily gain QTL (2846), Backfat at rump QTL (21206), Loin muscle area QTL (38072), average daily gain QTL (16887), backfat above muscle dorsi QTL (5237), Fat-cuts percentage QTL (855), White blood cell counts QTL (15047), Drip loss QT…
126	1	259648001	259656500	Drip loss QTL (8300), average daily gain QTL (5680), average daily gain QTL (2847), Gestation length QTL (10617), average daily gain QTL (2846), Backfat at rump QTL (21206), Loin muscle area QTL (38072), average daily gain QTL (16887), backfat above muscle dorsi QTL (5237), Fat-cuts percentage QTL (855), White blood cell counts QTL (15047), Drip loss QTL (8131), average daily gain QTL (22269), ba…
127	1	260765501	260774500	Drip loss QTL (8300), average daily gain QTL (5680), average daily gain QTL (2847), Gestation length QTL (10617), average daily gain QTL (2846), Backfat at rump QTL (21206), Loin muscle area QTL (38072), average daily gain QTL (16887), backfat above muscle dorsi QTL (5237), Fat-cuts percentage QTL (855), White blood cell counts QTL (15047), Drip loss QTL (8131), average daily gain QTL (22269), ba…
128	1	260902501	260910500	Drip loss QTL (8300), average daily gain QTL (5680), average daily gain QTL (2847), Gestation length QTL (10617), average daily gain QTL (2846), Backfat at rump QTL (21206), Loin muscle area QTL (38072), average daily gain QTL (16887), backfat above muscle dorsi QTL (5237), Fat-cuts percentage QTL (855), White blood cell counts QTL (15047), Drip loss QTL (8131), average daily gain QTL (22269), ba…
129	1	260908501	260913000	Drip loss QTL (8300), average daily gain QTL (5680), average daily gain QTL (2847), Gestation length QTL (10617), average daily gain QTL (2846), Backfat at rump QTL (21206), Loin muscle area QTL (38072), average daily gain QTL (16887), backfat above muscle dorsi QTL (5237), Fat-cuts percentage QTL (855), White blood cell counts QTL (15047), Drip loss QTL (8131), average daily gain QTL (22269), ba…
130	1	260931501	260938000	Drip loss QTL (8300), average daily gain QTL (5680), average daily gain QTL (2847), Gestation length QTL (10617), average daily gain QTL (2846), Backfat at rump QTL (21206), Loin muscle area QTL (38072), average daily gain QTL (16887), backfat above muscle dorsi QTL (5237), Fat-cuts percentage QTL (855), White blood cell counts QTL (15047), Drip loss QTL (8131), average daily gain QTL (22269), ba…
131	1	260938001	260953000	Drip loss QTL (8300), average daily gain QTL (5680), average daily gain QTL (2847), Gestation length QTL (10617), average daily gain QTL (2846), Backfat at rump QTL (21206), Loin muscle area QTL (38072), average daily gain QTL (16887), backfat above muscle dorsi QTL (5237), Fat-cuts percentage QTL (855), White blood cell counts QTL (15047), Drip loss QTL (8131), average daily gain QTL (22269), ba…
132	1	260952001	260959000	Drip loss QTL (8300), average daily gain QTL (5680), average daily gain QTL (2847), Gestation length QTL (10617), average daily gain QTL (2846), Backfat at rump QTL (21206), Loin muscle area QTL (38072), average daily gain QTL (16887), backfat above muscle dorsi QTL (5237), Fat-cuts percentage QTL (855), White blood cell counts QTL (15047), Drip loss QTL (8131), average daily gain QTL (22269), ba…
133	1	260957001	260964000	Drip loss QTL (8300), average daily gain QTL (5680), average daily gain QTL (2847), Gestation length QTL (10617), average daily gain QTL (2846), Backfat at rump QTL (21206), Loin muscle area QTL (38072), average daily gain QTL (16887), backfat above muscle dorsi QTL (5237), Fat-cuts percentage QTL (855), White blood cell counts QTL (15047), Drip loss QTL (8131), average daily gain QTL (22269), ba…
134	1	273221501	273230000	Average backfat thickness QTL (35), Drip loss QTL (8300), Average backfat thickness QTL (3145), External fat on ham QTL (861), average daily gain QTL (5680), Average backfat thickness QTL (310), White blood cell counts QTL (5456), PH for Longissmus dorsi QTL (3169), Gestation length QTL (10617), Lean cuts percentage QTL (808), Backfat at rump QTL (21206), Vertebra number QTL (21301), Loin muscle …
135	1	273606001	273612000	Average backfat thickness QTL (35), Drip loss QTL (8300), Average backfat thickness QTL (3145), External fat on ham QTL (861), average daily gain QTL (5680), Average backfat thickness QTL (310), White blood cell counts QTL (5456), PH for Longissmus dorsi QTL (3169), Gestation length QTL (10617), Lean cuts percentage QTL (808), Backfat at rump QTL (21206), Vertebra number QTL (21301), Loin muscle …
136	1	274380501	274387000	Average backfat thickness QTL (35), Drip loss QTL (8300), Average backfat thickness QTL (3145), External fat on ham QTL (861), average daily gain QTL (5680), Average backfat thickness QTL (310), White blood cell counts QTL (5456), PH for Longissmus dorsi QTL (3169), Lean cuts percentage QTL (808), Backfat at rump QTL (21206), Vertebra number QTL (21301), Loin muscle area QTL (38072), backfat abov…
137	1	275247001	275250500	Average backfat thickness QTL (35), Drip loss QTL (8300), Average backfat thickness QTL (3145), External fat on ham QTL (861), average daily gain QTL (5680), Average backfat thickness QTL (310), White blood cell counts QTL (5456), PH for Longissmus dorsi QTL (3169), Lean cuts percentage QTL (808), Drip loss QTL (7748), Backfat at rump QTL (21206), Vertebra number QTL (21301), Loin muscle area QTL…
138	1	275644501	275648000	Average backfat thickness QTL (35), Drip loss QTL (8300), Average backfat thickness QTL (3145), External fat on ham QTL (861), average daily gain QTL (5680), Average backfat thickness QTL (310), White blood cell counts QTL (5456), PH for Longissmus dorsi QTL (3169), Lean cuts percentage QTL (808), Backfat at rump QTL (21206), Vertebra number QTL (21301), Loin muscle area QTL (38072), backfat abov…
139	1	276868001	276881000	Average backfat thickness QTL (35), Drip loss QTL (8300), Average backfat thickness QTL (3145), External fat on ham QTL (861), average daily gain QTL (5680), Average backfat thickness QTL (310), White blood cell counts QTL (5456), PH for Longissmus dorsi QTL (3169), Lean cuts percentage QTL (808), Backfat at rump QTL (21206), Vertebra number QTL (21301), Loin muscle area QTL (38072), backfat abov…
140	1	277576001	277586500	Average backfat thickness QTL (35), Drip loss QTL (8300), Average backfat thickness QTL (3145), External fat on ham QTL (861), average daily gain QTL (5680), White blood cell counts QTL (5456), PH for Longissmus dorsi QTL (3169), Lean cuts percentage QTL (808), Backfat at rump QTL (21206), Vertebra number QTL (21301), Loin muscle area QTL (38072), backfat above muscle dorsi QTL (5237), Thoracic v…
141	1	277657001	277680000	Average backfat thickness QTL (35), Drip loss QTL (8300), Average backfat thickness QTL (3145), External fat on ham QTL (861), average daily gain QTL (5680), White blood cell counts QTL (5456), PH for Longissmus dorsi QTL (3169), Lean cuts percentage QTL (808), Backfat at rump QTL (21206), Vertebra number QTL (21301), Loin muscle area QTL (38072), backfat above muscle dorsi QTL (5237), Thoracic v…
142	1	277874001	277894000	Average backfat thickness QTL (35), Drip loss QTL (8300), Average backfat thickness QTL (3145), External fat on ham QTL (861), average daily gain QTL (5680), White blood cell counts QTL (5456), PH for Longissmus dorsi QTL (3169), Lean cuts percentage QTL (808), Backfat at rump QTL (21206), Vertebra number QTL (21301), Loin muscle area QTL (38072), backfat above muscle dorsi QTL (5237), Thoracic v…
143	1	278062501	278068000	Average backfat thickness QTL (35), Drip loss QTL (8300), Average backfat thickness QTL (3145), External fat on ham QTL (861), average daily gain QTL (5680), White blood cell counts QTL (5456), PH for Longissmus dorsi QTL (3169), Lean cuts percentage QTL (808), Backfat at rump QTL (21206), Vertebra number QTL (21301), Loin muscle area QTL (38072), backfat above muscle dorsi QTL (5237), Thoracic v…
144	1	284015001	284020000	Average backfat thickness QTL (35), Left teat number QTL (6463), Fat to meat ratio QTL (12739), Drip loss QTL (8300), Lean meat percentage QTL (824), Average backfat thickness QTL (3145), average daily gain QTL (5680), Fat-cuts percentage QTL (12727), PH for Longissmus dorsi QTL (3169), Backfat at rump QTL (21206), Vertebra number QTL (21301), Loin muscle area QTL (38072), backfat above muscle do…
145	1	284429001	284533500	Average backfat thickness QTL (35), Left teat number QTL (6463), Fat to meat ratio QTL (12739), Drip loss QTL (8300), Lean meat percentage QTL (824), Average backfat thickness QTL (3145), average daily gain QTL (5680), Fat-cuts percentage QTL (12727), PH for Longissmus dorsi QTL (3169), Backfat at rump QTL (21206), Vertebra number QTL (21301), Loin muscle area QTL (38072), backfat above muscle do…
146	1	285126501	285132000	Average backfat thickness QTL (35), Fat to meat ratio QTL (12739), Drip loss QTL (8300), Lean meat percentage QTL (824), Average backfat thickness QTL (3145), average daily gain QTL (5680), Fat-cuts percentage QTL (12727), PH for Longissmus dorsi QTL (3169), Backfat at rump QTL (21206), Vertebra number QTL (21301), Loin muscle area QTL (38072), backfat above muscle dorsi QTL (5237), Thoracic vert…
147	1	285221001	285243500	Average backfat thickness QTL (35), Fat to meat ratio QTL (12739), Drip loss QTL (8300), Lean meat percentage QTL (824), Average backfat thickness QTL (3145), average daily gain QTL (5680), Fat-cuts percentage QTL (12727), PH for Longissmus dorsi QTL (3169), Backfat at rump QTL (21206), Vertebra number QTL (21301), Loin muscle area QTL (38072), backfat above muscle dorsi QTL (5237), Thoracic vert…
148	1	285240001	285243500	Average backfat thickness QTL (35), Fat to meat ratio QTL (12739), Drip loss QTL (8300), Lean meat percentage QTL (824), Average backfat thickness QTL (3145), average daily gain QTL (5680), Fat-cuts percentage QTL (12727), PH for Longissmus dorsi QTL (3169), Backfat at rump QTL (21206), Vertebra number QTL (21301), Loin muscle area QTL (38072), backfat above muscle dorsi QTL (5237), Thoracic vert…
149	1	285893501	285901000	Average backfat thickness QTL (35), Fat to meat ratio QTL (12739), Drip loss QTL (8300), Lean meat percentage QTL (824), Average backfat thickness QTL (3145), average daily gain QTL (5680), Fat-cuts percentage QTL (12727), PH for Longissmus dorsi QTL (3169), Backfat at rump QTL (21206), Vertebra number QTL (21301), Loin muscle area QTL (38072), backfat above muscle dorsi QTL (5237), Thoracic vert…
150	1	287869001	287871000	Average backfat thickness QTL (35), Fat to meat ratio QTL (12739), Drip loss QTL (8300), Lean meat percentage QTL (824), backfat at last rib QTL (3666), Average backfat thickness QTL (3145), average daily gain QTL (5680), Fat-cuts percentage QTL (12727), PH for Longissmus dorsi QTL (3169), Backfat at rump QTL (21206), Vertebra number QTL (21301), Loin muscle area QTL (38072), backfat above muscle…
151	1	292581001	292597000	Average backfat thickness QTL (35), Fat to meat ratio QTL (12739), Drip loss QTL (8300), Lean meat percentage QTL (824), backfat at last rib QTL (3666), Average backfat thickness QTL (3145), average daily gain QTL (5680), Fat-cuts percentage QTL (12727), PH for Longissmus dorsi QTL (3169), Loin muscle area QTL (38072), backfat above muscle dorsi QTL (5237), average daily gain QTL (448), Backfat w…
152	1	292622501	292639000	Average backfat thickness QTL (35), Fat to meat ratio QTL (12739), Drip loss QTL (8300), Lean meat percentage QTL (824), backfat at last rib QTL (3666), Average backfat thickness QTL (3145), average daily gain QTL (5680), Fat-cuts percentage QTL (12727), PH for Longissmus dorsi QTL (3169), Loin muscle area QTL (38072), backfat above muscle dorsi QTL (5237), average daily gain QTL (448), Backfat w…
153	1	292644001	292650000	Average backfat thickness QTL (35), Fat to meat ratio QTL (12739), Drip loss QTL (8300), Lean meat percentage QTL (824), backfat at last rib QTL (3666), Average backfat thickness QTL (3145), average daily gain QTL (5680), Fat-cuts percentage QTL (12727), PH for Longissmus dorsi QTL (3169), Loin muscle area QTL (38072), backfat above muscle dorsi QTL (5237), average daily gain QTL (448), Backfat w…
154	1	293292001	293300500	Average backfat thickness QTL (35), Fat to meat ratio QTL (12739), Drip loss QTL (8300), Lean meat percentage QTL (824), Average backfat thickness QTL (3145), Fat-cuts percentage QTL (12727), PH for Longissmus dorsi QTL (3169), Backfat weight QTL (3149), Ham weight QTL (3148), Drip loss QTL (8131), Drip loss QTL (8323), backfat at last rib QTL (16833), Average backfat thickness QTL (192), body we…
155	1	293875501	293884000	Average backfat thickness QTL (35), Fat to meat ratio QTL (12739), Drip loss QTL (8300), Lean meat percentage QTL (824), Average backfat thickness QTL (3145), Fat-cuts percentage QTL (12727), PH for Longissmus dorsi QTL (3169), Backfat weight QTL (3149), Ham weight QTL (3148), Drip loss QTL (8131), Drip loss QTL (8323), backfat at last rib QTL (16833), body weight (17 weeks) QTL (662), Drip loss …
156	1	293963501	293978000	Average backfat thickness QTL (35), Fat to meat ratio QTL (12739), Drip loss QTL (8300), Lean meat percentage QTL (824), Average backfat thickness QTL (3145), Fat-cuts percentage QTL (12727), PH for Longissmus dorsi QTL (3169), Backfat weight QTL (3149), Ham weight QTL (3148), Drip loss QTL (8131), Drip loss QTL (8323), backfat at last rib QTL (16833), body weight (17 weeks) QTL (662), Drip loss …
157	1	294016001	294025500	Average backfat thickness QTL (35), Fat to meat ratio QTL (12739), Drip loss QTL (8300), Lean meat percentage QTL (824), Average backfat thickness QTL (3145), Fat-cuts percentage QTL (12727), PH for Longissmus dorsi QTL (3169), Backfat weight QTL (3149), Ham weight QTL (3148), Drip loss QTL (8131), Drip loss QTL (8323), backfat at last rib QTL (16833), body weight (17 weeks) QTL (662), Drip loss …
158	1	294872001	294878000	Average backfat thickness QTL (35), Drip loss QTL (8300), Average backfat thickness QTL (3145), PH for Longissmus dorsi QTL (3169), Backfat weight QTL (3149), Ham weight QTL (3148), Drip loss QTL (8131), Drip loss QTL (8323), body weight (17 weeks) QTL (662), Leaf fat weight QTL (402), Drip loss QTL (8382), Drip loss QTL (8564), backfat at last rib QTL (27), Drip loss QTL (80), Lean meat percenta…
159	1	295171001	295184000	Average backfat thickness QTL (35), Drip loss QTL (8300), Average backfat thickness QTL (3145), PH for Longissmus dorsi QTL (3169), Backfat weight QTL (3149), Ham weight QTL (3148), Drip loss QTL (8131), Drip loss QTL (8323), body weight (17 weeks) QTL (662), Leaf fat weight QTL (402), Drip loss QTL (8382), Drip loss QTL (8564), backfat at last rib QTL (27), Drip loss QTL (80), Lean meat percenta…
160	1	295213501	295216500	Average backfat thickness QTL (35), Drip loss QTL (8300), Average backfat thickness QTL (3145), PH for Longissmus dorsi QTL (3169), Backfat weight QTL (3149), Ham weight QTL (3148), Drip loss QTL (8131), Drip loss QTL (8323), body weight (17 weeks) QTL (662), Leaf fat weight QTL (402), Drip loss QTL (8382), Drip loss QTL (8564), backfat at last rib QTL (27), Drip loss QTL (80), Lean meat percenta…
161	1	295285501	295292000	Average backfat thickness QTL (35), Drip loss QTL (8300), Average backfat thickness QTL (3145), PH for Longissmus dorsi QTL (3169), Backfat weight QTL (3149), Ham weight QTL (3148), Drip loss QTL (8131), Drip loss QTL (8323), body weight (17 weeks) QTL (662), Leaf fat weight QTL (402), Drip loss QTL (8382), Drip loss QTL (8564), backfat at last rib QTL (27), Drip loss QTL (80), Lean meat percenta…
162	1	295299001	295302000	Average backfat thickness QTL (35), Drip loss QTL (8300), Average backfat thickness QTL (3145), PH for Longissmus dorsi QTL (3169), Backfat weight QTL (3149), Ham weight QTL (3148), Drip loss QTL (8131), Drip loss QTL (8323), body weight (17 weeks) QTL (662), Leaf fat weight QTL (402), Drip loss QTL (8382), Drip loss QTL (8564), backfat at last rib QTL (27), Drip loss QTL (80), Lean meat percenta…
163	1	295295501	295306500	Average backfat thickness QTL (35), Drip loss QTL (8300), Average backfat thickness QTL (3145), PH for Longissmus dorsi QTL (3169), Backfat weight QTL (3149), Ham weight QTL (3148), Drip loss QTL (8131), Drip loss QTL (8323), body weight (17 weeks) QTL (662), Leaf fat weight QTL (402), Drip loss QTL (8382), Drip loss QTL (8564), backfat at last rib QTL (27), Drip loss QTL (80), Lean meat percenta…
164	1	295360501	295370500	Average backfat thickness QTL (35), Drip loss QTL (8300), Average backfat thickness QTL (3145), PH for Longissmus dorsi QTL (3169), Backfat weight QTL (3149), Ham weight QTL (3148), Drip loss QTL (8131), Drip loss QTL (8323), body weight (17 weeks) QTL (662), Leaf fat weight QTL (402), Drip loss QTL (8382), Drip loss QTL (8564), backfat at last rib QTL (27), Drip loss QTL (80), Lean meat percenta…
165	1	295367001	295385000	Average backfat thickness QTL (35), Drip loss QTL (8300), Average backfat thickness QTL (3145), PH for Longissmus dorsi QTL (3169), Backfat weight QTL (3149), Ham weight QTL (3148), Drip loss QTL (8131), Drip loss QTL (8323), body weight (17 weeks) QTL (662), Leaf fat weight QTL (402), Drip loss QTL (8382), Drip loss QTL (8564), backfat at last rib QTL (27), Drip loss QTL (80), Lean meat percenta…
166	1	295382501	295393000	Average backfat thickness QTL (35), Drip loss QTL (8300), Average backfat thickness QTL (3145), PH for Longissmus dorsi QTL (3169), Backfat weight QTL (3149), Ham weight QTL (3148), Drip loss QTL (8131), Drip loss QTL (8323), body weight (17 weeks) QTL (662), Leaf fat weight QTL (402), Drip loss QTL (8382), Drip loss QTL (8564), backfat at last rib QTL (27), Drip loss QTL (80), Lean meat percenta…
167	1	295393501	295405000	Average backfat thickness QTL (35), Drip loss QTL (8300), Average backfat thickness QTL (3145), PH for Longissmus dorsi QTL (3169), Backfat weight QTL (3149), Ham weight QTL (3148), Drip loss QTL (8131), Drip loss QTL (8323), body weight (17 weeks) QTL (662), Leaf fat weight QTL (402), Drip loss QTL (8382), Drip loss QTL (8564), backfat at last rib QTL (27), Drip loss QTL (80), Lean meat percenta…
168	1	295404501	295412000	Average backfat thickness QTL (35), Drip loss QTL (8300), Average backfat thickness QTL (3145), PH for Longissmus dorsi QTL (3169), Backfat weight QTL (3149), Ham weight QTL (3148), Drip loss QTL (8131), Drip loss QTL (8323), body weight (17 weeks) QTL (662), Leaf fat weight QTL (402), Drip loss QTL (8382), Drip loss QTL (8564), backfat at last rib QTL (27), Drip loss QTL (80), Lean meat percenta…
169	1	295651001	295657500	Average backfat thickness QTL (35), Drip loss QTL (8300), Average backfat thickness QTL (3145), PH for Longissmus dorsi QTL (3169), Backfat weight QTL (3149), Ham weight QTL (3148), Drip loss QTL (8131), Drip loss QTL (8323), body weight (17 weeks) QTL (662), Leaf fat weight QTL (402), Drip loss QTL (8382), Drip loss QTL (8564), backfat at last rib QTL (27), Drip loss QTL (80), Lean meat percenta…
170	1	300990001	300992500	Average backfat thickness QTL (35), Drip loss QTL (8300), Average backfat thickness QTL (3145), PH for Longissmus dorsi QTL (3169), Backfat weight QTL (3149), Loin and ham percentage in carcass QTL (377), Ham weight QTL (3148), Drip loss QTL (8131), Drip loss QTL (8323), body weight (17 weeks) QTL (662), Leaf fat weight QTL (402), Drip loss QTL (8382), Drip loss QTL (8564), backfat at last rib QT…
171	1	304144501	304149500	Average backfat thickness QTL (35), Drip loss QTL (8300), Average backfat thickness QTL (3145), PH for Longissmus dorsi QTL (3169), Backfat weight QTL (3149), Loin and ham percentage in carcass QTL (377), Ham weight QTL (3148), Drip loss QTL (8131), Drip loss QTL (8323), body weight (17 weeks) QTL (662), Leaf fat weight QTL (402), Drip loss QTL (8382), Drip loss QTL (8564), backfat at last rib QT…
172	1	304894501	304899500	Average backfat thickness QTL (35), Drip loss QTL (8300), Average backfat thickness QTL (3145), Platelet count QTL (107312), PH for Longissmus dorsi QTL (3169), Backfat weight QTL (3149), Loin and ham percentage in carcass QTL (377), Ham weight QTL (3148), Drip loss QTL (8131), Drip loss QTL (8323), body weight (17 weeks) QTL (662), Leaf fat weight QTL (402), Drip loss QTL (8382), Drip loss QTL (…
173	1	307505001	307508500	Drip loss QTL (8300), Fat weight (total) QTL (65021), Average backfat thickness QTL (735), Loin and ham percentage in carcass QTL (377), Drip loss QTL (7807), Loin muscle area QTL (759), Drip loss QTL (8131), Drip loss QTL (8323), Drip loss QTL (8068), Body weight (birth) QTL (719), body weight (17 weeks) QTL (662), Drip loss QTL (8064), Leaf fat weight QTL (402), Drip loss QTL (8164), Drip loss …
174	1	307811001	307827500	Drip loss QTL (8300), Fat weight (total) QTL (65021), Drip loss QTL (8131), Drip loss QTL (8323), Leaf fat weight QTL (402), Drip loss QTL (8382), Drip loss QTL (8564), Drip loss QTL (8063), Umbilical hernia QTL (8742), Drip loss QTL (8480), Drip loss QTL (7936), Percentage of backfat and leaf fat in carcass QTL (403), Ham weight QTL (376), Loin weight QTL (375), Drip loss QTL (8602)
175	1	307984501	307999000	Drip loss QTL (8300), Fat weight (total) QTL (65021), Drip loss QTL (8131), Drip loss QTL (8323), Leaf fat weight QTL (402), Drip loss QTL (8382), Drip loss QTL (8564), Drip loss QTL (8063), Umbilical hernia QTL (8742), Drip loss QTL (8480), Drip loss QTL (7936), Percentage of backfat and leaf fat in carcass QTL (403), Ham weight QTL (376), Loin weight QTL (375), Drip loss QTL (8602)
176	1	311330001	311336000	Drip loss QTL (8162), Drip loss QTL (7837), Drip loss QTL (7964), Drip loss QTL (7862), Leaf fat weight QTL (402), Umbilical hernia QTL (8742), Drip loss QTL (8563), Percentage of backfat and leaf fat in carcass QTL (403), Drip loss QTL (8008), Ham weight QTL (376), Fat percentage in carcass QTL (65022), Loin weight QTL (375)
177	1	312717001	312723500	Percentage of backfat and leaf fat in carcass QTL (403)
178	1	312916501	312920500	Percentage of backfat and leaf fat in carcass QTL (403)
179	1	313102001	313106000	Percentage of backfat and leaf fat in carcass QTL (403)
180	1	314266001	314278500	Percentage of backfat and leaf fat in carcass QTL (403)
181	1	314426001	314430500	Percentage of backfat and leaf fat in carcass QTL (403)
182	1	314429501	314446000	Percentage of backfat and leaf fat in carcass QTL (403)
183	1	314616501	314631000	Percentage of backfat and leaf fat in carcass QTL (403)
184	1	315044501	315053000	Percentage of backfat and leaf fat in carcass QTL (403)
185	1	315107501	315111500	Percentage of backfat and leaf fat in carcass QTL (403)
186	1	315138001	315144500	Percentage of backfat and leaf fat in carcass QTL (403)
187	1	4271501	4277500	Loin muscle area QTL (38072), Body weight (birth) QTL (826), Loin muscle area QTL (21352), Marbling QTL (38049), Loin muscle area QTL (3221), Muscle moisture percentage QTL (38073), Glucose level QTL (15087), Diameter of angular fibers QTL (2793), Teat number QTL (276), Loin fat percentage QTL (38050)
188	1	5213501	5218000	Loin muscle area QTL (38072), Body weight (birth) QTL (826), Loin muscle area QTL (21352), Marbling QTL (38049), Loin muscle area QTL (3221), Muscle moisture percentage QTL (38073), Glucose level QTL (15087), Diameter of angular fibers QTL (2793), Teat number QTL (276), Loin fat percentage QTL (38050)
189	1	5438501	5442000	Loin muscle area QTL (38072), Body weight (birth) QTL (826), Loin muscle area QTL (21352), Marbling QTL (38049), Loin muscle area QTL (3221), Muscle moisture percentage QTL (38073), Glucose level QTL (15087), Diameter of angular fibers QTL (2793), Teat number QTL (276), Loin fat percentage QTL (38050)
190	1	5534501	5542500	Loin muscle area QTL (38072), Body weight (birth) QTL (826), Loin muscle area QTL (21352), Marbling QTL (38049), Loin muscle area QTL (3221), Muscle moisture percentage QTL (38073), Glucose level QTL (15087), Diameter of angular fibers QTL (2793), Teat number QTL (276), Loin fat percentage QTL (38050)
191	1	6319001	6321000	Loin muscle area QTL (38072), Body weight (birth) QTL (826), Loin muscle area QTL (21352), Marbling QTL (38049), Loin muscle area QTL (3221), Muscle moisture percentage QTL (38073), Glucose level QTL (15087), Diameter of angular fibers QTL (2793), Removal parity QTL (15990), Teat number QTL (276), Loin fat percentage QTL (38050)
192	1	8572501	8578500	average daily gain QTL (5680), Loin muscle area QTL (38072), Body weight (birth) QTL (826), Loin muscle area QTL (21352), Musculus gluteus weight QTL (1276), Stearic acid content QTL (3111), Marbling QTL (38049), Shoulder subcutaneous fat thickness QTL (5671), Loin muscle area QTL (3221), Muscle moisture percentage QTL (38073), Stearic acid content QTL (3119), Glucose level QTL (15087), Diameter …
193	1	8580001	8585500	average daily gain QTL (5680), Loin muscle area QTL (38072), Body weight (birth) QTL (826), Loin muscle area QTL (21352), Musculus gluteus weight QTL (1276), Stearic acid content QTL (3111), Marbling QTL (38049), Shoulder subcutaneous fat thickness QTL (5671), Loin muscle area QTL (3221), Muscle moisture percentage QTL (38073), Stearic acid content QTL (3119), Glucose level QTL (15087), Diameter …
194	1	8612501	8630000	average daily gain QTL (5680), Loin muscle area QTL (38072), Body weight (birth) QTL (826), Loin muscle area QTL (21352), Musculus gluteus weight QTL (1276), Stearic acid content QTL (3111), Marbling QTL (38049), Shoulder subcutaneous fat thickness QTL (5671), Loin muscle area QTL (3221), Muscle moisture percentage QTL (38073), Stearic acid content QTL (3119), Glucose level QTL (15087), Diameter …
195	1	9106501	9112500	average daily gain QTL (5680), Loin muscle area QTL (38072), CIE-a* QTL (28043), Body weight (birth) QTL (826), Loin muscle area QTL (21352), Musculus gluteus weight QTL (1276), Stearic acid content QTL (3111), Plateletcrit QTL (107303), Marbling QTL (38049), Shoulder subcutaneous fat thickness QTL (5671), Loin muscle area QTL (3221), Platelet count QTL (107311), Muscle moisture percentage QTL (3…
196	1	9139501	9145500	average daily gain QTL (5680), Loin muscle area QTL (38072), CIE-a* QTL (28043), Body weight (birth) QTL (826), Loin muscle area QTL (21352), Musculus gluteus weight QTL (1276), Stearic acid content QTL (3111), Plateletcrit QTL (107303), Marbling QTL (38049), Shoulder subcutaneous fat thickness QTL (5671), Loin muscle area QTL (3221), Platelet count QTL (107311), Muscle moisture percentage QTL (3…
197	1	22781501	22789000	average daily gain QTL (5680), Drip loss QTL (8043), muscle protein percentage QTL (3838), Loin muscle area QTL (38072), backfat above muscle dorsi QTL (5237), average daily gain QTL (338), White blood cell counts QTL (15047), PH for Longissmus dorsi QTL (2787), backfat at last rib QTL (5674), CIE-a* QTL (3980), Drip loss QTL (8349), Estimated carcass lean content QTL (5678), Marbling QTL (38049)…
198	1	22931501	22941000	average daily gain QTL (5680), Drip loss QTL (8043), muscle protein percentage QTL (3838), Loin muscle area QTL (38072), backfat above muscle dorsi QTL (5237), average daily gain QTL (338), White blood cell counts QTL (15047), PH for Longissmus dorsi QTL (2787), backfat at last rib QTL (5674), CIE-a* QTL (3980), Drip loss QTL (8349), Estimated carcass lean content QTL (5678), Marbling QTL (38049)…
199	1	22936001	22941500	average daily gain QTL (5680), Drip loss QTL (8043), muscle protein percentage QTL (3838), Loin muscle area QTL (38072), backfat above muscle dorsi QTL (5237), average daily gain QTL (338), White blood cell counts QTL (15047), PH for Longissmus dorsi QTL (2787), backfat at last rib QTL (5674), CIE-a* QTL (3980), Drip loss QTL (8349), Estimated carcass lean content QTL (5678), Marbling QTL (38049)…
200	1	24571001	24575000	average daily gain QTL (5680), Drip loss QTL (8043), muscle protein percentage QTL (3838), Loin muscle area QTL (38072), backfat above muscle dorsi QTL (5237), average daily gain QTL (338), White blood cell counts QTL (15047), Conductivity 24 hours post-mortem QTL (21551), PH for Longissmus dorsi QTL (2787), backfat at last rib QTL (5674), CIE-a* QTL (3980), Drip loss QTL (8349), Estimated carcas…
201	1	24993001	24995500	average daily gain QTL (5680), Drip loss QTL (8043), muscle protein percentage QTL (3838), Loin muscle area QTL (46), Loin muscle area QTL (38072), Carcass weight (hot) QTL (16896), backfat above muscle dorsi QTL (5237), average daily gain QTL (338), White blood cell counts QTL (15047), PH for Longissmus dorsi QTL (2787), backfat at last rib QTL (5674), CIE-a* QTL (3980), Drip loss QTL (8349), Es…
202	1	33290501	33292500	average daily gain QTL (5680), Drip loss QTL (8043), muscle protein percentage QTL (3838), Loin muscle area QTL (46), Loin muscle area QTL (38072), Carcass weight (hot) QTL (16896), backfat above muscle dorsi QTL (5237), average daily gain QTL (338), White blood cell counts QTL (15047), PH for Longissmus dorsi QTL (2787), backfat at last rib QTL (5674), CIE-a* QTL (3980), Drip loss QTL (8349), Es…
203	1	33519001	33523000	average daily gain QTL (5680), Drip loss QTL (8043), muscle protein percentage QTL (3838), Loin muscle area QTL (46), Loin muscle area QTL (38072), Carcass weight (hot) QTL (16896), backfat above muscle dorsi QTL (5237), average daily gain QTL (338), White blood cell counts QTL (15047), PH for Longissmus dorsi QTL (2787), backfat at last rib QTL (5674), CIE-a* QTL (3980), Drip loss QTL (8349), Es…
204	1	33942001	33948500	average daily gain QTL (5680), Drip loss QTL (8043), muscle protein percentage QTL (3838), Loin muscle area QTL (46), Loin muscle area QTL (38072), Carcass weight (hot) QTL (16896), backfat above muscle dorsi QTL (5237), average daily gain QTL (338), White blood cell counts QTL (15047), PH for Longissmus dorsi QTL (2787), backfat at last rib QTL (5674), CIE-a* QTL (3980), Drip loss QTL (8349), Es…
205	1	34009501	34016000	average daily gain QTL (5680), Drip loss QTL (8043), muscle protein percentage QTL (3838), Loin muscle area QTL (46), Loin muscle area QTL (38072), Carcass weight (hot) QTL (16896), backfat above muscle dorsi QTL (5237), average daily gain QTL (338), White blood cell counts QTL (15047), PH for Longissmus dorsi QTL (2787), backfat at last rib QTL (5674), CIE-a* QTL (3980), Meat color-a QTL (12649)…
206	1	34014501	34026500	average daily gain QTL (5680), Drip loss QTL (8043), muscle protein percentage QTL (3838), Loin muscle area QTL (46), Loin muscle area QTL (38072), Carcass weight (hot) QTL (16896), backfat above muscle dorsi QTL (5237), average daily gain QTL (338), White blood cell counts QTL (15047), PH for Longissmus dorsi QTL (2787), backfat at last rib QTL (5674), CIE-a* QTL (3980), Meat color-a QTL (12649)…
207	1	34642501	34646500	average daily gain QTL (5680), Drip loss QTL (8043), muscle protein percentage QTL (3838), Loin muscle area QTL (46), Loin muscle area QTL (38072), Carcass weight (hot) QTL (16896), backfat above muscle dorsi QTL (5237), average daily gain QTL (338), White blood cell counts QTL (15047), PH for Longissmus dorsi QTL (2787), backfat at last rib QTL (5674), CIE-a* QTL (3980), Drip loss QTL (8349), Es…
208	1	36509501	36513500	Drip loss QTL (7828), average daily gain QTL (5680), Drip loss QTL (8043), Estimated carcass lean content QTL (5960), muscle protein percentage QTL (3838), CD2-positive leukocyte number QTL (4260), Drip loss QTL (8597), Loin and neck meat weight QTL (807), Loin muscle area QTL (46), Carcass weight (cold) QTL (792), Loin muscle area QTL (38072), Carcass weight (cold) QTL (12710), Carcass weight (h…
209	1	37229001	37237500	Drip loss QTL (7828), average daily gain QTL (5680), Drip loss QTL (8043), Estimated carcass lean content QTL (5960), muscle protein percentage QTL (3838), CD2-positive leukocyte number QTL (4260), Drip loss QTL (8597), Loin and neck meat weight QTL (807), Loin muscle area QTL (46), Carcass weight (cold) QTL (792), Loin muscle area QTL (38072), Carcass weight (cold) QTL (12710), Carcass weight (h…
210	1	37247501	37266500	Drip loss QTL (7828), average daily gain QTL (5680), Drip loss QTL (8043), Estimated carcass lean content QTL (5960), muscle protein percentage QTL (3838), CD2-positive leukocyte number QTL (4260), Drip loss QTL (8597), Loin and neck meat weight QTL (807), Loin muscle area QTL (46), Carcass weight (cold) QTL (792), Loin muscle area QTL (38072), Carcass weight (cold) QTL (12710), Carcass weight (h…
211	1	46745001	46749500	average daily gain QTL (5680), Drip loss QTL (8043), Estimated carcass lean content QTL (5960), muscle protein percentage QTL (3838), CD2-positive leukocyte number QTL (4260), Loin and neck meat weight QTL (807), Loin muscle area QTL (46), Carcass weight (cold) QTL (792), Backfat at rump QTL (21206), Loin muscle area QTL (38072), Carcass weight (cold) QTL (12710), Carcass weight (hot) QTL (16896)…
212	1	46760501	46791500	average daily gain QTL (5680), Drip loss QTL (8043), Estimated carcass lean content QTL (5960), muscle protein percentage QTL (3838), CD2-positive leukocyte number QTL (4260), Loin and neck meat weight QTL (807), Loin muscle area QTL (46), Carcass weight (cold) QTL (792), Backfat at rump QTL (21206), Loin muscle area QTL (38072), Carcass weight (cold) QTL (12710), Carcass weight (hot) QTL (16896)…
213	1	46797501	46807000	average daily gain QTL (5680), Drip loss QTL (8043), Estimated carcass lean content QTL (5960), muscle protein percentage QTL (3838), CD2-positive leukocyte number QTL (4260), Loin and neck meat weight QTL (807), Loin muscle area QTL (46), Carcass weight (cold) QTL (792), Backfat at rump QTL (21206), Loin muscle area QTL (38072), Carcass weight (cold) QTL (12710), Carcass weight (hot) QTL (16896)…
214	1	46828001	46858500	average daily gain QTL (5680), Drip loss QTL (8043), Estimated carcass lean content QTL (5960), muscle protein percentage QTL (3838), CD2-positive leukocyte number QTL (4260), Loin and neck meat weight QTL (807), Loin muscle area QTL (46), Carcass weight (cold) QTL (792), Backfat at rump QTL (21206), Loin muscle area QTL (38072), Carcass weight (cold) QTL (12710), Carcass weight (hot) QTL (16896)…
215	1	46973501	46977500	average daily gain QTL (5680), Drip loss QTL (8043), Estimated carcass lean content QTL (5960), muscle protein percentage QTL (3838), CD2-positive leukocyte number QTL (4260), Loin and neck meat weight QTL (807), Loin muscle area QTL (46), Carcass weight (cold) QTL (792), Backfat at rump QTL (21206), Loin muscle area QTL (38072), Carcass weight (cold) QTL (12710), Carcass weight (hot) QTL (16896)…
216	1	47171501	47222500	average daily gain QTL (5680), Drip loss QTL (8043), Estimated carcass lean content QTL (5960), muscle protein percentage QTL (3838), CD2-positive leukocyte number QTL (4260), Loin and neck meat weight QTL (807), Loin muscle area QTL (46), Carcass weight (cold) QTL (792), Backfat at rump QTL (21206), Loin muscle area QTL (38072), Carcass weight (cold) QTL (12710), Carcass weight (hot) QTL (16896)…
217	1	48295501	48303500	average daily gain QTL (5680), Drip loss QTL (8043), Estimated carcass lean content QTL (5960), muscle protein percentage QTL (3838), CD2-positive leukocyte number QTL (4260), Loin and neck meat weight QTL (807), Loin muscle area QTL (46), Carcass weight (cold) QTL (792), Backfat at rump QTL (21206), Loin muscle area QTL (38072), Carcass weight (cold) QTL (12710), Carcass weight (hot) QTL (16896)…
218	1	48485501	48488000	average daily gain QTL (5680), Drip loss QTL (8043), Estimated carcass lean content QTL (5960), muscle protein percentage QTL (3838), CD2-positive leukocyte number QTL (4260), Loin and neck meat weight QTL (807), Loin muscle area QTL (46), Carcass weight (cold) QTL (792), Backfat at rump QTL (21206), Loin muscle area QTL (38072), Carcass weight (cold) QTL (12710), Carcass weight (hot) QTL (16896)…
219	1	48485501	48495000	average daily gain QTL (5680), Drip loss QTL (8043), Estimated carcass lean content QTL (5960), muscle protein percentage QTL (3838), CD2-positive leukocyte number QTL (4260), Loin and neck meat weight QTL (807), Loin muscle area QTL (46), Carcass weight (cold) QTL (792), Backfat at rump QTL (21206), Loin muscle area QTL (38072), Carcass weight (cold) QTL (12710), Carcass weight (hot) QTL (16896)…
220	1	48845501	48849500	average daily gain QTL (5680), Drip loss QTL (8043), Estimated carcass lean content QTL (5960), muscle protein percentage QTL (3838), Drip loss QTL (8423), CD2-positive leukocyte number QTL (4260), Drip loss QTL (7797), Loin and neck meat weight QTL (807), Loin muscle area QTL (46), Carcass weight (cold) QTL (792), Backfat at rump QTL (21206), Loin muscle area QTL (38072), Carcass weight (cold) Q…
221	1	51756001	51763500	average daily gain QTL (5680), Drip loss QTL (8043), Estimated carcass lean content QTL (5960), muscle protein percentage QTL (3838), CD2-positive leukocyte number QTL (4260), Loin and neck meat weight QTL (807), Loin muscle area QTL (46), Carcass weight (cold) QTL (792), Backfat at rump QTL (21206), Loin muscle area QTL (38072), Carcass weight (cold) QTL (12710), Carcass weight (hot) QTL (16896)…
222	1	68813501	68819500	Liver weight QTL (13265), average daily gain QTL (5680), Drip loss QTL (8043), Potassium level QTL (6380), Estimated carcass lean content QTL (5960), CD2-positive leukocyte number QTL (4260), backfat at P2 position QTL (4107), average daily gain QTL (3673), Backfat at rump QTL (21206), Loin muscle area QTL (38072), backfat above muscle dorsi QTL (5237), Feed intake QTL (871), White blood cell cou…
223	1	71218501	71223500	Liver weight QTL (13265), average daily gain QTL (5680), Drip loss QTL (8043), Potassium level QTL (6380), Estimated carcass lean content QTL (5960), CD2-positive leukocyte number QTL (4260), backfat at P2 position QTL (4107), average daily gain QTL (3673), Backfat at rump QTL (21206), Loin muscle area QTL (38072), backfat above muscle dorsi QTL (5237), Feed intake QTL (871), White blood cell cou…
224	1	71510501	71513500	Liver weight QTL (13265), average daily gain QTL (5680), Drip loss QTL (8043), Potassium level QTL (6380), Estimated carcass lean content QTL (5960), CD2-positive leukocyte number QTL (4260), backfat at P2 position QTL (4107), average daily gain QTL (3673), Backfat at rump QTL (21206), Loin muscle area QTL (38072), backfat above muscle dorsi QTL (5237), Feed intake QTL (871), White blood cell cou…
225	1	89227501	89234500	average daily gain QTL (5680), Drip loss QTL (8043), Potassium level QTL (6380), Estimated carcass lean content QTL (5960), CD2-positive leukocyte number QTL (4260), backfat at P2 position QTL (4107), average daily gain QTL (3673), Backfat at rump QTL (21206), Loin muscle area QTL (38072), backfat above muscle dorsi QTL (5237), Ear weight QTL (8853), Feed intake QTL (871), White blood cell counts…
226	1	97658001	97672500	Drip loss QTL (7766), average daily gain QTL (5680), Drip loss QTL (8043), Potassium level QTL (6380), Estimated carcass lean content QTL (5960), CD2-positive leukocyte number QTL (4260), backfat at P2 position QTL (4107), Drip loss QTL (8450), CIE-L* QTL (4326), average daily gain QTL (3673), Backfat at rump QTL (21206), Loin muscle area QTL (38072), backfat above muscle dorsi QTL (5237), Ear we…
227	1	98617001	98620000	Drip loss QTL (7766), average daily gain QTL (5680), Drip loss QTL (8043), Potassium level QTL (6380), Estimated carcass lean content QTL (5960), CD2-positive leukocyte number QTL (4260), backfat at P2 position QTL (4107), Drip loss QTL (8450), CIE-L* QTL (4326), average daily gain QTL (3673), Backfat at rump QTL (21206), Loin muscle area QTL (38072), backfat above muscle dorsi QTL (5237), Ear we…
228	1	100182001	100190000	Drip loss QTL (7766), average daily gain QTL (5680), Drip loss QTL (8043), Potassium level QTL (6380), Estimated carcass lean content QTL (5960), CD2-positive leukocyte number QTL (4260), backfat at P2 position QTL (4107), Drip loss QTL (8450), CIE-L* QTL (4326), average daily gain QTL (3673), Backfat at rump QTL (21206), Loin muscle area QTL (38072), backfat above muscle dorsi QTL (5237), Ear we…
229	1	130110501	130115500	Drip loss QTL (8300), average daily gain QTL (5680), Potassium level QTL (6380), CD2-positive leukocyte number QTL (4260), backfat at P2 position QTL (4107), pH for Semimembranosus QTL (5665), CIE-L* QTL (4326), average daily gain QTL (3673), Backfat at rump QTL (21206), Loin muscle area QTL (38072), backfat above muscle dorsi QTL (5237), Ear weight QTL (8853), Backfat weight QTL (3171), Feed int…
230	1	133700501	133709500	Drip loss QTL (8300), average daily gain QTL (5680), Potassium level QTL (6380), Fat percentage in carcass QTL (65014), CD2-positive leukocyte number QTL (4260), pH for Semimembranosus QTL (5665), CIE-L* QTL (4326), Backfat at rump QTL (21206), Platelet distribution width QTL (12312), Loin muscle area QTL (38072), backfat above muscle dorsi QTL (5237), Ear weight QTL (8853), Backfat weight QTL (3…
231	1	133740001	133747000	Drip loss QTL (8300), average daily gain QTL (5680), Potassium level QTL (6380), Fat percentage in carcass QTL (65014), CD2-positive leukocyte number QTL (4260), pH for Semimembranosus QTL (5665), CIE-L* QTL (4326), Backfat at rump QTL (21206), Platelet distribution width QTL (12312), Loin muscle area QTL (38072), backfat above muscle dorsi QTL (5237), Ear weight QTL (8853), Backfat weight QTL (3…
232	1	133787501	133802500	Drip loss QTL (8300), average daily gain QTL (5680), Potassium level QTL (6380), Fat percentage in carcass QTL (65014), CD2-positive leukocyte number QTL (4260), pH for Semimembranosus QTL (5665), CIE-L* QTL (4326), Backfat at rump QTL (21206), Platelet distribution width QTL (12312), Loin muscle area QTL (38072), backfat above muscle dorsi QTL (5237), Ear weight QTL (8853), Backfat weight QTL (3…
233	1	133803501	133808000	Drip loss QTL (8300), average daily gain QTL (5680), Potassium level QTL (6380), Fat percentage in carcass QTL (65014), CD2-positive leukocyte number QTL (4260), pH for Semimembranosus QTL (5665), CIE-L* QTL (4326), Backfat at rump QTL (21206), Platelet distribution width QTL (12312), Loin muscle area QTL (38072), backfat above muscle dorsi QTL (5237), Ear weight QTL (8853), Backfat weight QTL (3…
234	1	138498001	138503500	Drip loss QTL (8300), average daily gain QTL (5680), Potassium level QTL (6380), CD2-positive leukocyte number QTL (4260), pH for Semimembranosus QTL (5665), CIE-L* QTL (4326), Backfat at rump QTL (21206), Platelet distribution width QTL (12312), Loin muscle area QTL (38072), backfat above muscle dorsi QTL (5237), Ear weight QTL (8853), Backfat weight QTL (3171), Feed intake QTL (871), White bloo…
235	1	142354501	142356500	Drip loss QTL (8300), average daily gain QTL (5680), Potassium level QTL (6380), CD2-positive leukocyte number QTL (4260), pH for Semimembranosus QTL (5665), Backfat at rump QTL (21206), Platelet distribution width QTL (12312), Loin muscle area QTL (38072), backfat above muscle dorsi QTL (5237), Ear weight QTL (8853), Backfat weight QTL (3171), Feed intake QTL (871), White blood cell counts QTL (…
236	1	147250501	147262000	Drip loss QTL (8300), average daily gain QTL (5680), Potassium level QTL (6380), CD2-positive leukocyte number QTL (4260), pH for Semimembranosus QTL (5665), Backfat at rump QTL (21206), Platelet distribution width QTL (12312), Loin muscle area QTL (38072), backfat above muscle dorsi QTL (5237), Ear weight QTL (8853), Backfat weight QTL (3171), Feed intake QTL (871), White blood cell counts QTL (…
237	1	147629501	147633500	Drip loss QTL (8300), average daily gain QTL (5680), Potassium level QTL (6380), CD2-positive leukocyte number QTL (4260), pH for Semimembranosus QTL (5665), Backfat at rump QTL (21206), Platelet distribution width QTL (12312), Loin muscle area QTL (38072), backfat above muscle dorsi QTL (5237), Ear weight QTL (8853), Backfat weight QTL (3171), Feed intake QTL (871), White blood cell counts QTL (…
238	1	147864001	147872000	Drip loss QTL (8300), average daily gain QTL (5680), Potassium level QTL (6380), CD2-positive leukocyte number QTL (4260), pH for Semimembranosus QTL (5665), Backfat at rump QTL (21206), Platelet distribution width QTL (12312), Loin muscle area QTL (38072), backfat above muscle dorsi QTL (5237), Ear weight QTL (8853), Backfat weight QTL (3171), Feed intake QTL (871), White blood cell counts QTL (…
239	1	159218501	159228500	Drip loss QTL (8300), average daily gain QTL (5680), Potassium level QTL (6380), CD2-positive leukocyte number QTL (4260), Side fat thickness QTL (5958), pH for Semimembranosus QTL (5665), Backfat at rump QTL (21206), Platelet distribution width QTL (12312), Loin muscle area QTL (38072), backfat above muscle dorsi QTL (5237), Ear weight QTL (8853), Backfat weight QTL (3171), Feed intake QTL (871)…
240	1	163171501	163175500	Daily feed intake QTL (141), Drip loss QTL (8300), average daily gain QTL (5680), Potassium level QTL (6380), CD2-positive leukocyte number QTL (4260), Side fat thickness QTL (5958), pH for Semimembranosus QTL (5665), Backfat at tenth rib QTL (138), Backfat at rump QTL (21206), Platelet distribution width QTL (12312), Loin muscle area QTL (38072), backfat above muscle dorsi QTL (5237), Backfat we…
241	1	169393501	169413000	Daily feed intake QTL (141), Drip loss QTL (8300), Backfat weight QTL (12724), average daily gain QTL (5680), Potassium level QTL (6380), CD2-positive leukocyte number QTL (4260), Side fat thickness QTL (5958), pH for Semimembranosus QTL (5665), Head weight QTL (432), Backfat at tenth rib QTL (138), Backfat at rump QTL (21206), Platelet distribution width QTL (12312), Loin muscle area QTL (38072)…
242	1	169452001	169458000	Daily feed intake QTL (141), Drip loss QTL (8300), Backfat weight QTL (12724), average daily gain QTL (5680), Potassium level QTL (6380), CD2-positive leukocyte number QTL (4260), Side fat thickness QTL (5958), pH for Semimembranosus QTL (5665), Head weight QTL (432), Backfat at tenth rib QTL (138), Backfat at rump QTL (21206), Platelet distribution width QTL (12312), Loin muscle area QTL (38072)…
243	1	169500001	169503500	Daily feed intake QTL (141), Drip loss QTL (8300), Backfat weight QTL (12724), average daily gain QTL (5680), Potassium level QTL (6380), CD2-positive leukocyte number QTL (4260), Side fat thickness QTL (5958), pH for Semimembranosus QTL (5665), Head weight QTL (432), Backfat at tenth rib QTL (138), Backfat at rump QTL (21206), Platelet distribution width QTL (12312), Loin muscle area QTL (38072)…
244	1	196907001	196911500	Daily feed intake QTL (141), Drip loss QTL (8300), Average backfat thickness QTL (4016), Backfat weight QTL (12724), average daily gain QTL (5680), Potassium level QTL (6380), CD2-positive leukocyte number QTL (4260), Side fat thickness QTL (5958), pH for Semimembranosus QTL (5665), Head weight QTL (432), Backfat at tenth rib QTL (138), Backfat at rump QTL (21206), Platelet distribution width QTL…
245	1	213671501	213677000	Daily feed intake QTL (141), Drip loss QTL (8300), Backfat weight QTL (12724), average daily gain QTL (5680), Potassium level QTL (6380), CD2-positive leukocyte number QTL (4260), Head weight QTL (432), Backfat at tenth rib QTL (138), Backfat at rump QTL (21206), Platelet distribution width QTL (12312), Loin muscle area QTL (38072), backfat above muscle dorsi QTL (5237), Backfat weight QTL (3171)…
246	1	213789501	213802000	Daily feed intake QTL (141), Drip loss QTL (8300), Backfat weight QTL (12724), average daily gain QTL (5680), Potassium level QTL (6380), CD2-positive leukocyte number QTL (4260), Head weight QTL (432), Backfat at tenth rib QTL (138), Backfat at rump QTL (21206), Platelet distribution width QTL (12312), Loin muscle area QTL (38072), backfat above muscle dorsi QTL (5237), Backfat weight QTL (3171)…
247	1	213977501	213981000	Daily feed intake QTL (141), Drip loss QTL (8300), Backfat weight QTL (12724), average daily gain QTL (5680), Potassium level QTL (6380), CD2-positive leukocyte number QTL (4260), Head weight QTL (432), Backfat at tenth rib QTL (138), Backfat at rump QTL (21206), Platelet distribution width QTL (12312), Loin muscle area QTL (38072), backfat above muscle dorsi QTL (5237), Backfat weight QTL (3171)…
248	1	215284001	215288500	Daily feed intake QTL (141), Drip loss QTL (8300), Backfat weight QTL (12724), average daily gain QTL (5680), Potassium level QTL (6380), CD2-positive leukocyte number QTL (4260), Head weight QTL (432), Backfat at tenth rib QTL (138), Backfat at rump QTL (21206), Platelet distribution width QTL (12312), Loin muscle area QTL (38072), backfat above muscle dorsi QTL (5237), Backfat weight QTL (3171)…
249	1	215337501	215341500	Daily feed intake QTL (141), Drip loss QTL (8300), Backfat weight QTL (12724), average daily gain QTL (5680), Potassium level QTL (6380), CD2-positive leukocyte number QTL (4260), Head weight QTL (432), Backfat at tenth rib QTL (138), Backfat at rump QTL (21206), Platelet distribution width QTL (12312), Loin muscle area QTL (38072), backfat above muscle dorsi QTL (5237), Backfat weight QTL (3171)…
250	1	215349001	215353000	Daily feed intake QTL (141), Drip loss QTL (8300), Backfat weight QTL (12724), average daily gain QTL (5680), Potassium level QTL (6380), CD2-positive leukocyte number QTL (4260), Head weight QTL (432), Backfat at tenth rib QTL (138), Backfat at rump QTL (21206), Platelet distribution width QTL (12312), Loin muscle area QTL (38072), backfat above muscle dorsi QTL (5237), Backfat weight QTL (3171)…
251	1	216252001	216260000	Daily feed intake QTL (141), Drip loss QTL (8300), Backfat weight QTL (12724), average daily gain QTL (5680), Potassium level QTL (6380), CD2-positive leukocyte number QTL (4260), Head weight QTL (432), Backfat at tenth rib QTL (138), Backfat at rump QTL (21206), Platelet distribution width QTL (12312), Loin muscle area QTL (38072), backfat above muscle dorsi QTL (5237), Backfat weight QTL (3171)…
252	1	223840501	223846500	Daily feed intake QTL (141), Drip loss QTL (8300), Ratio of glycolytic muscles weight to ham meat and bone weight QTL (1277), Backfat weight QTL (12724), average daily gain QTL (5680), average daily gain QTL (2847), Potassium level QTL (6380), CD2-positive leukocyte number QTL (4260), Drip loss QTL (7809), average daily gain QTL (2846), Head weight QTL (432), Backfat at tenth rib QTL (138), Backf…
253	1	239043501	239047500	Drip loss QTL (8300), average daily gain QTL (5680), average daily gain QTL (2847), Hind feet conformation QTL (8912), Gestation length QTL (10617), average daily gain QTL (2846), Backfat at rump QTL (21206), Platelet distribution width QTL (12312), Loin muscle area QTL (38072), average daily gain QTL (16887), backfat above muscle dorsi QTL (5237), Fat-cuts percentage QTL (855), Locomotion QTL (4…
254	1	242510001	242522500	Drip loss QTL (8300), average daily gain QTL (5680), average daily gain QTL (2847), Hind feet conformation QTL (8912), Gestation length QTL (10617), average daily gain QTL (2846), Backfat at rump QTL (21206), Loin muscle area QTL (38072), average daily gain QTL (16887), backfat above muscle dorsi QTL (5237), Fat-cuts percentage QTL (855), Locomotion QTL (478), White blood cell counts QTL (15047),…
255	1	242519001	242527000	Drip loss QTL (8300), average daily gain QTL (5680), average daily gain QTL (2847), Hind feet conformation QTL (8912), Gestation length QTL (10617), average daily gain QTL (2846), Backfat at rump QTL (21206), Loin muscle area QTL (38072), average daily gain QTL (16887), backfat above muscle dorsi QTL (5237), Fat-cuts percentage QTL (855), Locomotion QTL (478), White blood cell counts QTL (15047),…
256	1	242528001	242539000	Drip loss QTL (8300), average daily gain QTL (5680), average daily gain QTL (2847), Hind feet conformation QTL (8912), Gestation length QTL (10617), average daily gain QTL (2846), Backfat at rump QTL (21206), Loin muscle area QTL (38072), average daily gain QTL (16887), backfat above muscle dorsi QTL (5237), Fat-cuts percentage QTL (855), Locomotion QTL (478), White blood cell counts QTL (15047),…
257	1	242543001	242546500	Drip loss QTL (8300), average daily gain QTL (5680), average daily gain QTL (2847), Hind feet conformation QTL (8912), Gestation length QTL (10617), average daily gain QTL (2846), Backfat at rump QTL (21206), Loin muscle area QTL (38072), average daily gain QTL (16887), backfat above muscle dorsi QTL (5237), Fat-cuts percentage QTL (855), Locomotion QTL (478), White blood cell counts QTL (15047),…
258	1	242578001	242583000	Drip loss QTL (8300), average daily gain QTL (5680), average daily gain QTL (2847), Hind feet conformation QTL (8912), Gestation length QTL (10617), average daily gain QTL (2846), Backfat at rump QTL (21206), Loin muscle area QTL (38072), average daily gain QTL (16887), backfat above muscle dorsi QTL (5237), Fat-cuts percentage QTL (855), Locomotion QTL (478), White blood cell counts QTL (15047),…
259	1	242583001	242589000	Drip loss QTL (8300), average daily gain QTL (5680), average daily gain QTL (2847), Hind feet conformation QTL (8912), Gestation length QTL (10617), average daily gain QTL (2846), Backfat at rump QTL (21206), Loin muscle area QTL (38072), average daily gain QTL (16887), backfat above muscle dorsi QTL (5237), Fat-cuts percentage QTL (855), Locomotion QTL (478), White blood cell counts QTL (15047),…
260	1	242659501	242666000	Drip loss QTL (8300), average daily gain QTL (5680), average daily gain QTL (2847), Hind feet conformation QTL (8912), Gestation length QTL (10617), average daily gain QTL (2846), Backfat at rump QTL (21206), Loin muscle area QTL (38072), average daily gain QTL (16887), backfat above muscle dorsi QTL (5237), Fat-cuts percentage QTL (855), Locomotion QTL (478), White blood cell counts QTL (15047),…
261	1	243766501	243770500	Drip loss QTL (8300), average daily gain QTL (5680), average daily gain QTL (2847), Hind feet conformation QTL (8912), Gestation length QTL (10617), average daily gain QTL (2846), Backfat at rump QTL (21206), Loin muscle area QTL (38072), average daily gain QTL (16887), backfat above muscle dorsi QTL (5237), Fat-cuts percentage QTL (855), Locomotion QTL (478), White blood cell counts QTL (15047),…
262	1	259431501	259434500	Drip loss QTL (8300), Drip loss QTL (8522), average daily gain QTL (5680), average daily gain QTL (2847), Gestation length QTL (10617), Drip loss QTL (8374), average daily gain QTL (2846), Backfat at rump QTL (21206), Loin muscle area QTL (38072), average daily gain QTL (16887), backfat above muscle dorsi QTL (5237), Fat-cuts percentage QTL (855), White blood cell counts QTL (15047), Drip loss QT…
263	1	259479001	259483500	Drip loss QTL (8300), average daily gain QTL (5680), average daily gain QTL (2847), Gestation length QTL (10617), average daily gain QTL (2846), Backfat at rump QTL (21206), Loin muscle area QTL (38072), average daily gain QTL (16887), backfat above muscle dorsi QTL (5237), Fat-cuts percentage QTL (855), White blood cell counts QTL (15047), Drip loss QTL (8131), average daily gain QTL (22269), ba…
264	1	259591501	259599500	Drip loss QTL (8300), average daily gain QTL (5680), average daily gain QTL (2847), Gestation length QTL (10617), average daily gain QTL (2846), Backfat at rump QTL (21206), Loin muscle area QTL (38072), average daily gain QTL (16887), backfat above muscle dorsi QTL (5237), Fat-cuts percentage QTL (855), White blood cell counts QTL (15047), Drip loss QTL (8131), average daily gain QTL (22269), ba…
265	1	273942501	273945500	Average backfat thickness QTL (35), Drip loss QTL (8300), Average backfat thickness QTL (3145), External fat on ham QTL (861), average daily gain QTL (5680), Average backfat thickness QTL (310), White blood cell counts QTL (5456), PH for Longissmus dorsi QTL (3169), Gestation length QTL (10617), Lean cuts percentage QTL (808), Backfat at rump QTL (21206), Vertebra number QTL (21301), Loin muscle …
266	1	277649501	277659000	Average backfat thickness QTL (35), Drip loss QTL (8300), Average backfat thickness QTL (3145), External fat on ham QTL (861), average daily gain QTL (5680), White blood cell counts QTL (5456), PH for Longissmus dorsi QTL (3169), Lean cuts percentage QTL (808), Backfat at rump QTL (21206), Vertebra number QTL (21301), Loin muscle area QTL (38072), backfat above muscle dorsi QTL (5237), Thoracic v…
267	1	285131501	285136500	Average backfat thickness QTL (35), Fat to meat ratio QTL (12739), Drip loss QTL (8300), Lean meat percentage QTL (824), Average backfat thickness QTL (3145), average daily gain QTL (5680), Fat-cuts percentage QTL (12727), PH for Longissmus dorsi QTL (3169), Backfat at rump QTL (21206), Vertebra number QTL (21301), Loin muscle area QTL (38072), backfat above muscle dorsi QTL (5237), Thoracic vert…
268	1	285236501	285240500	Average backfat thickness QTL (35), Fat to meat ratio QTL (12739), Drip loss QTL (8300), Lean meat percentage QTL (824), Average backfat thickness QTL (3145), average daily gain QTL (5680), Fat-cuts percentage QTL (12727), PH for Longissmus dorsi QTL (3169), Backfat at rump QTL (21206), Vertebra number QTL (21301), Loin muscle area QTL (38072), backfat above muscle dorsi QTL (5237), Thoracic vert…
269	1	285243001	285251000	Average backfat thickness QTL (35), Fat to meat ratio QTL (12739), Drip loss QTL (8300), Lean meat percentage QTL (824), Average backfat thickness QTL (3145), average daily gain QTL (5680), Fat-cuts percentage QTL (12727), PH for Longissmus dorsi QTL (3169), Backfat at rump QTL (21206), Vertebra number QTL (21301), Loin muscle area QTL (38072), backfat above muscle dorsi QTL (5237), Thoracic vert…
270	1	293950001	293956500	Average backfat thickness QTL (35), Fat to meat ratio QTL (12739), Drip loss QTL (8300), Lean meat percentage QTL (824), Average backfat thickness QTL (3145), Fat-cuts percentage QTL (12727), PH for Longissmus dorsi QTL (3169), Backfat weight QTL (3149), Ham weight QTL (3148), Drip loss QTL (8131), Drip loss QTL (8323), backfat at last rib QTL (16833), body weight (17 weeks) QTL (662), Drip loss …
271	1	294924501	294929000	Average backfat thickness QTL (35), Drip loss QTL (8300), Average backfat thickness QTL (3145), PH for Longissmus dorsi QTL (3169), Backfat weight QTL (3149), Ham weight QTL (3148), Drip loss QTL (8131), Drip loss QTL (8323), body weight (17 weeks) QTL (662), Leaf fat weight QTL (402), Drip loss QTL (8382), Drip loss QTL (8564), backfat at last rib QTL (27), Drip loss QTL (80), Lean meat percenta…
272	1	295291001	295298000	Average backfat thickness QTL (35), Drip loss QTL (8300), Average backfat thickness QTL (3145), PH for Longissmus dorsi QTL (3169), Backfat weight QTL (3149), Ham weight QTL (3148), Drip loss QTL (8131), Drip loss QTL (8323), body weight (17 weeks) QTL (662), Leaf fat weight QTL (402), Drip loss QTL (8382), Drip loss QTL (8564), backfat at last rib QTL (27), Drip loss QTL (80), Lean meat percenta…
273	1	296200501	296210500	Average backfat thickness QTL (35), Drip loss QTL (8300), Average backfat thickness QTL (3145), PH for Longissmus dorsi QTL (3169), Backfat weight QTL (3149), Ham weight QTL (3148), Drip loss QTL (8131), Drip loss QTL (8323), body weight (17 weeks) QTL (662), Leaf fat weight QTL (402), Drip loss QTL (8382), Drip loss QTL (8564), backfat at last rib QTL (27), Drip loss QTL (80), Lean meat percenta…
274	1	296195001	296287500	Average backfat thickness QTL (35), Drip loss QTL (8300), Average backfat thickness QTL (3145), PH for Longissmus dorsi QTL (3169), Backfat weight QTL (3149), Ham weight QTL (3148), Drip loss QTL (8131), Drip loss QTL (8323), body weight (17 weeks) QTL (662), Leaf fat weight QTL (402), Drip loss QTL (8382), Drip loss QTL (8564), backfat at last rib QTL (27), Drip loss QTL (80), Lean meat percenta…
275	1	296289501	296297500	Average backfat thickness QTL (35), Drip loss QTL (8300), Average backfat thickness QTL (3145), PH for Longissmus dorsi QTL (3169), Backfat weight QTL (3149), Ham weight QTL (3148), Drip loss QTL (8131), Drip loss QTL (8323), body weight (17 weeks) QTL (662), Leaf fat weight QTL (402), Drip loss QTL (8382), Drip loss QTL (8564), backfat at last rib QTL (27), Drip loss QTL (80), Lean meat percenta…
276	1	296294501	296314500	Average backfat thickness QTL (35), Drip loss QTL (8300), Average backfat thickness QTL (3145), PH for Longissmus dorsi QTL (3169), Backfat weight QTL (3149), Ham weight QTL (3148), Drip loss QTL (8131), Drip loss QTL (8323), body weight (17 weeks) QTL (662), Leaf fat weight QTL (402), Drip loss QTL (8382), Drip loss QTL (8564), backfat at last rib QTL (27), Drip loss QTL (80), Lean meat percenta…
277	1	296311501	296330000	Average backfat thickness QTL (35), Drip loss QTL (8300), Average backfat thickness QTL (3145), PH for Longissmus dorsi QTL (3169), Backfat weight QTL (3149), Ham weight QTL (3148), Drip loss QTL (8131), Drip loss QTL (8323), body weight (17 weeks) QTL (662), Leaf fat weight QTL (402), Drip loss QTL (8382), Drip loss QTL (8564), backfat at last rib QTL (27), Drip loss QTL (80), Lean meat percenta…
278	1	296540501	296543000	Average backfat thickness QTL (35), Drip loss QTL (8300), Average backfat thickness QTL (3145), PH for Longissmus dorsi QTL (3169), Backfat weight QTL (3149), Ham weight QTL (3148), Drip loss QTL (8131), Drip loss QTL (8323), body weight (17 weeks) QTL (662), Leaf fat weight QTL (402), Drip loss QTL (8382), Drip loss QTL (8564), backfat at last rib QTL (27), Drip loss QTL (80), Lean meat percenta…
279	1	296553001	296568500	Average backfat thickness QTL (35), Drip loss QTL (8300), Average backfat thickness QTL (3145), PH for Longissmus dorsi QTL (3169), Backfat weight QTL (3149), Ham weight QTL (3148), Drip loss QTL (8131), Drip loss QTL (8323), body weight (17 weeks) QTL (662), Leaf fat weight QTL (402), Drip loss QTL (8382), Drip loss QTL (8564), backfat at last rib QTL (27), Drip loss QTL (80), Lean meat percenta…
280	1	297104001	297115500	Average backfat thickness QTL (35), Drip loss QTL (8300), Average backfat thickness QTL (3145), PH for Longissmus dorsi QTL (3169), Backfat weight QTL (3149), Ham weight QTL (3148), Drip loss QTL (8131), Drip loss QTL (8323), body weight (17 weeks) QTL (662), Leaf fat weight QTL (402), Drip loss QTL (8382), Drip loss QTL (8564), backfat at last rib QTL (27), Drip loss QTL (80), Lean meat percenta…
281	1	302474001	302477000	Average backfat thickness QTL (35), Drip loss QTL (8300), Average backfat thickness QTL (3145), PH for Longissmus dorsi QTL (3169), Backfat weight QTL (3149), Loin and ham percentage in carcass QTL (377), Ham weight QTL (3148), Drip loss QTL (8131), Drip loss QTL (8323), body weight (17 weeks) QTL (662), Leaf fat weight QTL (402), Drip loss QTL (8382), Drip loss QTL (8564), backfat at last rib QT…
282	1	308049001	308068500	Drip loss QTL (8300), Fat weight (total) QTL (65021), Drip loss QTL (8131), Drip loss QTL (8323), Leaf fat weight QTL (402), Drip loss QTL (8382), Drip loss QTL (8564), Drip loss QTL (8063), Umbilical hernia QTL (8742), Drip loss QTL (8480), Drip loss QTL (7936), Percentage of backfat and leaf fat in carcass QTL (403), Ham weight QTL (376), Loin weight QTL (375), Drip loss QTL (8602)
283	1	312366501	312401500	Percentage of backfat and leaf fat in carcass QTL (403), Fat percentage in carcass QTL (65022)
284	1	314277001	314281000	Percentage of backfat and leaf fat in carcass QTL (403)
285	1	314289501	314305500	Percentage of backfat and leaf fat in carcass QTL (403)
286	1	479001	536000
287	1	575501	608500
288	1	631501	641000
289	1	2205501	2218000
290	1	2305501	2322000
291	1	2328001	2339500
292	1	2343501	2357000
293	1	2400501	2415000
294	1	2412001	2426000
295	1	2936501	2946000	Loin muscle area QTL (38072), Body weight (birth) QTL (826), Loin muscle area QTL (21352), Marbling QTL (38049), Loin muscle area QTL (3221), Muscle moisture percentage QTL (38073), Glucose level QTL (15087), Diameter of angular fibers QTL (2793), Teat number QTL (276), Loin fat percentage QTL (38050)
296	1	3075001	3082000	Loin muscle area QTL (38072), Body weight (birth) QTL (826), Loin muscle area QTL (21352), Marbling QTL (38049), Loin muscle area QTL (3221), Muscle moisture percentage QTL (38073), Glucose level QTL (15087), Intramuscular fat content QTL (29590), Diameter of angular fibers QTL (2793), Teat number QTL (276), Loin fat percentage QTL (38050)
297	1	8346501	8352500	Drip loss QTL (8081), average daily gain QTL (5680), Drip loss QTL (8628), indole, laboratory QTL (106214), Loin muscle area QTL (38072), Body weight (birth) QTL (826), Loin muscle area QTL (21352), Musculus gluteus weight QTL (1276), Non-return rate QTL (18535), Stearic acid content QTL (3111), Drip loss QTL (8295), Marbling QTL (38049), Shoulder subcutaneous fat thickness QTL (5671), Drip loss …
298	1	8533001	8536500	average daily gain QTL (5680), Loin muscle area QTL (38072), Body weight (birth) QTL (826), Loin muscle area QTL (21352), Musculus gluteus weight QTL (1276), Stearic acid content QTL (3111), Marbling QTL (38049), Shoulder subcutaneous fat thickness QTL (5671), Loin muscle area QTL (3221), Muscle moisture percentage QTL (38073), Stearic acid content QTL (3119), Glucose level QTL (15087), Diameter …
299	1	10197001	10200000	average daily gain QTL (5680), Loin muscle area QTL (38072), CIE-a* QTL (28043), Body weight (birth) QTL (826), Loin muscle area QTL (21352), Musculus gluteus weight QTL (1276), Stearic acid content QTL (3111), Marbling QTL (38049), Shoulder subcutaneous fat thickness QTL (5671), Loin muscle area QTL (3221), Muscle moisture percentage QTL (38073), Stearic acid content QTL (3119), Glucose level QT…
300	1	10975001	10998000	average daily gain QTL (5680), Loin muscle area QTL (38072), Salmonella count in liver QTL (11554), CIE-a* QTL (28043), Body weight (birth) QTL (826), Loin muscle area QTL (21352), Stearic acid content QTL (3111), Marbling QTL (38049), Shoulder subcutaneous fat thickness QTL (5671), Loin muscle area QTL (3221), Muscle moisture percentage QTL (38073), average daily gain QTL (319), Stearic acid con…
301	1	10996001	11010000	average daily gain QTL (5680), Loin muscle area QTL (38072), Salmonella count in liver QTL (11554), CIE-a* QTL (28043), Body weight (birth) QTL (826), Loin muscle area QTL (21352), Stearic acid content QTL (3111), Marbling QTL (38049), Shoulder subcutaneous fat thickness QTL (5671), Loin muscle area QTL (3221), Muscle moisture percentage QTL (38073), average daily gain QTL (319), Stearic acid con…
302	1	11020501	11034500	average daily gain QTL (5680), Loin muscle area QTL (38072), Salmonella count in liver QTL (11554), CIE-a* QTL (28043), Body weight (birth) QTL (826), Loin muscle area QTL (21352), Stearic acid content QTL (3111), Marbling QTL (38049), Shoulder subcutaneous fat thickness QTL (5671), Loin muscle area QTL (3221), Muscle moisture percentage QTL (38073), average daily gain QTL (319), Stearic acid con…
303	1	11026501	11031500	average daily gain QTL (5680), Loin muscle area QTL (38072), Salmonella count in liver QTL (11554), CIE-a* QTL (28043), Body weight (birth) QTL (826), Loin muscle area QTL (21352), Stearic acid content QTL (3111), Marbling QTL (38049), Shoulder subcutaneous fat thickness QTL (5671), Loin muscle area QTL (3221), Muscle moisture percentage QTL (38073), average daily gain QTL (319), Stearic acid con…
304	1	11029001	11036000	average daily gain QTL (5680), Loin muscle area QTL (38072), Salmonella count in liver QTL (11554), CIE-a* QTL (28043), Body weight (birth) QTL (826), Loin muscle area QTL (21352), Stearic acid content QTL (3111), Marbling QTL (38049), Shoulder subcutaneous fat thickness QTL (5671), Loin muscle area QTL (3221), Muscle moisture percentage QTL (38073), average daily gain QTL (319), Stearic acid con…
305	1	11120501	11222000	average daily gain QTL (5680), Loin muscle area QTL (38072), Salmonella count in liver QTL (11554), CIE-a* QTL (28043), Body weight (birth) QTL (826), Loin muscle area QTL (21352), Stearic acid content QTL (3111), Marbling QTL (38049), Shoulder subcutaneous fat thickness QTL (5671), Loin muscle area QTL (3221), Muscle moisture percentage QTL (38073), average daily gain QTL (319), Stearic acid con…
306	1	14259501	14263500	average daily gain QTL (5680), Drip loss QTL (8043), Loin muscle area QTL (38072), Salmonella count in liver QTL (11554), Body weight (birth) QTL (826), Loin muscle area QTL (21352), Stearic acid content QTL (3111), Drip loss QTL (8349), Marbling QTL (38049), Drip loss QTL (8012), Shoulder subcutaneous fat thickness QTL (5671), Loin muscle area QTL (3221), Muscle moisture percentage QTL (38073), …
307	1	15054001	15064500	average daily gain QTL (5680), Drip loss QTL (8043), Loin muscle area QTL (38072), Salmonella count in liver QTL (11554), Body weight (birth) QTL (826), Loin muscle area QTL (21352), Stearic acid content QTL (3111), Drip loss QTL (8349), Marbling QTL (38049), Drip loss QTL (8012), Shoulder subcutaneous fat thickness QTL (5671), Loin muscle area QTL (3221), Muscle moisture percentage QTL (38073), …
308	1	17588001	17590500	average daily gain QTL (5680), Drip loss QTL (8043), Loin muscle area QTL (38072), backfat above muscle dorsi QTL (5237), Ham weight QTL (95692), PH for Longissmus dorsi QTL (2787), Body weight QTL (66275), backfat at last rib QTL (5674), Drip loss QTL (8349), Estimated carcass lean content QTL (5678), Marbling QTL (38049), Leaf fat weight QTL (3863), Drip loss QTL (8012), Shoulder subcutaneous f…
309	1	33933001	33936500	average daily gain QTL (5680), Drip loss QTL (8043), muscle protein percentage QTL (3838), Loin muscle area QTL (46), Loin muscle area QTL (38072), Carcass weight (hot) QTL (16896), backfat above muscle dorsi QTL (5237), average daily gain QTL (338), White blood cell counts QTL (15047), PH for Longissmus dorsi QTL (2787), backfat at last rib QTL (5674), CIE-a* QTL (3980), Drip loss QTL (8349), Es…
310	1	33934001	33944000	average daily gain QTL (5680), Drip loss QTL (8043), muscle protein percentage QTL (3838), Loin muscle area QTL (46), Loin muscle area QTL (38072), Carcass weight (hot) QTL (16896), backfat above muscle dorsi QTL (5237), average daily gain QTL (338), White blood cell counts QTL (15047), PH for Longissmus dorsi QTL (2787), backfat at last rib QTL (5674), CIE-a* QTL (3980), Drip loss QTL (8349), Es…
311	1	44491001	44497000	Drip loss QTL (7828), average daily gain QTL (5680), Drip loss QTL (8043), Estimated carcass lean content QTL (5960), muscle protein percentage QTL (3838), CD2-positive leukocyte number QTL (4260), Drip loss QTL (8597), Loin and neck meat weight QTL (807), Loin muscle area QTL (46), Carcass weight (cold) QTL (792), Backfat at rump QTL (21206), Loin muscle area QTL (38072), Carcass weight (cold) Q…
312	1	45255501	45265000	Drip loss QTL (7828), average daily gain QTL (5680), Drip loss QTL (8043), Estimated carcass lean content QTL (5960), muscle protein percentage QTL (3838), CD2-positive leukocyte number QTL (4260), Drip loss QTL (8597), Loin and neck meat weight QTL (807), Loin muscle area QTL (46), Carcass weight (cold) QTL (792), Backfat at rump QTL (21206), Loin muscle area QTL (38072), Carcass weight (cold) Q…
313	1	54292001	54305500	average daily gain QTL (5680), Drip loss QTL (8043), Estimated carcass lean content QTL (5960), CD2-positive leukocyte number QTL (4260), Backfat at rump QTL (21206), Loin muscle area QTL (38072), backfat above muscle dorsi QTL (5237), Feed intake QTL (871), White blood cell counts QTL (15047), backfat at last rib QTL (5674), Marbling QTL (4019), Head weight QTL (860), Drip loss QTL (8349), Estim…
314	1	66932501	66943000	Drip loss QTL (7737), Drip loss QTL (7956), Liver weight QTL (13265), average daily gain QTL (5680), Drip loss QTL (8043), Potassium level QTL (6380), Estimated carcass lean content QTL (5960), CD2-positive leukocyte number QTL (4260), backfat at P2 position QTL (4107), average daily gain QTL (3673), Backfat at rump QTL (21206), Loin muscle area QTL (38072), backfat above muscle dorsi QTL (5237),…
315	1	67046501	67050000	Drip loss QTL (7737), Drip loss QTL (7956), Liver weight QTL (13265), average daily gain QTL (5680), Drip loss QTL (8043), Potassium level QTL (6380), Estimated carcass lean content QTL (5960), CD2-positive leukocyte number QTL (4260), backfat at P2 position QTL (4107), average daily gain QTL (3673), Backfat at rump QTL (21206), Loin muscle area QTL (38072), backfat above muscle dorsi QTL (5237),…
316	1	68718001	68731500	Liver weight QTL (13265), average daily gain QTL (5680), Drip loss QTL (8043), Potassium level QTL (6380), Estimated carcass lean content QTL (5960), CD2-positive leukocyte number QTL (4260), backfat at P2 position QTL (4107), average daily gain QTL (3673), Backfat at rump QTL (21206), Loin muscle area QTL (38072), backfat above muscle dorsi QTL (5237), Feed intake QTL (871), White blood cell cou…
317	1	69225501	69238000	Liver weight QTL (13265), average daily gain QTL (5680), Drip loss QTL (8043), Potassium level QTL (6380), Estimated carcass lean content QTL (5960), CD2-positive leukocyte number QTL (4260), backfat at P2 position QTL (4107), average daily gain QTL (3673), Backfat at rump QTL (21206), Loin muscle area QTL (38072), backfat above muscle dorsi QTL (5237), Feed intake QTL (871), White blood cell cou…
318	1	69262001	69285500	Liver weight QTL (13265), average daily gain QTL (5680), Drip loss QTL (8043), Potassium level QTL (6380), Estimated carcass lean content QTL (5960), CD2-positive leukocyte number QTL (4260), backfat at P2 position QTL (4107), average daily gain QTL (3673), Backfat at rump QTL (21206), Loin muscle area QTL (38072), backfat above muscle dorsi QTL (5237), Feed intake QTL (871), White blood cell cou…
319	1	88943501	88948000	average daily gain QTL (5680), Drip loss QTL (8043), Potassium level QTL (6380), Estimated carcass lean content QTL (5960), CD2-positive leukocyte number QTL (4260), backfat at P2 position QTL (4107), average daily gain QTL (3673), Backfat at rump QTL (21206), Loin muscle area QTL (38072), backfat above muscle dorsi QTL (5237), Ear weight QTL (8853), Feed intake QTL (871), White blood cell counts…
320	1	89113001	89117000	average daily gain QTL (5680), Drip loss QTL (8043), Potassium level QTL (6380), Estimated carcass lean content QTL (5960), CD2-positive leukocyte number QTL (4260), backfat at P2 position QTL (4107), average daily gain QTL (3673), Backfat at rump QTL (21206), Loin muscle area QTL (38072), backfat above muscle dorsi QTL (5237), Ear weight QTL (8853), Feed intake QTL (871), White blood cell counts…
321	1	90722001	90732500	Drip loss QTL (8146), average daily gain QTL (5680), Drip loss QTL (8043), Potassium level QTL (6380), Estimated carcass lean content QTL (5960), CD2-positive leukocyte number QTL (4260), backfat at P2 position QTL (4107), average daily gain QTL (3673), Backfat at rump QTL (21206), Loin muscle area QTL (38072), backfat above muscle dorsi QTL (5237), Ear weight QTL (8853), Feed intake QTL (871), W…
322	1	163455501	163470000	Daily feed intake QTL (141), Drip loss QTL (8300), average daily gain QTL (5680), Potassium level QTL (6380), CD2-positive leukocyte number QTL (4260), Side fat thickness QTL (5958), pH for Semimembranosus QTL (5665), Backfat at tenth rib QTL (138), Backfat at rump QTL (21206), Platelet distribution width QTL (12312), Loin muscle area QTL (38072), backfat above muscle dorsi QTL (5237), Backfat we…
323	1	169446501	169450500	Daily feed intake QTL (141), Drip loss QTL (8300), Backfat weight QTL (12724), average daily gain QTL (5680), Potassium level QTL (6380), CD2-positive leukocyte number QTL (4260), Side fat thickness QTL (5958), pH for Semimembranosus QTL (5665), Head weight QTL (432), Backfat at tenth rib QTL (138), Backfat at rump QTL (21206), Platelet distribution width QTL (12312), Loin muscle area QTL (38072)…
324	1	169606001	169611500	Daily feed intake QTL (141), Drip loss QTL (8300), Backfat weight QTL (12724), average daily gain QTL (5680), Potassium level QTL (6380), CD2-positive leukocyte number QTL (4260), Side fat thickness QTL (5958), pH for Semimembranosus QTL (5665), Head weight QTL (432), Backfat at tenth rib QTL (138), Backfat at rump QTL (21206), Platelet distribution width QTL (12312), Loin muscle area QTL (38072)…
325	1	210944001	210952500	Daily feed intake QTL (141), Drip loss QTL (8300), Backfat weight QTL (12724), average daily gain QTL (5680), Potassium level QTL (6380), CD2-positive leukocyte number QTL (4260), Head weight QTL (432), Backfat at tenth rib QTL (138), Backfat at rump QTL (21206), Platelet distribution width QTL (12312), Loin muscle area QTL (38072), backfat above muscle dorsi QTL (5237), Backfat weight QTL (3171)…
326	1	213630001	213637000	Daily feed intake QTL (141), Drip loss QTL (8300), Backfat weight QTL (12724), average daily gain QTL (5680), Potassium level QTL (6380), CD2-positive leukocyte number QTL (4260), Head weight QTL (432), Backfat at tenth rib QTL (138), Backfat at rump QTL (21206), Platelet distribution width QTL (12312), Loin muscle area QTL (38072), backfat above muscle dorsi QTL (5237), Backfat weight QTL (3171)…
327	1	213711501	213716500	Daily feed intake QTL (141), Drip loss QTL (8300), Backfat weight QTL (12724), average daily gain QTL (5680), Potassium level QTL (6380), CD2-positive leukocyte number QTL (4260), Head weight QTL (432), Backfat at tenth rib QTL (138), Backfat at rump QTL (21206), Platelet distribution width QTL (12312), Loin muscle area QTL (38072), backfat above muscle dorsi QTL (5237), Backfat weight QTL (3171)…
328	1	215279001	215285000	Daily feed intake QTL (141), Drip loss QTL (8300), Backfat weight QTL (12724), average daily gain QTL (5680), Potassium level QTL (6380), CD2-positive leukocyte number QTL (4260), Head weight QTL (432), Backfat at tenth rib QTL (138), Backfat at rump QTL (21206), Platelet distribution width QTL (12312), Loin muscle area QTL (38072), backfat above muscle dorsi QTL (5237), Backfat weight QTL (3171)…
329	1	226905001	226911000	External fat on ham QTL (839), Daily feed intake QTL (141), Drip loss QTL (8300), Ratio of glycolytic muscles weight to ham meat and bone weight QTL (1277), Backfat weight QTL (12724), average daily gain QTL (5680), Lean cuts percentage QTL (806), average daily gain QTL (2847), CD2-positive leukocyte number QTL (4260), Gestation length QTL (10617), average daily gain QTL (2846), Head weight QTL (…
330	1	231346501	231351500	External fat on ham QTL (839), Daily feed intake QTL (141), Drip loss QTL (8300), Backfat weight QTL (12724), average daily gain QTL (5680), Lean cuts percentage QTL (806), average daily gain QTL (2847), Gestation length QTL (10617), average daily gain QTL (2846), Head weight QTL (432), Backfat at tenth rib QTL (138), Backfat at rump QTL (21206), Platelet distribution width QTL (12312), Loin musc…
331	1	239187501	239196000	Drip loss QTL (8300), average daily gain QTL (5680), average daily gain QTL (2847), Hind feet conformation QTL (8912), Gestation length QTL (10617), average daily gain QTL (2846), Backfat at rump QTL (21206), Platelet distribution width QTL (12312), Loin muscle area QTL (38072), average daily gain QTL (16887), backfat above muscle dorsi QTL (5237), Fat-cuts percentage QTL (855), Locomotion QTL (4…
332	1	275239001	275244500	Average backfat thickness QTL (35), Drip loss QTL (8300), Average backfat thickness QTL (3145), External fat on ham QTL (861), average daily gain QTL (5680), Average backfat thickness QTL (310), White blood cell counts QTL (5456), PH for Longissmus dorsi QTL (3169), Lean cuts percentage QTL (808), Drip loss QTL (7748), Backfat at rump QTL (21206), Vertebra number QTL (21301), Loin muscle area QTL…
333	1	285211001	285219500	Average backfat thickness QTL (35), Fat to meat ratio QTL (12739), Drip loss QTL (8300), Lean meat percentage QTL (824), Average backfat thickness QTL (3145), average daily gain QTL (5680), Fat-cuts percentage QTL (12727), PH for Longissmus dorsi QTL (3169), Backfat at rump QTL (21206), Vertebra number QTL (21301), Loin muscle area QTL (38072), backfat above muscle dorsi QTL (5237), Thoracic vert…
334	1	285394001	285407000	Average backfat thickness QTL (35), Fat to meat ratio QTL (12739), Drip loss QTL (8300), Lean meat percentage QTL (824), Average backfat thickness QTL (3145), average daily gain QTL (5680), Fat-cuts percentage QTL (12727), PH for Longissmus dorsi QTL (3169), Backfat at rump QTL (21206), Vertebra number QTL (21301), Loin muscle area QTL (38072), backfat above muscle dorsi QTL (5237), Thoracic vert…
335	1	285415501	285421000	Average backfat thickness QTL (35), Fat to meat ratio QTL (12739), Drip loss QTL (8300), Lean meat percentage QTL (824), Average backfat thickness QTL (3145), average daily gain QTL (5680), Fat-cuts percentage QTL (12727), PH for Longissmus dorsi QTL (3169), Backfat at rump QTL (21206), Vertebra number QTL (21301), Loin muscle area QTL (38072), backfat above muscle dorsi QTL (5237), Thoracic vert…
336	1	293917001	293922500	Average backfat thickness QTL (35), Fat to meat ratio QTL (12739), Drip loss QTL (8300), Lean meat percentage QTL (824), Average backfat thickness QTL (3145), Fat-cuts percentage QTL (12727), PH for Longissmus dorsi QTL (3169), Backfat weight QTL (3149), Ham weight QTL (3148), Drip loss QTL (8131), Drip loss QTL (8323), backfat at last rib QTL (16833), body weight (17 weeks) QTL (662), Drip loss …
337	1	294877001	294883000	Average backfat thickness QTL (35), Drip loss QTL (8300), Average backfat thickness QTL (3145), PH for Longissmus dorsi QTL (3169), Backfat weight QTL (3149), Ham weight QTL (3148), Drip loss QTL (8131), Drip loss QTL (8323), body weight (17 weeks) QTL (662), Leaf fat weight QTL (402), Drip loss QTL (8382), Drip loss QTL (8564), backfat at last rib QTL (27), Drip loss QTL (80), Lean meat percenta…
338	1	295826001	295830500	Average backfat thickness QTL (35), Drip loss QTL (8300), Average backfat thickness QTL (3145), PH for Longissmus dorsi QTL (3169), Backfat weight QTL (3149), Ham weight QTL (3148), Drip loss QTL (8131), Drip loss QTL (8323), body weight (17 weeks) QTL (662), Leaf fat weight QTL (402), Drip loss QTL (8382), Drip loss QTL (8564), backfat at last rib QTL (27), Drip loss QTL (80), Lean meat percenta…
339	1	295928001	295934000	Average backfat thickness QTL (35), Drip loss QTL (8300), Average backfat thickness QTL (3145), PH for Longissmus dorsi QTL (3169), Backfat weight QTL (3149), Ham weight QTL (3148), Drip loss QTL (8131), Drip loss QTL (8323), body weight (17 weeks) QTL (662), Leaf fat weight QTL (402), Drip loss QTL (8382), Drip loss QTL (8564), backfat at last rib QTL (27), Drip loss QTL (80), Lean meat percenta…
340	1	296394001	296402000	Average backfat thickness QTL (35), Drip loss QTL (8300), Average backfat thickness QTL (3145), PH for Longissmus dorsi QTL (3169), Backfat weight QTL (3149), Ham weight QTL (3148), Drip loss QTL (8131), Drip loss QTL (8323), body weight (17 weeks) QTL (662), Leaf fat weight QTL (402), Drip loss QTL (8382), Drip loss QTL (8564), backfat at last rib QTL (27), Drip loss QTL (80), Lean meat percenta…
341	1	296429501	296436000	Average backfat thickness QTL (35), Drip loss QTL (8300), Average backfat thickness QTL (3145), PH for Longissmus dorsi QTL (3169), Backfat weight QTL (3149), Ham weight QTL (3148), Drip loss QTL (8131), Drip loss QTL (8323), body weight (17 weeks) QTL (662), Leaf fat weight QTL (402), Drip loss QTL (8382), Drip loss QTL (8564), backfat at last rib QTL (27), Drip loss QTL (80), Lean meat percenta…
342	1	296437001	296441500	Average backfat thickness QTL (35), Drip loss QTL (8300), Average backfat thickness QTL (3145), PH for Longissmus dorsi QTL (3169), Backfat weight QTL (3149), Ham weight QTL (3148), Drip loss QTL (8131), Drip loss QTL (8323), body weight (17 weeks) QTL (662), Leaf fat weight QTL (402), Drip loss QTL (8382), Drip loss QTL (8564), backfat at last rib QTL (27), Drip loss QTL (80), Lean meat percenta…
343	1	298028001	298033000	Average backfat thickness QTL (35), Drip loss QTL (8300), Average backfat thickness QTL (3145), PH for Longissmus dorsi QTL (3169), Backfat weight QTL (3149), Ham weight QTL (3148), Drip loss QTL (8131), Drip loss QTL (8323), body weight (17 weeks) QTL (662), Drip loss QTL (8238), Drip loss QTL (7747), Leaf fat weight QTL (402), Drip loss QTL (8382), Drip loss QTL (8564), Drip loss QTL (7900), ba…
344	1	300520001	300523500	Average backfat thickness QTL (35), Drip loss QTL (8300), Average backfat thickness QTL (3145), PH for Longissmus dorsi QTL (3169), Backfat weight QTL (3149), Loin and ham percentage in carcass QTL (377), Ham weight QTL (3148), Drip loss QTL (8131), Drip loss QTL (8323), body weight (17 weeks) QTL (662), Leaf fat weight QTL (402), Drip loss QTL (8382), Drip loss QTL (8564), backfat at last rib QT…
345	1	314242001	314267000	Percentage of backfat and leaf fat in carcass QTL (403)
346	1	314284501	314291500	Percentage of backfat and leaf fat in carcass QTL (403)
347	1	314302001	314310000	Percentage of backfat and leaf fat in carcass QTL (403)
348	1	314307501	314315500	Percentage of backfat and leaf fat in carcass QTL (403)
349	1	314419001	314429000	Percentage of backfat and leaf fat in carcass QTL (403)
350	1	314473501	314481000	Percentage of backfat and leaf fat in carcass QTL (403)
351	1	314628001	314634500	Percentage of backfat and leaf fat in carcass QTL (403)
352	1	314947001	314955000	Percentage of backfat and leaf fat in carcass QTL (403)
353	1	315020001	315027500	Percentage of backfat and leaf fat in carcass QTL (403)
354	1	8972001	8978500	average daily gain QTL (5680), Loin muscle area QTL (38072), CIE-a* QTL (28043), Body weight (birth) QTL (826), Loin muscle area QTL (21352), Musculus gluteus weight QTL (1276), Stearic acid content QTL (3111), Marbling QTL (38049), Shoulder subcutaneous fat thickness QTL (5671), Loin muscle area QTL (3221), Muscle moisture percentage QTL (38073), Stearic acid content QTL (3119), Glucose level QT…
355	1	8990501	8993500	average daily gain QTL (5680), Loin muscle area QTL (38072), CIE-a* QTL (28043), Body weight (birth) QTL (826), Loin muscle area QTL (21352), Musculus gluteus weight QTL (1276), Stearic acid content QTL (3111), Marbling QTL (38049), Shoulder subcutaneous fat thickness QTL (5671), Loin muscle area QTL (3221), Muscle moisture percentage QTL (38073), Stearic acid content QTL (3119), Glucose level QT…
356	1	22631001	22634000	average daily gain QTL (5680), Drip loss QTL (8043), muscle protein percentage QTL (3838), Loin muscle area QTL (38072), backfat above muscle dorsi QTL (5237), average daily gain QTL (338), White blood cell counts QTL (15047), PH for Longissmus dorsi QTL (2787), backfat at last rib QTL (5674), CIE-a* QTL (3980), Drip loss QTL (8349), Estimated carcass lean content QTL (5678), Marbling QTL (38049)…
357	1	22769001	22772000	average daily gain QTL (5680), Drip loss QTL (8043), muscle protein percentage QTL (3838), Loin muscle area QTL (38072), backfat above muscle dorsi QTL (5237), average daily gain QTL (338), White blood cell counts QTL (15047), PH for Longissmus dorsi QTL (2787), backfat at last rib QTL (5674), CIE-a* QTL (3980), Drip loss QTL (8349), Estimated carcass lean content QTL (5678), Marbling QTL (38049)…
358	1	66464001	66467000	Drip loss QTL (7737), Drip loss QTL (7956), average daily gain QTL (5680), Drip loss QTL (8043), Potassium level QTL (6380), Estimated carcass lean content QTL (5960), CD2-positive leukocyte number QTL (4260), backfat at P2 position QTL (4107), average daily gain QTL (3673), Backfat at rump QTL (21206), Loin muscle area QTL (38072), backfat above muscle dorsi QTL (5237), Drip loss QTL (8201), Fee…
359	1	68727501	68731500	Liver weight QTL (13265), average daily gain QTL (5680), Drip loss QTL (8043), Potassium level QTL (6380), Estimated carcass lean content QTL (5960), CD2-positive leukocyte number QTL (4260), backfat at P2 position QTL (4107), average daily gain QTL (3673), Backfat at rump QTL (21206), Loin muscle area QTL (38072), backfat above muscle dorsi QTL (5237), Feed intake QTL (871), White blood cell cou…
360	1	85534501	85538000	Drip loss QTL (7874), average daily gain QTL (5680), Drip loss QTL (8043), Potassium level QTL (6380), Estimated carcass lean content QTL (5960), CD2-positive leukocyte number QTL (4260), backfat at P2 position QTL (4107), average daily gain QTL (3673), Backfat at rump QTL (21206), Loin muscle area QTL (38072), backfat above muscle dorsi QTL (5237), Linoleic acid content QTL (32100), Feed intake …
361	1	87863501	87868000	average daily gain QTL (5680), Drip loss QTL (8043), Potassium level QTL (6380), Estimated carcass lean content QTL (5960), CD2-positive leukocyte number QTL (4260), backfat at P2 position QTL (4107), average daily gain QTL (3673), Backfat at rump QTL (21206), Loin muscle area QTL (38072), backfat above muscle dorsi QTL (5237), Ear weight QTL (8853), Feed intake QTL (871), White blood cell counts…
362	1	133764001	133768500	Drip loss QTL (8300), average daily gain QTL (5680), Potassium level QTL (6380), Fat percentage in carcass QTL (65014), CD2-positive leukocyte number QTL (4260), pH for Semimembranosus QTL (5665), CIE-L* QTL (4326), Backfat at rump QTL (21206), Platelet distribution width QTL (12312), Loin muscle area QTL (38072), backfat above muscle dorsi QTL (5237), Ear weight QTL (8853), Backfat weight QTL (3…
363	1	163081501	163086500	Daily feed intake QTL (141), Drip loss QTL (8300), average daily gain QTL (5680), Potassium level QTL (6380), CD2-positive leukocyte number QTL (4260), Side fat thickness QTL (5958), pH for Semimembranosus QTL (5665), Backfat at tenth rib QTL (138), Backfat at rump QTL (21206), Platelet distribution width QTL (12312), Loin muscle area QTL (38072), backfat above muscle dorsi QTL (5237), Backfat we…
364	1	167744501	167749000	Daily feed intake QTL (141), Drip loss QTL (8300), average daily gain QTL (5680), Potassium level QTL (6380), CD2-positive leukocyte number QTL (4260), Side fat thickness QTL (5958), pH for Semimembranosus QTL (5665), Head weight QTL (432), Backfat at tenth rib QTL (138), Backfat at rump QTL (21206), Platelet distribution width QTL (12312), Loin muscle area QTL (38072), backfat above muscle dorsi…
365	1	213646501	213654000	Daily feed intake QTL (141), Drip loss QTL (8300), Backfat weight QTL (12724), average daily gain QTL (5680), Potassium level QTL (6380), CD2-positive leukocyte number QTL (4260), Head weight QTL (432), Backfat at tenth rib QTL (138), Backfat at rump QTL (21206), Platelet distribution width QTL (12312), Loin muscle area QTL (38072), backfat above muscle dorsi QTL (5237), Backfat weight QTL (3171)…
366	1	213751501	213758000	Daily feed intake QTL (141), Drip loss QTL (8300), Backfat weight QTL (12724), average daily gain QTL (5680), Potassium level QTL (6380), CD2-positive leukocyte number QTL (4260), Head weight QTL (432), Backfat at tenth rib QTL (138), Backfat at rump QTL (21206), Platelet distribution width QTL (12312), Loin muscle area QTL (38072), backfat above muscle dorsi QTL (5237), Backfat weight QTL (3171)…
367	1	213765501	213772500	Daily feed intake QTL (141), Drip loss QTL (8300), Backfat weight QTL (12724), average daily gain QTL (5680), Potassium level QTL (6380), CD2-positive leukocyte number QTL (4260), Head weight QTL (432), Backfat at tenth rib QTL (138), Backfat at rump QTL (21206), Platelet distribution width QTL (12312), Loin muscle area QTL (38072), backfat above muscle dorsi QTL (5237), Backfat weight QTL (3171)…
368	1	213787501	213791000	Daily feed intake QTL (141), Drip loss QTL (8300), Backfat weight QTL (12724), average daily gain QTL (5680), Potassium level QTL (6380), CD2-positive leukocyte number QTL (4260), Head weight QTL (432), Backfat at tenth rib QTL (138), Backfat at rump QTL (21206), Platelet distribution width QTL (12312), Loin muscle area QTL (38072), backfat above muscle dorsi QTL (5237), Backfat weight QTL (3171)…
369	1	215342001	215348500	Daily feed intake QTL (141), Drip loss QTL (8300), Backfat weight QTL (12724), average daily gain QTL (5680), Potassium level QTL (6380), CD2-positive leukocyte number QTL (4260), Head weight QTL (432), Backfat at tenth rib QTL (138), Backfat at rump QTL (21206), Platelet distribution width QTL (12312), Loin muscle area QTL (38072), backfat above muscle dorsi QTL (5237), Backfat weight QTL (3171)…
370	1	216335501	216341500	Daily feed intake QTL (141), Drip loss QTL (8300), Backfat weight QTL (12724), average daily gain QTL (5680), Potassium level QTL (6380), CD2-positive leukocyte number QTL (4260), Head weight QTL (432), Backfat at tenth rib QTL (138), Backfat at rump QTL (21206), Platelet distribution width QTL (12312), Loin muscle area QTL (38072), backfat above muscle dorsi QTL (5237), Backfat weight QTL (3171)…
371	1	221477501	221481500	Daily feed intake QTL (141), Drip loss QTL (8300), Ratio of glycolytic muscles weight to ham meat and bone weight QTL (1277), Backfat weight QTL (12724), average daily gain QTL (5680), average daily gain QTL (2847), Potassium level QTL (6380), CD2-positive leukocyte number QTL (4260), average daily gain QTL (2846), Head weight QTL (432), Backfat at tenth rib QTL (138), Backfat at rump QTL (21206)…
372	1	273779001	273785500	Average backfat thickness QTL (35), Drip loss QTL (8300), Average backfat thickness QTL (3145), External fat on ham QTL (861), average daily gain QTL (5680), Average backfat thickness QTL (310), White blood cell counts QTL (5456), PH for Longissmus dorsi QTL (3169), Gestation length QTL (10617), Lean cuts percentage QTL (808), Backfat at rump QTL (21206), Vertebra number QTL (21301), Loin muscle …
373	1	283646501	283649000	Average backfat thickness QTL (35), Left teat number QTL (6463), Fat to meat ratio QTL (12739), Drip loss QTL (8300), Lean meat percentage QTL (824), Average backfat thickness QTL (3145), average daily gain QTL (5680), Fat-cuts percentage QTL (12727), PH for Longissmus dorsi QTL (3169), Backfat at rump QTL (21206), Vertebra number QTL (21301), Loin muscle area QTL (38072), backfat above muscle do…
374	1	285136501	285146000	Average backfat thickness QTL (35), Fat to meat ratio QTL (12739), Drip loss QTL (8300), Lean meat percentage QTL (824), Average backfat thickness QTL (3145), average daily gain QTL (5680), Fat-cuts percentage QTL (12727), PH for Longissmus dorsi QTL (3169), Backfat at rump QTL (21206), Vertebra number QTL (21301), Loin muscle area QTL (38072), backfat above muscle dorsi QTL (5237), Thoracic vert…
375	1	285931001	285939000	Average backfat thickness QTL (35), Fat to meat ratio QTL (12739), Drip loss QTL (8300), Lean meat percentage QTL (824), Average backfat thickness QTL (3145), average daily gain QTL (5680), Fat-cuts percentage QTL (12727), PH for Longissmus dorsi QTL (3169), Backfat at rump QTL (21206), Vertebra number QTL (21301), Loin muscle area QTL (38072), backfat above muscle dorsi QTL (5237), Thoracic vert…
376	1	294853501	294861500	Average backfat thickness QTL (35), Drip loss QTL (8300), Average backfat thickness QTL (3145), PH for Longissmus dorsi QTL (3169), Backfat weight QTL (3149), Ham weight QTL (3148), Drip loss QTL (8131), Drip loss QTL (8323), body weight (17 weeks) QTL (662), Leaf fat weight QTL (402), Drip loss QTL (8382), Drip loss QTL (8564), backfat at last rib QTL (27), Drip loss QTL (80), Lean meat percenta…
377	1	294929001	294933000	Average backfat thickness QTL (35), Drip loss QTL (8300), Average backfat thickness QTL (3145), PH for Longissmus dorsi QTL (3169), Backfat weight QTL (3149), Ham weight QTL (3148), Drip loss QTL (8131), Drip loss QTL (8323), body weight (17 weeks) QTL (662), Leaf fat weight QTL (402), Drip loss QTL (8382), Drip loss QTL (8564), backfat at last rib QTL (27), Drip loss QTL (80), Lean meat percenta…
378	1	296192501	296205000	Average backfat thickness QTL (35), Drip loss QTL (8300), Average backfat thickness QTL (3145), PH for Longissmus dorsi QTL (3169), Backfat weight QTL (3149), Ham weight QTL (3148), Drip loss QTL (8131), Drip loss QTL (8323), body weight (17 weeks) QTL (662), Leaf fat weight QTL (402), Drip loss QTL (8382), Drip loss QTL (8564), backfat at last rib QTL (27), Drip loss QTL (80), Lean meat percenta…
379	1	300521501	300530000	Average backfat thickness QTL (35), Drip loss QTL (8300), Average backfat thickness QTL (3145), PH for Longissmus dorsi QTL (3169), Backfat weight QTL (3149), Loin and ham percentage in carcass QTL (377), Ham weight QTL (3148), Drip loss QTL (8131), Drip loss QTL (8323), body weight (17 weeks) QTL (662), Leaf fat weight QTL (402), Drip loss QTL (8382), Drip loss QTL (8564), backfat at last rib QT…
380	1	300689501	300694500	Average backfat thickness QTL (35), Drip loss QTL (8300), Average backfat thickness QTL (3145), PH for Longissmus dorsi QTL (3169), Backfat weight QTL (3149), Loin and ham percentage in carcass QTL (377), Ham weight QTL (3148), Drip loss QTL (8131), Drip loss QTL (8323), body weight (17 weeks) QTL (662), Leaf fat weight QTL (402), Drip loss QTL (8382), Drip loss QTL (8564), backfat at last rib QT…
381	1	314656001	314660500	Percentage of backfat and leaf fat in carcass QTL (403)
382	1	307001	319500
383	1	324001	338500
384	1	342001	349000
385	1	351501	411500
386	1	465001	482500
387	1	551001	557000
388	1	614501	630500
389	1	639501	646500
390	1	648501	652000
391	1	652001	657000
392	1	716501	721500
393	1	726001	764500
394	1	2180001	2201000
395	1	2424501	2429000
396	1	2558001	2585500
397	1	2853001	2871000	Loin muscle area QTL (38072), Body weight (birth) QTL (826), Loin muscle area QTL (21352), Marbling QTL (38049), Loin muscle area QTL (3221), Muscle moisture percentage QTL (38073), Glucose level QTL (15087), Diameter of angular fibers QTL (2793), Teat number QTL (276), Loin fat percentage QTL (38050)
398	1	2947001	2953500	Loin muscle area QTL (38072), Body weight (birth) QTL (826), Loin muscle area QTL (21352), Marbling QTL (38049), Loin muscle area QTL (3221), Muscle moisture percentage QTL (38073), Glucose level QTL (15087), Diameter of angular fibers QTL (2793), Teat number QTL (276), Loin fat percentage QTL (38050)
399	1	48405001	48408000	average daily gain QTL (5680), Drip loss QTL (8043), Estimated carcass lean content QTL (5960), muscle protein percentage QTL (3838), CD2-positive leukocyte number QTL (4260), Loin and neck meat weight QTL (807), Loin muscle area QTL (46), Carcass weight (cold) QTL (792), Backfat at rump QTL (21206), Loin muscle area QTL (38072), Carcass weight (cold) QTL (12710), Carcass weight (hot) QTL (16896)…
400	1	48409501	48416500	average daily gain QTL (5680), Drip loss QTL (8043), Estimated carcass lean content QTL (5960), muscle protein percentage QTL (3838), CD2-positive leukocyte number QTL (4260), Loin and neck meat weight QTL (807), Loin muscle area QTL (46), Carcass weight (cold) QTL (792), Backfat at rump QTL (21206), Loin muscle area QTL (38072), Carcass weight (cold) QTL (12710), Carcass weight (hot) QTL (16896)…
401	1	54456001	54461000	average daily gain QTL (5680), Drip loss QTL (8043), Estimated carcass lean content QTL (5960), CD2-positive leukocyte number QTL (4260), Backfat at rump QTL (21206), Loin muscle area QTL (38072), backfat above muscle dorsi QTL (5237), Feed intake QTL (871), White blood cell counts QTL (15047), backfat at last rib QTL (5674), Marbling QTL (4019), Head weight QTL (860), Drip loss QTL (8349), Estim…
402	1	67850001	67863500	Liver weight QTL (13265), average daily gain QTL (5680), Drip loss QTL (8043), Potassium level QTL (6380), Estimated carcass lean content QTL (5960), CD2-positive leukocyte number QTL (4260), backfat at P2 position QTL (4107), average daily gain QTL (3673), Backfat at rump QTL (21206), Loin muscle area QTL (38072), backfat above muscle dorsi QTL (5237), Feed intake QTL (871), White blood cell cou…
403	1	67973001	67977500	Liver weight QTL (13265), average daily gain QTL (5680), Drip loss QTL (8043), Potassium level QTL (6380), Estimated carcass lean content QTL (5960), CD2-positive leukocyte number QTL (4260), backfat at P2 position QTL (4107), average daily gain QTL (3673), Backfat at rump QTL (21206), Loin muscle area QTL (38072), backfat above muscle dorsi QTL (5237), Feed intake QTL (871), White blood cell cou…
404	1	69371501	69417500	Liver weight QTL (13265), average daily gain QTL (5680), Drip loss QTL (8043), Potassium level QTL (6380), Estimated carcass lean content QTL (5960), CD2-positive leukocyte number QTL (4260), backfat at P2 position QTL (4107), average daily gain QTL (3673), Backfat at rump QTL (21206), Loin muscle area QTL (38072), backfat above muscle dorsi QTL (5237), Feed intake QTL (871), White blood cell cou…
405	1	78434501	78439500	Liver weight QTL (13265), average daily gain QTL (5680), Drip loss QTL (8043), Potassium level QTL (6380), Estimated carcass lean content QTL (5960), CD2-positive leukocyte number QTL (4260), backfat at P2 position QTL (4107), average daily gain QTL (3673), Backfat at rump QTL (21206), Loin muscle area QTL (38072), backfat above muscle dorsi QTL (5237), Feed intake QTL (871), White blood cell cou…
406	1	87810001	87821000	average daily gain QTL (5680), Drip loss QTL (8043), Potassium level QTL (6380), Estimated carcass lean content QTL (5960), CD2-positive leukocyte number QTL (4260), backfat at P2 position QTL (4107), average daily gain QTL (3673), Backfat at rump QTL (21206), Loin muscle area QTL (38072), backfat above muscle dorsi QTL (5237), Ear weight QTL (8853), Feed intake QTL (871), White blood cell counts…
407	1	104789501	104792000	average daily gain QTL (5680), Drip loss QTL (8043), Potassium level QTL (6380), Estimated carcass lean content QTL (5960), CD2-positive leukocyte number QTL (4260), backfat at P2 position QTL (4107), Linoleic acid content QTL (32101), CIE-L* QTL (4326), average daily gain QTL (3673), Backfat at rump QTL (21206), Loin muscle area QTL (38072), backfat above muscle dorsi QTL (5237), Ear weight QTL …
408	1	105133501	105138000	average daily gain QTL (5680), Drip loss QTL (8043), Potassium level QTL (6380), CD2-positive leukocyte number QTL (4260), backfat at P2 position QTL (4107), Linoleic acid content QTL (32101), pH for Semimembranosus QTL (5665), CIE-L* QTL (4326), average daily gain QTL (3673), Backfat at rump QTL (21206), Loin muscle area QTL (38072), backfat above muscle dorsi QTL (5237), Ear weight QTL (8853), …
409	1	105141501	105159500	average daily gain QTL (5680), Drip loss QTL (8043), Potassium level QTL (6380), CD2-positive leukocyte number QTL (4260), backfat at P2 position QTL (4107), Linoleic acid content QTL (32101), pH for Semimembranosus QTL (5665), CIE-L* QTL (4326), average daily gain QTL (3673), Backfat at rump QTL (21206), Loin muscle area QTL (38072), backfat above muscle dorsi QTL (5237), Ear weight QTL (8853), …
410	1	114075001	114080000	Drip loss QTL (8300), average daily gain QTL (5680), Drip loss QTL (8043), Potassium level QTL (6380), CD2-positive leukocyte number QTL (4260), backfat at P2 position QTL (4107), pH for Semimembranosus QTL (5665), CIE-L* QTL (4326), average daily gain QTL (3673), Backfat at rump QTL (21206), Loin muscle area QTL (38072), backfat above muscle dorsi QTL (5237), Ear weight QTL (8853), Backfat weigh…
411	1	114308501	114310500	Drip loss QTL (8300), average daily gain QTL (5680), Drip loss QTL (8043), Potassium level QTL (6380), CD2-positive leukocyte number QTL (4260), backfat at P2 position QTL (4107), pH for Semimembranosus QTL (5665), CIE-L* QTL (4326), average daily gain QTL (3673), Backfat at rump QTL (21206), Loin muscle area QTL (38072), backfat above muscle dorsi QTL (5237), Ear weight QTL (8853), Backfat weigh…
412	1	172034501	172038500	Daily feed intake QTL (141), Drip loss QTL (8300), Backfat weight QTL (12724), average daily gain QTL (5680), Potassium level QTL (6380), CD2-positive leukocyte number QTL (4260), Side fat thickness QTL (5958), pH for Semimembranosus QTL (5665), Head weight QTL (432), Backfat at tenth rib QTL (138), Backfat at rump QTL (21206), average daily gain QTL (22259), Platelet distribution width QTL (1231…
413	1	174097001	174104000	Daily feed intake QTL (141), Drip loss QTL (8132), Drip loss QTL (8300), Backfat weight QTL (12724), average daily gain QTL (5680), Potassium level QTL (6380), CD2-positive leukocyte number QTL (4260), Side fat thickness QTL (5958), pH for Semimembranosus QTL (5665), Head weight QTL (432), Backfat at tenth rib QTL (138), Backfat at rump QTL (21206), Platelet distribution width QTL (12312), Loin m…
414	1	174112001	174119000	Daily feed intake QTL (141), Drip loss QTL (8132), Drip loss QTL (8300), Backfat weight QTL (12724), average daily gain QTL (5680), Potassium level QTL (6380), CD2-positive leukocyte number QTL (4260), Side fat thickness QTL (5958), pH for Semimembranosus QTL (5665), Head weight QTL (432), Backfat at tenth rib QTL (138), Backfat at rump QTL (21206), Platelet distribution width QTL (12312), Loin m…
415	1	174204001	174209000	Daily feed intake QTL (141), Drip loss QTL (8132), Drip loss QTL (8300), Backfat weight QTL (12724), average daily gain QTL (5680), Potassium level QTL (6380), CD2-positive leukocyte number QTL (4260), Side fat thickness QTL (5958), pH for Semimembranosus QTL (5665), Head weight QTL (432), Backfat at tenth rib QTL (138), Backfat at rump QTL (21206), Platelet distribution width QTL (12312), Loin m…
416	1	181833001	181837500	Daily feed intake QTL (141), Drip loss QTL (8300), Average backfat thickness QTL (4016), Backfat weight QTL (12724), average daily gain QTL (5680), Potassium level QTL (6380), Backfat at last lumbar QTL (4015), CD2-positive leukocyte number QTL (4260), Side fat thickness QTL (5958), pH for Semimembranosus QTL (5665), Head weight QTL (432), Backfat at tenth rib QTL (138), Backfat at rump QTL (2120…
417	1	183566001	183568500	Daily feed intake QTL (141), Drip loss QTL (8300), Average backfat thickness QTL (4016), Backfat weight QTL (12724), average daily gain QTL (5680), Potassium level QTL (6380), Backfat at last lumbar QTL (4015), Litter size QTL (106223), CD2-positive leukocyte number QTL (4260), Side fat thickness QTL (5958), pH for Semimembranosus QTL (5665), Head weight QTL (432), Backfat at tenth rib QTL (138),…
418	1	193797501	193801500	Daily feed intake QTL (141), Drip loss QTL (8300), Average backfat thickness QTL (4016), Backfat weight QTL (12724), average daily gain QTL (5680), Potassium level QTL (6380), CD2-positive leukocyte number QTL (4260), Side fat thickness QTL (5958), pH for Semimembranosus QTL (5665), Head weight QTL (432), Backfat at tenth rib QTL (138), Backfat at rump QTL (21206), Platelet distribution width QTL…
419	1	194035501	194042500	Daily feed intake QTL (141), Drip loss QTL (8300), Average backfat thickness QTL (4016), Backfat weight QTL (12724), average daily gain QTL (5680), Potassium level QTL (6380), CD2-positive leukocyte number QTL (4260), Side fat thickness QTL (5958), pH for Semimembranosus QTL (5665), Head weight QTL (432), Backfat at tenth rib QTL (138), Backfat at rump QTL (21206), Platelet distribution width QTL…
420	1	210965001	210971500	Daily feed intake QTL (141), Drip loss QTL (8300), Backfat weight QTL (12724), average daily gain QTL (5680), Potassium level QTL (6380), CD2-positive leukocyte number QTL (4260), Head weight QTL (432), Backfat at tenth rib QTL (138), Backfat at rump QTL (21206), Platelet distribution width QTL (12312), Loin muscle area QTL (38072), backfat above muscle dorsi QTL (5237), Backfat weight QTL (3171)…
421	1	211548001	211551500	Daily feed intake QTL (141), Drip loss QTL (8300), Backfat weight QTL (12724), average daily gain QTL (5680), Potassium level QTL (6380), CD2-positive leukocyte number QTL (4260), Head weight QTL (432), Backfat at tenth rib QTL (138), Backfat at rump QTL (21206), Platelet distribution width QTL (12312), Loin muscle area QTL (38072), backfat above muscle dorsi QTL (5237), Backfat weight QTL (3171)…
422	1	215127001	215130000	Daily feed intake QTL (141), Drip loss QTL (8300), Backfat weight QTL (12724), average daily gain QTL (5680), Potassium level QTL (6380), CD2-positive leukocyte number QTL (4260), Head weight QTL (432), Backfat at tenth rib QTL (138), Backfat at rump QTL (21206), Platelet distribution width QTL (12312), Loin muscle area QTL (38072), backfat above muscle dorsi QTL (5237), Backfat weight QTL (3171)…
423	1	260817001	260821500	Drip loss QTL (8300), average daily gain QTL (5680), average daily gain QTL (2847), Gestation length QTL (10617), average daily gain QTL (2846), Backfat at rump QTL (21206), Loin muscle area QTL (38072), average daily gain QTL (16887), backfat above muscle dorsi QTL (5237), Fat-cuts percentage QTL (855), White blood cell counts QTL (15047), Drip loss QTL (8131), average daily gain QTL (22269), ba…
424	1	270504501	270507000	Drip loss QTL (8300), External fat on ham QTL (861), average daily gain QTL (5680), average daily gain QTL (2847), Average backfat thickness QTL (310), White blood cell counts QTL (5456), Gestation length QTL (10617), Lean cuts percentage QTL (808), average daily gain QTL (2846), Backfat at rump QTL (21206), Vertebra number QTL (21301), Loin muscle area QTL (38072), backfat above muscle dorsi QTL…
425	1	274209001	274220000	Average backfat thickness QTL (35), Drip loss QTL (8300), Average backfat thickness QTL (3145), External fat on ham QTL (861), average daily gain QTL (5680), Average backfat thickness QTL (310), White blood cell counts QTL (5456), PH for Longissmus dorsi QTL (3169), Lean cuts percentage QTL (808), Backfat at rump QTL (21206), Vertebra number QTL (21301), Loin muscle area QTL (38072), backfat abov…
426	1	285248001	285251500	Average backfat thickness QTL (35), Fat to meat ratio QTL (12739), Drip loss QTL (8300), Lean meat percentage QTL (824), Average backfat thickness QTL (3145), average daily gain QTL (5680), Fat-cuts percentage QTL (12727), PH for Longissmus dorsi QTL (3169), Backfat at rump QTL (21206), Vertebra number QTL (21301), Loin muscle area QTL (38072), backfat above muscle dorsi QTL (5237), Thoracic vert…
427	1	302544501	302547500	Average backfat thickness QTL (35), Drip loss QTL (8300), Average backfat thickness QTL (3145), PH for Longissmus dorsi QTL (3169), Backfat weight QTL (3149), Loin and ham percentage in carcass QTL (377), Ham weight QTL (3148), Drip loss QTL (8131), Drip loss QTL (8323), body weight (17 weeks) QTL (662), Leaf fat weight QTL (402), Drip loss QTL (8382), Drip loss QTL (8564), backfat at last rib QT…
428	1	308098001	308114500	Drip loss QTL (8300), Fat weight (total) QTL (65021), Drip loss QTL (8131), Drip loss QTL (8323), Leaf fat weight QTL (402), Drip loss QTL (8382), Drip loss QTL (8564), Drip loss QTL (8063), Umbilical hernia QTL (8742), Drip loss QTL (8480), Drip loss QTL (7936), Percentage of backfat and leaf fat in carcass QTL (403), Ham weight QTL (376), Loin weight QTL (375), Drip loss QTL (8602)
429	1	308546501	308553000	Drip loss QTL (8300), Drip loss QTL (8131), Drip loss QTL (8323), Leaf fat weight QTL (402), Drip loss QTL (8382), Drip loss QTL (8564), Drip loss QTL (8063), Umbilical hernia QTL (8742), Drip loss QTL (8480), Drip loss QTL (7936), Percentage of backfat and leaf fat in carcass QTL (403), Ham weight QTL (376), Loin weight QTL (375), Drip loss QTL (8602)
430	1	2320501	2326000
431	1	2379001	2387000
432	1	2418001	2425000
433	1	4266001	4272000	Loin muscle area QTL (38072), Body weight (birth) QTL (826), Loin muscle area QTL (21352), Marbling QTL (38049), Loin muscle area QTL (3221), Muscle moisture percentage QTL (38073), Glucose level QTL (15087), Diameter of angular fibers QTL (2793), Teat number QTL (276), Loin fat percentage QTL (38050)
434	1	4282001	4292000	Loin muscle area QTL (38072), Body weight (birth) QTL (826), Loin muscle area QTL (21352), Marbling QTL (38049), Loin muscle area QTL (3221), Muscle moisture percentage QTL (38073), Glucose level QTL (15087), Diameter of angular fibers QTL (2793), Teat number QTL (276), Loin fat percentage QTL (38050)
435	1	4545001	4551500	Loin muscle area QTL (38072), Body weight (birth) QTL (826), Loin muscle area QTL (21352), Marbling QTL (38049), Loin muscle area QTL (3221), Muscle moisture percentage QTL (38073), Glucose level QTL (15087), Diameter of angular fibers QTL (2793), Teat number QTL (276), Loin fat percentage QTL (38050)
436	1	4702501	4708000	Loin muscle area QTL (38072), Body weight (birth) QTL (826), Loin muscle area QTL (21352), Marbling QTL (38049), Loin muscle area QTL (3221), Muscle moisture percentage QTL (38073), Glucose level QTL (15087), Diameter of angular fibers QTL (2793), Teat number QTL (276), Loin fat percentage QTL (38050)
437	1	61945001	61950500	average daily gain QTL (5680), Drip loss QTL (8043), Estimated carcass lean content QTL (5960), CD2-positive leukocyte number QTL (4260), Backfat at rump QTL (21206), Loin muscle area QTL (38072), backfat above muscle dorsi QTL (5237), Feed intake QTL (871), White blood cell counts QTL (15047), Scapula length QTL (6499), backfat at last rib QTL (5674), Marbling QTL (4019), Head weight QTL (860), …
438	1	61949001	61954000	average daily gain QTL (5680), Drip loss QTL (8043), Estimated carcass lean content QTL (5960), CD2-positive leukocyte number QTL (4260), Backfat at rump QTL (21206), Loin muscle area QTL (38072), backfat above muscle dorsi QTL (5237), Feed intake QTL (871), White blood cell counts QTL (15047), Scapula length QTL (6499), backfat at last rib QTL (5674), Marbling QTL (4019), Head weight QTL (860), …
439	1	62129001	62136000	average daily gain QTL (5680), Drip loss QTL (8043), Estimated carcass lean content QTL (5960), CD2-positive leukocyte number QTL (4260), Backfat at rump QTL (21206), Loin muscle area QTL (38072), backfat above muscle dorsi QTL (5237), Feed intake QTL (871), White blood cell counts QTL (15047), Scapula length QTL (6499), backfat at last rib QTL (5674), Marbling QTL (4019), Head weight QTL (860), …
440	1	71984501	71992000	Liver weight QTL (13265), average daily gain QTL (5680), Drip loss QTL (8043), Potassium level QTL (6380), Estimated carcass lean content QTL (5960), CD2-positive leukocyte number QTL (4260), backfat at P2 position QTL (4107), average daily gain QTL (3673), Backfat at rump QTL (21206), Loin muscle area QTL (38072), backfat above muscle dorsi QTL (5237), Feed intake QTL (871), White blood cell cou…
441	1	78275001	78280500	Liver weight QTL (13265), average daily gain QTL (5680), Drip loss QTL (8043), Potassium level QTL (6380), Estimated carcass lean content QTL (5960), Drip loss QTL (8248), CD2-positive leukocyte number QTL (4260), backfat at P2 position QTL (4107), average daily gain QTL (3673), Backfat at rump QTL (21206), Loin muscle area QTL (38072), backfat above muscle dorsi QTL (5237), Feed intake QTL (871)…
442	1	78562501	78569500	average daily gain QTL (5680), Drip loss QTL (8043), Potassium level QTL (6380), Estimated carcass lean content QTL (5960), CD2-positive leukocyte number QTL (4260), backfat at P2 position QTL (4107), average daily gain QTL (3673), Backfat at rump QTL (21206), Loin muscle area QTL (38072), backfat above muscle dorsi QTL (5237), Feed intake QTL (871), White blood cell counts QTL (15047), backfat a…
443	1	140022001	140024500	Drip loss QTL (8300), average daily gain QTL (5680), Potassium level QTL (6380), CD2-positive leukocyte number QTL (4260), pH for Semimembranosus QTL (5665), CIE-L* QTL (4326), Backfat at rump QTL (21206), Platelet distribution width QTL (12312), Loin muscle area QTL (38072), backfat above muscle dorsi QTL (5237), Ear weight QTL (8853), Backfat weight QTL (3171), Feed intake QTL (871), White bloo…
444	1	180316001	180320500	Daily feed intake QTL (141), Drip loss QTL (8300), Average backfat thickness QTL (4016), Backfat weight QTL (12724), average daily gain QTL (5680), Potassium level QTL (6380), Backfat at last lumbar QTL (4015), CD2-positive leukocyte number QTL (4260), Side fat thickness QTL (5958), pH for Semimembranosus QTL (5665), Head weight QTL (432), Backfat at tenth rib QTL (138), Backfat at rump QTL (2120…
445	1	210984001	210989000	Daily feed intake QTL (141), Drip loss QTL (8300), Backfat weight QTL (12724), average daily gain QTL (5680), Potassium level QTL (6380), CD2-positive leukocyte number QTL (4260), Head weight QTL (432), Backfat at tenth rib QTL (138), Backfat at rump QTL (21206), Platelet distribution width QTL (12312), Loin muscle area QTL (38072), backfat above muscle dorsi QTL (5237), Backfat weight QTL (3171)…
446	1	248458501	248466000	Drip loss QTL (8300), average daily gain QTL (5680), average daily gain QTL (2847), Hind feet conformation QTL (8912), Gestation length QTL (10617), average daily gain QTL (2846), Backfat at rump QTL (21206), Loin muscle area QTL (38072), average daily gain QTL (16887), backfat above muscle dorsi QTL (5237), Fat-cuts percentage QTL (855), Locomotion QTL (478), White blood cell counts QTL (15047),…
447	1	251603001	251607000	Drip loss QTL (8300), average daily gain QTL (5680), average daily gain QTL (2847), Hind feet conformation QTL (8912), Gestation length QTL (10617), average daily gain QTL (2846), Backfat at rump QTL (21206), Loin muscle area QTL (38072), average daily gain QTL (16887), backfat above muscle dorsi QTL (5237), Fat-cuts percentage QTL (855), Locomotion QTL (478), White blood cell counts QTL (15047),…
448	1	259584001	259589500	Drip loss QTL (8300), average daily gain QTL (5680), average daily gain QTL (2847), Gestation length QTL (10617), average daily gain QTL (2846), Backfat at rump QTL (21206), Loin muscle area QTL (38072), average daily gain QTL (16887), backfat above muscle dorsi QTL (5237), Fat-cuts percentage QTL (855), White blood cell counts QTL (15047), Drip loss QTL (8131), average daily gain QTL (22269), ba…
449	1	259644001	259649500	Drip loss QTL (8300), average daily gain QTL (5680), average daily gain QTL (2847), Gestation length QTL (10617), average daily gain QTL (2846), Backfat at rump QTL (21206), Loin muscle area QTL (38072), average daily gain QTL (16887), backfat above muscle dorsi QTL (5237), Fat-cuts percentage QTL (855), White blood cell counts QTL (15047), Drip loss QTL (8131), average daily gain QTL (22269), ba…
450	1	260824001	260829000	Drip loss QTL (8300), average daily gain QTL (5680), average daily gain QTL (2847), Gestation length QTL (10617), average daily gain QTL (2846), Backfat at rump QTL (21206), Loin muscle area QTL (38072), average daily gain QTL (16887), backfat above muscle dorsi QTL (5237), Fat-cuts percentage QTL (855), White blood cell counts QTL (15047), Drip loss QTL (8131), average daily gain QTL (22269), ba…
451	1	261053501	261061000	Drip loss QTL (8300), average daily gain QTL (5680), average daily gain QTL (2847), Gestation length QTL (10617), average daily gain QTL (2846), Backfat at rump QTL (21206), Loin muscle area QTL (38072), average daily gain QTL (16887), backfat above muscle dorsi QTL (5237), Fat-cuts percentage QTL (855), White blood cell counts QTL (15047), Drip loss QTL (8131), average daily gain QTL (22269), ba…
452	1	277862001	277866500	Average backfat thickness QTL (35), Drip loss QTL (8300), Average backfat thickness QTL (3145), External fat on ham QTL (861), average daily gain QTL (5680), White blood cell counts QTL (5456), PH for Longissmus dorsi QTL (3169), Lean cuts percentage QTL (808), Backfat at rump QTL (21206), Vertebra number QTL (21301), Loin muscle area QTL (38072), backfat above muscle dorsi QTL (5237), Thoracic v…
453	1	285203501	285209000	Average backfat thickness QTL (35), Fat to meat ratio QTL (12739), Drip loss QTL (8300), Lean meat percentage QTL (824), Average backfat thickness QTL (3145), average daily gain QTL (5680), Fat-cuts percentage QTL (12727), PH for Longissmus dorsi QTL (3169), Backfat at rump QTL (21206), Vertebra number QTL (21301), Loin muscle area QTL (38072), backfat above muscle dorsi QTL (5237), Thoracic vert…
454	1	313751001	313757000	Percentage of backfat and leaf fat in carcass QTL (403)
455	1	314541001	314547000	Percentage of backfat and leaf fat in carcass QTL (403)
456	1	484001	493000
457	1	574501	579000
458	1	840001	845500
459	1	7992001	7995000	average daily gain QTL (5680), Loin muscle area QTL (38072), Body weight (birth) QTL (826), Loin muscle area QTL (21352), Musculus gluteus weight QTL (1276), Stearic acid content QTL (3111), Marbling QTL (38049), Drip loss QTL (7867), Shoulder subcutaneous fat thickness QTL (5671), Loin muscle area QTL (3221), Muscle moisture percentage QTL (38073), Stearic acid content QTL (3119), Glucose level …
460	1	8633501	8638000	average daily gain QTL (5680), Loin muscle area QTL (38072), Body weight (birth) QTL (826), Loin muscle area QTL (21352), Musculus gluteus weight QTL (1276), Stearic acid content QTL (3111), Marbling QTL (38049), Shoulder subcutaneous fat thickness QTL (5671), Loin muscle area QTL (3221), Muscle moisture percentage QTL (38073), Stearic acid content QTL (3119), Glucose level QTL (15087), Diameter …
461	1	14474501	14480000	average daily gain QTL (5680), Drip loss QTL (8043), Loin muscle area QTL (38072), Salmonella count in liver QTL (11554), Body weight (birth) QTL (826), Loin muscle area QTL (21352), Stearic acid content QTL (3111), Drip loss QTL (8349), Marbling QTL (38049), Drip loss QTL (8012), Shoulder subcutaneous fat thickness QTL (5671), Loin muscle area QTL (3221), Muscle moisture percentage QTL (38073), …
462	1	22492501	22500500	average daily gain QTL (5680), Drip loss QTL (8043), Loin muscle area QTL (38072), backfat above muscle dorsi QTL (5237), average daily gain QTL (338), White blood cell counts QTL (15047), PH for Longissmus dorsi QTL (2787), backfat at last rib QTL (5674), CIE-a* QTL (3980), Drip loss QTL (8349), Estimated carcass lean content QTL (5678), Marbling QTL (38049), Leaf fat weight QTL (3863), Drip los…
463	1	32241501	32248000	average daily gain QTL (5680), Drip loss QTL (8043), muscle protein percentage QTL (3838), Loin muscle area QTL (46), Loin muscle area QTL (38072), Carcass weight (hot) QTL (16896), backfat above muscle dorsi QTL (5237), average daily gain QTL (338), White blood cell counts QTL (15047), PH for Longissmus dorsi QTL (2787), backfat at last rib QTL (5674), CIE-a* QTL (3980), Drip loss QTL (8349), Es…
464	1	32870501	32873500	average daily gain QTL (5680), Drip loss QTL (8043), muscle protein percentage QTL (3838), Loin muscle area QTL (46), Loin muscle area QTL (38072), Carcass weight (hot) QTL (16896), backfat above muscle dorsi QTL (5237), average daily gain QTL (338), White blood cell counts QTL (15047), PH for Longissmus dorsi QTL (2787), backfat at last rib QTL (5674), CIE-a* QTL (3980), Drip loss QTL (8349), Es…
465	1	54287501	54294500	average daily gain QTL (5680), Drip loss QTL (8043), Estimated carcass lean content QTL (5960), CD2-positive leukocyte number QTL (4260), Backfat at rump QTL (21206), Loin muscle area QTL (38072), backfat above muscle dorsi QTL (5237), Feed intake QTL (871), White blood cell counts QTL (15047), backfat at last rib QTL (5674), Marbling QTL (4019), Head weight QTL (860), Drip loss QTL (8349), Estim…
466	1	54465001	54470000	average daily gain QTL (5680), Drip loss QTL (8043), Estimated carcass lean content QTL (5960), CD2-positive leukocyte number QTL (4260), Backfat at rump QTL (21206), Loin muscle area QTL (38072), backfat above muscle dorsi QTL (5237), Feed intake QTL (871), White blood cell counts QTL (15047), backfat at last rib QTL (5674), Marbling QTL (4019), Head weight QTL (860), Drip loss QTL (8349), Estim…
467	1	54469501	54494000	average daily gain QTL (5680), Drip loss QTL (8043), Estimated carcass lean content QTL (5960), CD2-positive leukocyte number QTL (4260), Backfat at rump QTL (21206), Loin muscle area QTL (38072), backfat above muscle dorsi QTL (5237), Feed intake QTL (871), White blood cell counts QTL (15047), backfat at last rib QTL (5674), Marbling QTL (4019), Head weight QTL (860), Drip loss QTL (8349), Estim…
468	1	54498001	54503500	average daily gain QTL (5680), Drip loss QTL (8043), Estimated carcass lean content QTL (5960), CD2-positive leukocyte number QTL (4260), Backfat at rump QTL (21206), Loin muscle area QTL (38072), backfat above muscle dorsi QTL (5237), Feed intake QTL (871), White blood cell counts QTL (15047), backfat at last rib QTL (5674), Marbling QTL (4019), Head weight QTL (860), Drip loss QTL (8349), Estim…
469	1	60747001	60750000	average daily gain QTL (5680), Drip loss QTL (8043), Estimated carcass lean content QTL (5960), CD2-positive leukocyte number QTL (4260), Backfat at rump QTL (21206), Loin muscle area QTL (38072), backfat above muscle dorsi QTL (5237), Feed intake QTL (871), White blood cell counts QTL (15047), backfat at last rib QTL (5674), Marbling QTL (4019), Head weight QTL (860), Drip loss QTL (8349), Estim…
470	1	63929001	63935500	average daily gain QTL (5680), Drip loss QTL (8043), Potassium level QTL (6380), Estimated carcass lean content QTL (5960), CD2-positive leukocyte number QTL (4260), backfat at P2 position QTL (4107), average daily gain QTL (3673), Backfat at rump QTL (21206), Loin muscle area QTL (38072), backfat above muscle dorsi QTL (5237), Feed intake QTL (871), White blood cell counts QTL (15047), Carcass w…
471	1	69346001	69357000	Liver weight QTL (13265), average daily gain QTL (5680), Drip loss QTL (8043), Potassium level QTL (6380), Estimated carcass lean content QTL (5960), CD2-positive leukocyte number QTL (4260), backfat at P2 position QTL (4107), average daily gain QTL (3673), Backfat at rump QTL (21206), Loin muscle area QTL (38072), backfat above muscle dorsi QTL (5237), Feed intake QTL (871), White blood cell cou…
472	1	77408001	77412500	Liver weight QTL (13265), average daily gain QTL (5680), Drip loss QTL (8043), Potassium level QTL (6380), Estimated carcass lean content QTL (5960), Drip loss QTL (8248), CD2-positive leukocyte number QTL (4260), backfat at P2 position QTL (4107), average daily gain QTL (3673), Backfat at rump QTL (21206), Loin muscle area QTL (38072), backfat above muscle dorsi QTL (5237), Feed intake QTL (871)…
473	1	89202001	89208000	average daily gain QTL (5680), Drip loss QTL (8043), Potassium level QTL (6380), Estimated carcass lean content QTL (5960), CD2-positive leukocyte number QTL (4260), backfat at P2 position QTL (4107), average daily gain QTL (3673), Backfat at rump QTL (21206), Loin muscle area QTL (38072), backfat above muscle dorsi QTL (5237), Ear weight QTL (8853), Feed intake QTL (871), White blood cell counts…
474	1	163470001	163478000	Daily feed intake QTL (141), Drip loss QTL (8300), average daily gain QTL (5680), Potassium level QTL (6380), CD2-positive leukocyte number QTL (4260), Side fat thickness QTL (5958), pH for Semimembranosus QTL (5665), Backfat at tenth rib QTL (138), Backfat at rump QTL (21206), Platelet distribution width QTL (12312), Loin muscle area QTL (38072), backfat above muscle dorsi QTL (5237), Backfat we…
475	1	204042001	204045000	Daily feed intake QTL (141), Drip loss QTL (8300), Backfat weight QTL (12724), average daily gain QTL (5680), Potassium level QTL (6380), CD2-positive leukocyte number QTL (4260), Side fat thickness QTL (5958), pH for Semimembranosus QTL (5665), Head weight QTL (432), Backfat at tenth rib QTL (138), Backfat at rump QTL (21206), Platelet distribution width QTL (12312), Loin muscle area QTL (38072)…
476	1	210954001	210959500	Daily feed intake QTL (141), Drip loss QTL (8300), Backfat weight QTL (12724), average daily gain QTL (5680), Potassium level QTL (6380), CD2-positive leukocyte number QTL (4260), Head weight QTL (432), Backfat at tenth rib QTL (138), Backfat at rump QTL (21206), Platelet distribution width QTL (12312), Loin muscle area QTL (38072), backfat above muscle dorsi QTL (5237), Backfat weight QTL (3171)…
477	1	231646501	231654500	External fat on ham QTL (839), Daily feed intake QTL (141), Drip loss QTL (8300), Backfat weight QTL (12724), average daily gain QTL (5680), Lean cuts percentage QTL (806), average daily gain QTL (2847), Gestation length QTL (10617), average daily gain QTL (2846), Head weight QTL (432), Drip loss QTL (8421), Backfat at tenth rib QTL (138), Backfat at rump QTL (21206), Platelet distribution width …
478	1	245031001	245035000	Drip loss QTL (8300), average daily gain QTL (5680), average daily gain QTL (2847), Hind feet conformation QTL (8912), Gestation length QTL (10617), average daily gain QTL (2846), Backfat at rump QTL (21206), Loin muscle area QTL (38072), average daily gain QTL (16887), backfat above muscle dorsi QTL (5237), Fat-cuts percentage QTL (855), Locomotion QTL (478), White blood cell counts QTL (15047),…
479	1	277914001	277926500	Average backfat thickness QTL (35), Drip loss QTL (8300), Average backfat thickness QTL (3145), External fat on ham QTL (861), average daily gain QTL (5680), White blood cell counts QTL (5456), PH for Longissmus dorsi QTL (3169), Lean cuts percentage QTL (808), Backfat at rump QTL (21206), Vertebra number QTL (21301), Loin muscle area QTL (38072), backfat above muscle dorsi QTL (5237), Thoracic v…
480	1	277955501	277969500	Average backfat thickness QTL (35), Drip loss QTL (8300), Average backfat thickness QTL (3145), External fat on ham QTL (861), average daily gain QTL (5680), White blood cell counts QTL (5456), PH for Longissmus dorsi QTL (3169), Lean cuts percentage QTL (808), Backfat at rump QTL (21206), Vertebra number QTL (21301), Loin muscle area QTL (38072), backfat above muscle dorsi QTL (5237), Thoracic v…
481	1	286141001	286150000	Average backfat thickness QTL (35), Fat to meat ratio QTL (12739), Drip loss QTL (8300), Lean meat percentage QTL (824), Average backfat thickness QTL (3145), average daily gain QTL (5680), Fat-cuts percentage QTL (12727), PH for Longissmus dorsi QTL (3169), Backfat at rump QTL (21206), Vertebra number QTL (21301), Loin muscle area QTL (38072), backfat above muscle dorsi QTL (5237), Thoracic vert…
482	1	286205001	286211000	Average backfat thickness QTL (35), Fat to meat ratio QTL (12739), Drip loss QTL (8300), Lean meat percentage QTL (824), Average backfat thickness QTL (3145), average daily gain QTL (5680), Fat-cuts percentage QTL (12727), PH for Longissmus dorsi QTL (3169), Backfat at rump QTL (21206), Vertebra number QTL (21301), Loin muscle area QTL (38072), backfat above muscle dorsi QTL (5237), Thoracic vert…
483	1	292578001	292582500	Average backfat thickness QTL (35), Fat to meat ratio QTL (12739), Drip loss QTL (8300), Lean meat percentage QTL (824), backfat at last rib QTL (3666), Average backfat thickness QTL (3145), average daily gain QTL (5680), Fat-cuts percentage QTL (12727), PH for Longissmus dorsi QTL (3169), Loin muscle area QTL (38072), backfat above muscle dorsi QTL (5237), average daily gain QTL (448), Backfat w…
484	1	313084501	313106000	Percentage of backfat and leaf fat in carcass QTL (403)
485	1	314659501	314669500	Percentage of backfat and leaf fat in carcass QTL (403)
486	1	314904501	314911000	Percentage of backfat and leaf fat in carcass QTL (403)
487	1	315061501	315067000	Percentage of backfat and leaf fat in carcass QTL (403)
488	1	22777501	22783500	average daily gain QTL (5680), Drip loss QTL (8043), muscle protein percentage QTL (3838), Loin muscle area QTL (38072), backfat above muscle dorsi QTL (5237), average daily gain QTL (338), White blood cell counts QTL (15047), PH for Longissmus dorsi QTL (2787), backfat at last rib QTL (5674), CIE-a* QTL (3980), Drip loss QTL (8349), Estimated carcass lean content QTL (5678), Marbling QTL (38049)…
489	1	78332501	78341000	Liver weight QTL (13265), average daily gain QTL (5680), Drip loss QTL (8043), Potassium level QTL (6380), Estimated carcass lean content QTL (5960), Drip loss QTL (8248), CD2-positive leukocyte number QTL (4260), backfat at P2 position QTL (4107), average daily gain QTL (3673), Backfat at rump QTL (21206), Loin muscle area QTL (38072), backfat above muscle dorsi QTL (5237), Feed intake QTL (871)…
490	1	105049001	105066000	average daily gain QTL (5680), Drip loss QTL (8043), Potassium level QTL (6380), Estimated carcass lean content QTL (5960), CD2-positive leukocyte number QTL (4260), backfat at P2 position QTL (4107), Linoleic acid content QTL (32101), CIE-L* QTL (4326), average daily gain QTL (3673), Backfat at rump QTL (21206), Loin muscle area QTL (38072), backfat above muscle dorsi QTL (5237), Ear weight QTL …
491	1	167822501	167827000	Daily feed intake QTL (141), Drip loss QTL (8300), average daily gain QTL (5680), Potassium level QTL (6380), CD2-positive leukocyte number QTL (4260), Side fat thickness QTL (5958), pH for Semimembranosus QTL (5665), Head weight QTL (432), Backfat at tenth rib QTL (138), Backfat at rump QTL (21206), Platelet distribution width QTL (12312), Loin muscle area QTL (38072), backfat above muscle dorsi…
492	1	216204001	216207000	Daily feed intake QTL (141), Drip loss QTL (8300), Backfat weight QTL (12724), average daily gain QTL (5680), Potassium level QTL (6380), CD2-positive leukocyte number QTL (4260), Head weight QTL (432), Backfat at tenth rib QTL (138), Backfat at rump QTL (21206), Platelet distribution width QTL (12312), Loin muscle area QTL (38072), backfat above muscle dorsi QTL (5237), Backfat weight QTL (3171)…
493	1	260793501	260803500	Drip loss QTL (8300), average daily gain QTL (5680), average daily gain QTL (2847), Gestation length QTL (10617), average daily gain QTL (2846), Backfat at rump QTL (21206), Loin muscle area QTL (38072), average daily gain QTL (16887), backfat above muscle dorsi QTL (5237), Fat-cuts percentage QTL (855), White blood cell counts QTL (15047), Drip loss QTL (8131), average daily gain QTL (22269), ba…
494	1	277575001	277581000	Average backfat thickness QTL (35), Drip loss QTL (8300), Average backfat thickness QTL (3145), External fat on ham QTL (861), average daily gain QTL (5680), White blood cell counts QTL (5456), PH for Longissmus dorsi QTL (3169), Lean cuts percentage QTL (808), Backfat at rump QTL (21206), Vertebra number QTL (21301), Loin muscle area QTL (38072), backfat above muscle dorsi QTL (5237), Thoracic v…
495	1	285360501	285377000	Average backfat thickness QTL (35), Fat to meat ratio QTL (12739), Drip loss QTL (8300), Lean meat percentage QTL (824), Average backfat thickness QTL (3145), Drip loss QTL (7913), average daily gain QTL (5680), Fat-cuts percentage QTL (12727), PH for Longissmus dorsi QTL (3169), Backfat at rump QTL (21206), Vertebra number QTL (21301), Loin muscle area QTL (38072), backfat above muscle dorsi QTL…
496	1	285866501	285874000	Average backfat thickness QTL (35), Fat to meat ratio QTL (12739), Drip loss QTL (8300), Lean meat percentage QTL (824), Average backfat thickness QTL (3145), average daily gain QTL (5680), Fat-cuts percentage QTL (12727), PH for Longissmus dorsi QTL (3169), Backfat at rump QTL (21206), Vertebra number QTL (21301), Loin muscle area QTL (38072), backfat above muscle dorsi QTL (5237), Thoracic vert…
497	1	306638501	306643000	Drip loss QTL (8300), Fat weight (total) QTL (65021), Loin and ham percentage in carcass QTL (377), Drip loss QTL (8131), Drip loss QTL (8323), body weight (17 weeks) QTL (662), Leaf fat weight QTL (402), Drip loss QTL (8382), Drip loss QTL (8564), Drip loss QTL (80), Drip loss QTL (8063), Umbilical hernia QTL (8742), Drip loss QTL (8480), Drip loss QTL (7936), average daily gain QTL (659), Perce…
498	1	530001	537500
499	1	68982501	68990500	Liver weight QTL (13265), average daily gain QTL (5680), Drip loss QTL (8043), Potassium level QTL (6380), Estimated carcass lean content QTL (5960), CD2-positive leukocyte number QTL (4260), backfat at P2 position QTL (4107), average daily gain QTL (3673), Backfat at rump QTL (21206), Loin muscle area QTL (38072), backfat above muscle dorsi QTL (5237), Feed intake QTL (871), White blood cell cou…
500	1	189909501	189916500	Daily feed intake QTL (141), Drip loss QTL (8300), Average backfat thickness QTL (4016), Backfat weight QTL (12724), average daily gain QTL (5680), Potassium level QTL (6380), CD2-positive leukocyte number QTL (4260), Side fat thickness QTL (5958), pH for Semimembranosus QTL (5665), Head weight QTL (432), Backfat at tenth rib QTL (138), Backfat at rump QTL (21206), Platelet distribution width QTL…
501	1	190182001	190187000	Daily feed intake QTL (141), Drip loss QTL (8300), Average backfat thickness QTL (4016), Backfat weight QTL (12724), average daily gain QTL (5680), Potassium level QTL (6380), CD2-positive leukocyte number QTL (4260), Side fat thickness QTL (5958), pH for Semimembranosus QTL (5665), Head weight QTL (432), Backfat at tenth rib QTL (138), Backfat at rump QTL (21206), Platelet distribution width QTL…
502	1	190187001	190192500	Daily feed intake QTL (141), Drip loss QTL (8300), Average backfat thickness QTL (4016), Backfat weight QTL (12724), average daily gain QTL (5680), Potassium level QTL (6380), CD2-positive leukocyte number QTL (4260), Side fat thickness QTL (5958), pH for Semimembranosus QTL (5665), Head weight QTL (432), Backfat at tenth rib QTL (138), Backfat at rump QTL (21206), Platelet distribution width QTL…
503	1	190309501	190313500	Daily feed intake QTL (141), Drip loss QTL (8300), Average backfat thickness QTL (4016), Backfat weight QTL (12724), average daily gain QTL (5680), Potassium level QTL (6380), CD2-positive leukocyte number QTL (4260), Side fat thickness QTL (5958), pH for Semimembranosus QTL (5665), Head weight QTL (432), Backfat at tenth rib QTL (138), Backfat at rump QTL (21206), Platelet distribution width QTL…
504	1	190401501	190421000	Daily feed intake QTL (141), Drip loss QTL (8300), Average backfat thickness QTL (4016), Backfat weight QTL (12724), average daily gain QTL (5680), Potassium level QTL (6380), CD2-positive leukocyte number QTL (4260), Side fat thickness QTL (5958), pH for Semimembranosus QTL (5665), Head weight QTL (432), Backfat at tenth rib QTL (138), Backfat at rump QTL (21206), Platelet distribution width QTL…
505	1	212583001	212586000	Daily feed intake QTL (141), Drip loss QTL (8300), Backfat weight QTL (12724), average daily gain QTL (5680), Potassium level QTL (6380), CD2-positive leukocyte number QTL (4260), Head weight QTL (432), Backfat at tenth rib QTL (138), Backfat at rump QTL (21206), Platelet distribution width QTL (12312), Loin muscle area QTL (38072), backfat above muscle dorsi QTL (5237), Backfat weight QTL (3171)…
506	1	213428001	213434000	Daily feed intake QTL (141), Drip loss QTL (8300), Backfat weight QTL (12724), average daily gain QTL (5680), Potassium level QTL (6380), CD2-positive leukocyte number QTL (4260), Head weight QTL (432), Backfat at tenth rib QTL (138), Backfat at rump QTL (21206), Platelet distribution width QTL (12312), Loin muscle area QTL (38072), backfat above muscle dorsi QTL (5237), Backfat weight QTL (3171)…
507	1	213469501	213474000	Daily feed intake QTL (141), Drip loss QTL (8300), Backfat weight QTL (12724), average daily gain QTL (5680), Potassium level QTL (6380), CD2-positive leukocyte number QTL (4260), Head weight QTL (432), Backfat at tenth rib QTL (138), Backfat at rump QTL (21206), Platelet distribution width QTL (12312), Loin muscle area QTL (38072), backfat above muscle dorsi QTL (5237), Backfat weight QTL (3171)…
508	1	216175001	216180000	Daily feed intake QTL (141), Drip loss QTL (8300), Backfat weight QTL (12724), average daily gain QTL (5680), Potassium level QTL (6380), CD2-positive leukocyte number QTL (4260), Head weight QTL (432), Backfat at tenth rib QTL (138), Backfat at rump QTL (21206), Platelet distribution width QTL (12312), Loin muscle area QTL (38072), backfat above muscle dorsi QTL (5237), Backfat weight QTL (3171)…
509	1	216188501	216191500	Daily feed intake QTL (141), Drip loss QTL (8300), Backfat weight QTL (12724), average daily gain QTL (5680), Potassium level QTL (6380), CD2-positive leukocyte number QTL (4260), Head weight QTL (432), Backfat at tenth rib QTL (138), Backfat at rump QTL (21206), Platelet distribution width QTL (12312), Loin muscle area QTL (38072), backfat above muscle dorsi QTL (5237), Backfat weight QTL (3171)…
510	1	216217001	216225500	Daily feed intake QTL (141), Drip loss QTL (8300), Backfat weight QTL (12724), average daily gain QTL (5680), Potassium level QTL (6380), CD2-positive leukocyte number QTL (4260), Head weight QTL (432), Backfat at tenth rib QTL (138), Backfat at rump QTL (21206), Platelet distribution width QTL (12312), Loin muscle area QTL (38072), backfat above muscle dorsi QTL (5237), Backfat weight QTL (3171)…
511	1	216318501	216323500	Daily feed intake QTL (141), Drip loss QTL (8300), Backfat weight QTL (12724), average daily gain QTL (5680), Potassium level QTL (6380), CD2-positive leukocyte number QTL (4260), Head weight QTL (432), Backfat at tenth rib QTL (138), Backfat at rump QTL (21206), Platelet distribution width QTL (12312), Loin muscle area QTL (38072), backfat above muscle dorsi QTL (5237), Backfat weight QTL (3171)…
512	1	246312001	246321500	Drip loss QTL (8300), average daily gain QTL (5680), average daily gain QTL (2847), Hind feet conformation QTL (8912), Gestation length QTL (10617), average daily gain QTL (2846), Backfat at rump QTL (21206), Loin muscle area QTL (38072), average daily gain QTL (16887), backfat above muscle dorsi QTL (5237), Fat-cuts percentage QTL (855), Locomotion QTL (478), White blood cell counts QTL (15047),…
513	1	312780501	312788500	Percentage of backfat and leaf fat in carcass QTL (403)
514	1	2599501	2605500
515	1	15054501	15059500	average daily gain QTL (5680), Drip loss QTL (8043), Loin muscle area QTL (38072), Salmonella count in liver QTL (11554), Body weight (birth) QTL (826), Loin muscle area QTL (21352), Stearic acid content QTL (3111), Drip loss QTL (8349), Marbling QTL (38049), Drip loss QTL (8012), Shoulder subcutaneous fat thickness QTL (5671), Loin muscle area QTL (3221), Muscle moisture percentage QTL (38073), …
516	1	24581501	24587500	average daily gain QTL (5680), Drip loss QTL (8043), muscle protein percentage QTL (3838), Loin muscle area QTL (38072), backfat above muscle dorsi QTL (5237), average daily gain QTL (338), White blood cell counts QTL (15047), Conductivity 24 hours post-mortem QTL (21551), PH for Longissmus dorsi QTL (2787), backfat at last rib QTL (5674), CIE-a* QTL (3980), Drip loss QTL (8349), Estimated carcas…
517	1	42582501	42586500	Drip loss QTL (7828), average daily gain QTL (5680), Drip loss QTL (8043), Estimated carcass lean content QTL (5960), muscle protein percentage QTL (3838), CD2-positive leukocyte number QTL (4260), Drip loss QTL (8597), Loin and neck meat weight QTL (807), Loin muscle area QTL (46), Carcass weight (cold) QTL (792), Loin muscle area QTL (38072), Carcass weight (cold) QTL (12710), Carcass weight (h…
518	1	210817001	210822000	Daily feed intake QTL (141), Drip loss QTL (8300), Backfat weight QTL (12724), average daily gain QTL (5680), Potassium level QTL (6380), CD2-positive leukocyte number QTL (4260), Head weight QTL (432), Backfat at tenth rib QTL (138), Backfat at rump QTL (21206), Platelet distribution width QTL (12312), Loin muscle area QTL (38072), backfat above muscle dorsi QTL (5237), Backfat weight QTL (3171)…
519	1	210852001	210857000	Daily feed intake QTL (141), Drip loss QTL (8300), Backfat weight QTL (12724), average daily gain QTL (5680), Potassium level QTL (6380), CD2-positive leukocyte number QTL (4260), Head weight QTL (432), Backfat at tenth rib QTL (138), Backfat at rump QTL (21206), Platelet distribution width QTL (12312), Loin muscle area QTL (38072), backfat above muscle dorsi QTL (5237), Backfat weight QTL (3171)…
520	1	210977001	210981000	Daily feed intake QTL (141), Drip loss QTL (8300), Backfat weight QTL (12724), average daily gain QTL (5680), Potassium level QTL (6380), CD2-positive leukocyte number QTL (4260), Head weight QTL (432), Backfat at tenth rib QTL (138), Backfat at rump QTL (21206), Platelet distribution width QTL (12312), Loin muscle area QTL (38072), backfat above muscle dorsi QTL (5237), Backfat weight QTL (3171)…
521	1	211007501	211013000	Daily feed intake QTL (141), Drip loss QTL (8300), Backfat weight QTL (12724), average daily gain QTL (5680), Potassium level QTL (6380), CD2-positive leukocyte number QTL (4260), Head weight QTL (432), Backfat at tenth rib QTL (138), Backfat at rump QTL (21206), Platelet distribution width QTL (12312), Loin muscle area QTL (38072), backfat above muscle dorsi QTL (5237), Backfat weight QTL (3171)…
522	1	211010501	211020500	Daily feed intake QTL (141), Drip loss QTL (8300), Backfat weight QTL (12724), average daily gain QTL (5680), Potassium level QTL (6380), CD2-positive leukocyte number QTL (4260), Head weight QTL (432), Backfat at tenth rib QTL (138), Backfat at rump QTL (21206), Platelet distribution width QTL (12312), Loin muscle area QTL (38072), backfat above muscle dorsi QTL (5237), Backfat weight QTL (3171)…
523	1	246092501	246097000	Drip loss QTL (8300), average daily gain QTL (5680), average daily gain QTL (2847), Hind feet conformation QTL (8912), Gestation length QTL (10617), average daily gain QTL (2846), Backfat at rump QTL (21206), Loin muscle area QTL (38072), average daily gain QTL (16887), backfat above muscle dorsi QTL (5237), Fat-cuts percentage QTL (855), Locomotion QTL (478), White blood cell counts QTL (15047),…
524	1	246101001	246105000	Drip loss QTL (8300), average daily gain QTL (5680), average daily gain QTL (2847), Hind feet conformation QTL (8912), Gestation length QTL (10617), average daily gain QTL (2846), Backfat at rump QTL (21206), Loin muscle area QTL (38072), average daily gain QTL (16887), backfat above muscle dorsi QTL (5237), Fat-cuts percentage QTL (855), Locomotion QTL (478), White blood cell counts QTL (15047),…
525	1	246105001	246107500	Drip loss QTL (8300), average daily gain QTL (5680), average daily gain QTL (2847), Hind feet conformation QTL (8912), Gestation length QTL (10617), average daily gain QTL (2846), Backfat at rump QTL (21206), Loin muscle area QTL (38072), average daily gain QTL (16887), backfat above muscle dorsi QTL (5237), Fat-cuts percentage QTL (855), Locomotion QTL (478), White blood cell counts QTL (15047),…
526	1	260792501	260796500	Drip loss QTL (8300), average daily gain QTL (5680), average daily gain QTL (2847), Gestation length QTL (10617), average daily gain QTL (2846), Backfat at rump QTL (21206), Loin muscle area QTL (38072), average daily gain QTL (16887), backfat above muscle dorsi QTL (5237), Fat-cuts percentage QTL (855), White blood cell counts QTL (15047), Drip loss QTL (8131), average daily gain QTL (22269), ba…
527	1	276996001	277004500	Average backfat thickness QTL (35), Drip loss QTL (8300), Average backfat thickness QTL (3145), External fat on ham QTL (861), average daily gain QTL (5680), Average backfat thickness QTL (310), Drip loss QTL (8177), White blood cell counts QTL (5456), PH for Longissmus dorsi QTL (3169), Lean cuts percentage QTL (808), Backfat at rump QTL (21206), Vertebra number QTL (21301), Loin muscle area QTL…
528	1	293206001	293211500	Average backfat thickness QTL (35), Fat to meat ratio QTL (12739), Drip loss QTL (8300), Lean meat percentage QTL (824), Average backfat thickness QTL (3145), Fat-cuts percentage QTL (12727), PH for Longissmus dorsi QTL (3169), Backfat weight QTL (3149), Ham weight QTL (3148), Drip loss QTL (8131), Drip loss QTL (8323), backfat at last rib QTL (16833), Average backfat thickness QTL (192), body we…
529	1	293957001	293961000	Average backfat thickness QTL (35), Fat to meat ratio QTL (12739), Drip loss QTL (8300), Lean meat percentage QTL (824), Average backfat thickness QTL (3145), Fat-cuts percentage QTL (12727), PH for Longissmus dorsi QTL (3169), Backfat weight QTL (3149), Ham weight QTL (3148), Drip loss QTL (8131), Drip loss QTL (8323), backfat at last rib QTL (16833), body weight (17 weeks) QTL (662), Drip loss …
530	1	294109001	294117000	Average backfat thickness QTL (35), Fat to meat ratio QTL (12739), Drip loss QTL (8300), Lean meat percentage QTL (824), Average backfat thickness QTL (3145), Fat-cuts percentage QTL (12727), PH for Longissmus dorsi QTL (3169), Backfat weight QTL (3149), Ham weight QTL (3148), Drip loss QTL (8131), Drip loss QTL (8323), backfat at last rib QTL (16833), body weight (17 weeks) QTL (662), Drip loss …
531	1	311228001	311234500	Drip loss QTL (8162), Drip loss QTL (7837), Drip loss QTL (7964), Drip loss QTL (7862), Leaf fat weight QTL (402), mummified pigs QTL (18240), Umbilical hernia QTL (8742), Drip loss QTL (8563), Percentage of backfat and leaf fat in carcass QTL (403), Drip loss QTL (8008), Ham weight QTL (376), Fat percentage in carcass QTL (65022), Loin weight QTL (375)
532	1	312719501	312758000	Percentage of backfat and leaf fat in carcass QTL (403)
533	1	314491001	314496500	Percentage of backfat and leaf fat in carcass QTL (403)
534	1	37171501	37176500	Drip loss QTL (7828), average daily gain QTL (5680), Drip loss QTL (8043), Estimated carcass lean content QTL (5960), muscle protein percentage QTL (3838), CD2-positive leukocyte number QTL (4260), Drip loss QTL (8597), Loin and neck meat weight QTL (807), Loin muscle area QTL (46), Carcass weight (cold) QTL (792), Loin muscle area QTL (38072), Carcass weight (cold) QTL (12710), Carcass weight (h…
535	1	46800501	46814500	average daily gain QTL (5680), Drip loss QTL (8043), Estimated carcass lean content QTL (5960), muscle protein percentage QTL (3838), CD2-positive leukocyte number QTL (4260), Loin and neck meat weight QTL (807), Loin muscle area QTL (46), Carcass weight (cold) QTL (792), Backfat at rump QTL (21206), Loin muscle area QTL (38072), Carcass weight (cold) QTL (12710), Carcass weight (hot) QTL (16896)…
536	1	47218501	47240500	average daily gain QTL (5680), Drip loss QTL (8043), Estimated carcass lean content QTL (5960), muscle protein percentage QTL (3838), CD2-positive leukocyte number QTL (4260), Loin and neck meat weight QTL (807), Loin muscle area QTL (46), Carcass weight (cold) QTL (792), Backfat at rump QTL (21206), Loin muscle area QTL (38072), Carcass weight (cold) QTL (12710), Carcass weight (hot) QTL (16896)…
537	1	63801001	63808500	average daily gain QTL (5680), Drip loss QTL (8043), Potassium level QTL (6380), Estimated carcass lean content QTL (5960), CD2-positive leukocyte number QTL (4260), backfat at P2 position QTL (4107), average daily gain QTL (3673), Backfat at rump QTL (21206), Loin muscle area QTL (38072), backfat above muscle dorsi QTL (5237), Feed intake QTL (871), White blood cell counts QTL (15047), Carcass w…
538	1	163766001	163771500	Daily feed intake QTL (141), Drip loss QTL (8300), average daily gain QTL (5680), Potassium level QTL (6380), CD2-positive leukocyte number QTL (4260), Side fat thickness QTL (5958), pH for Semimembranosus QTL (5665), Backfat at tenth rib QTL (138), Backfat at rump QTL (21206), Platelet distribution width QTL (12312), Loin muscle area QTL (38072), backfat above muscle dorsi QTL (5237), Backfat we…
539	1	163774501	163782000	Daily feed intake QTL (141), Drip loss QTL (8300), average daily gain QTL (5680), Potassium level QTL (6380), CD2-positive leukocyte number QTL (4260), Side fat thickness QTL (5958), pH for Semimembranosus QTL (5665), Backfat at tenth rib QTL (138), Backfat at rump QTL (21206), Platelet distribution width QTL (12312), Loin muscle area QTL (38072), backfat above muscle dorsi QTL (5237), Backfat we…
540	1	193885501	193889500	Daily feed intake QTL (141), Drip loss QTL (8300), Average backfat thickness QTL (4016), Backfat weight QTL (12724), average daily gain QTL (5680), Potassium level QTL (6380), CD2-positive leukocyte number QTL (4260), Side fat thickness QTL (5958), pH for Semimembranosus QTL (5665), Head weight QTL (432), Backfat at tenth rib QTL (138), Backfat at rump QTL (21206), Platelet distribution width QTL…
541	1	292346001	292350000	Average backfat thickness QTL (35), Fat to meat ratio QTL (12739), Drip loss QTL (8300), Lean meat percentage QTL (824), backfat at last rib QTL (3666), Average backfat thickness QTL (3145), Drip loss QTL (8097), average daily gain QTL (5680), Fat-cuts percentage QTL (12727), PH for Longissmus dorsi QTL (3169), Loin muscle area QTL (38072), backfat above muscle dorsi QTL (5237), average daily gai…
542	1	296762001	296778500	Average backfat thickness QTL (35), Drip loss QTL (8300), Average backfat thickness QTL (3145), PH for Longissmus dorsi QTL (3169), Backfat weight QTL (3149), Ham weight QTL (3148), Drip loss QTL (8131), Drip loss QTL (8323), body weight (17 weeks) QTL (662), Leaf fat weight QTL (402), Drip loss QTL (8382), Drip loss QTL (8564), backfat at last rib QTL (27), Drip loss QTL (80), Lean meat percenta…
543	1	296811001	296815500	Average backfat thickness QTL (35), Drip loss QTL (8300), Average backfat thickness QTL (3145), PH for Longissmus dorsi QTL (3169), Backfat weight QTL (3149), Ham weight QTL (3148), Drip loss QTL (8131), Drip loss QTL (8323), body weight (17 weeks) QTL (662), Leaf fat weight QTL (402), Drip loss QTL (8382), Drip loss QTL (8564), backfat at last rib QTL (27), Drip loss QTL (80), Lean meat percenta…
544	1	297863501	297871500	Average backfat thickness QTL (35), Drip loss QTL (8300), Average backfat thickness QTL (3145), PH for Longissmus dorsi QTL (3169), Backfat weight QTL (3149), Ham weight QTL (3148), Drip loss QTL (8131), Drip loss QTL (8323), body weight (17 weeks) QTL (662), Leaf fat weight QTL (402), Drip loss QTL (8382), Drip loss QTL (8564), backfat at last rib QTL (27), Drip loss QTL (80), Lean meat percenta…
545	1	300929501	300935000	Average backfat thickness QTL (35), Drip loss QTL (8300), Average backfat thickness QTL (3145), PH for Longissmus dorsi QTL (3169), Backfat weight QTL (3149), Loin and ham percentage in carcass QTL (377), Ham weight QTL (3148), Drip loss QTL (8131), Drip loss QTL (8323), body weight (17 weeks) QTL (662), Leaf fat weight QTL (402), Drip loss QTL (8382), Drip loss QTL (8564), backfat at last rib QT…
546	1	315501	326500
547	1	710501	719000
548	1	763501	778500
549	1	2159001	2164500
550	1	2191001	2195000
551	1	2192501	2201000
552	1	2553501	2562500
553	1	2611001	2621500
554	1	29712001	29715500	average daily gain QTL (5680), Drip loss QTL (8043), muscle protein percentage QTL (3838), Loin muscle area QTL (46), Loin muscle area QTL (38072), Carcass weight (hot) QTL (16896), backfat above muscle dorsi QTL (5237), average daily gain QTL (338), White blood cell counts QTL (15047), Drip loss QTL (8230), PH for Longissmus dorsi QTL (2787), backfat at last rib QTL (5674), CIE-a* QTL (3980), Dr…
555	1	45337001	45342000	Drip loss QTL (7828), average daily gain QTL (5680), Drip loss QTL (8043), Estimated carcass lean content QTL (5960), muscle protein percentage QTL (3838), CD2-positive leukocyte number QTL (4260), Drip loss QTL (8597), Loin and neck meat weight QTL (807), Loin muscle area QTL (46), Carcass weight (cold) QTL (792), Backfat at rump QTL (21206), Loin muscle area QTL (38072), Carcass weight (cold) Q…
556	1	100986501	100990500	Drip loss QTL (7766), average daily gain QTL (5680), Drip loss QTL (8043), Potassium level QTL (6380), Estimated carcass lean content QTL (5960), CD2-positive leukocyte number QTL (4260), backfat at P2 position QTL (4107), Drip loss QTL (8450), CIE-L* QTL (4326), average daily gain QTL (3673), Backfat at rump QTL (21206), Loin muscle area QTL (38072), backfat above muscle dorsi QTL (5237), Ear we…
557	1	273944001	273949000	Average backfat thickness QTL (35), Drip loss QTL (8300), Average backfat thickness QTL (3145), External fat on ham QTL (861), average daily gain QTL (5680), Average backfat thickness QTL (310), White blood cell counts QTL (5456), PH for Longissmus dorsi QTL (3169), Gestation length QTL (10617), Lean cuts percentage QTL (808), Backfat at rump QTL (21206), Vertebra number QTL (21301), Loin muscle …
558	1	613501	621000
559	1	816001	822000
560	1	8297501	8303000	Drip loss QTL (8081), average daily gain QTL (5680), Drip loss QTL (8628), indole, laboratory QTL (106214), Loin muscle area QTL (38072), Body weight (birth) QTL (826), Loin muscle area QTL (21352), Musculus gluteus weight QTL (1276), Non-return rate QTL (18535), Stearic acid content QTL (3111), Drip loss QTL (8295), Marbling QTL (38049), Shoulder subcutaneous fat thickness QTL (5671), Drip loss …
561	1	9129501	9137000	average daily gain QTL (5680), Loin muscle area QTL (38072), CIE-a* QTL (28043), Body weight (birth) QTL (826), Loin muscle area QTL (21352), Musculus gluteus weight QTL (1276), Stearic acid content QTL (3111), Plateletcrit QTL (107303), Marbling QTL (38049), Shoulder subcutaneous fat thickness QTL (5671), Loin muscle area QTL (3221), Platelet count QTL (107311), Muscle moisture percentage QTL (3…
562	1	9135501	9140000	average daily gain QTL (5680), Loin muscle area QTL (38072), CIE-a* QTL (28043), Body weight (birth) QTL (826), Loin muscle area QTL (21352), Musculus gluteus weight QTL (1276), Stearic acid content QTL (3111), Plateletcrit QTL (107303), Marbling QTL (38049), Shoulder subcutaneous fat thickness QTL (5671), Loin muscle area QTL (3221), Platelet count QTL (107311), Muscle moisture percentage QTL (3…
563	1	30904501	30913000	average daily gain QTL (5680), Drip loss QTL (8043), muscle protein percentage QTL (3838), Loin muscle area QTL (46), Loin muscle area QTL (38072), Carcass weight (hot) QTL (16896), backfat above muscle dorsi QTL (5237), average daily gain QTL (338), White blood cell counts QTL (15047), PH for Longissmus dorsi QTL (2787), backfat at last rib QTL (5674), CIE-a* QTL (3980), Drip loss QTL (8349), Es…
564	1	31116001	31128500	average daily gain QTL (5680), Drip loss QTL (8043), muscle protein percentage QTL (3838), Loin muscle area QTL (46), Loin muscle area QTL (38072), Carcass weight (hot) QTL (16896), backfat above muscle dorsi QTL (5237), average daily gain QTL (338), White blood cell counts QTL (15047), PH for Longissmus dorsi QTL (2787), backfat at last rib QTL (5674), CIE-a* QTL (3980), Drip loss QTL (8349), Es…
565	1	31133001	31139000	average daily gain QTL (5680), Drip loss QTL (8043), muscle protein percentage QTL (3838), Loin muscle area QTL (46), Loin muscle area QTL (38072), Carcass weight (hot) QTL (16896), backfat above muscle dorsi QTL (5237), average daily gain QTL (338), White blood cell counts QTL (15047), PH for Longissmus dorsi QTL (2787), backfat at last rib QTL (5674), CIE-a* QTL (3980), Drip loss QTL (8349), Es…
566	1	47657501	47662000	average daily gain QTL (5680), Drip loss QTL (8043), Estimated carcass lean content QTL (5960), muscle protein percentage QTL (3838), CD2-positive leukocyte number QTL (4260), Loin and neck meat weight QTL (807), Loin muscle area QTL (46), Carcass weight (cold) QTL (792), Backfat at rump QTL (21206), Loin muscle area QTL (38072), Carcass weight (cold) QTL (12710), Carcass weight (hot) QTL (16896)…
567	1	49912001	49914500	average daily gain QTL (5680), Drip loss QTL (8043), Estimated carcass lean content QTL (5960), muscle protein percentage QTL (3838), CD2-positive leukocyte number QTL (4260), Loin and neck meat weight QTL (807), Loin muscle area QTL (46), Carcass weight (cold) QTL (792), Backfat at rump QTL (21206), Loin muscle area QTL (38072), Carcass weight (cold) QTL (12710), Carcass weight (hot) QTL (16896)…
568	1	51158501	51163000	average daily gain QTL (5680), Drip loss QTL (8043), Estimated carcass lean content QTL (5960), muscle protein percentage QTL (3838), CD2-positive leukocyte number QTL (4260), Loin and neck meat weight QTL (807), Loin muscle area QTL (46), Carcass weight (cold) QTL (792), Backfat at rump QTL (21206), Loin muscle area QTL (38072), Carcass weight (cold) QTL (12710), Carcass weight (hot) QTL (16896)…
569	1	54488001	54498000	average daily gain QTL (5680), Drip loss QTL (8043), Estimated carcass lean content QTL (5960), CD2-positive leukocyte number QTL (4260), Backfat at rump QTL (21206), Loin muscle area QTL (38072), backfat above muscle dorsi QTL (5237), Feed intake QTL (871), White blood cell counts QTL (15047), backfat at last rib QTL (5674), Marbling QTL (4019), Head weight QTL (860), Drip loss QTL (8349), Estim…
570	1	68988501	68995500	Liver weight QTL (13265), average daily gain QTL (5680), Drip loss QTL (8043), Potassium level QTL (6380), Estimated carcass lean content QTL (5960), CD2-positive leukocyte number QTL (4260), backfat at P2 position QTL (4107), average daily gain QTL (3673), Backfat at rump QTL (21206), Loin muscle area QTL (38072), backfat above muscle dorsi QTL (5237), Feed intake QTL (871), White blood cell cou…
571	1	69253501	69262500	Liver weight QTL (13265), average daily gain QTL (5680), Drip loss QTL (8043), Potassium level QTL (6380), Estimated carcass lean content QTL (5960), CD2-positive leukocyte number QTL (4260), backfat at P2 position QTL (4107), average daily gain QTL (3673), Backfat at rump QTL (21206), Loin muscle area QTL (38072), backfat above muscle dorsi QTL (5237), Feed intake QTL (871), White blood cell cou…
572	1	69355001	69366500	Liver weight QTL (13265), average daily gain QTL (5680), Drip loss QTL (8043), Potassium level QTL (6380), Estimated carcass lean content QTL (5960), CD2-positive leukocyte number QTL (4260), backfat at P2 position QTL (4107), average daily gain QTL (3673), Backfat at rump QTL (21206), Loin muscle area QTL (38072), backfat above muscle dorsi QTL (5237), Feed intake QTL (871), White blood cell cou…
573	1	88213001	88220500	average daily gain QTL (5680), Drip loss QTL (8043), Potassium level QTL (6380), Estimated carcass lean content QTL (5960), CD2-positive leukocyte number QTL (4260), backfat at P2 position QTL (4107), average daily gain QTL (3673), Backfat at rump QTL (21206), Loin muscle area QTL (38072), backfat above muscle dorsi QTL (5237), Ear weight QTL (8853), Feed intake QTL (871), White blood cell counts…
574	1	100107001	100110000	Drip loss QTL (7766), average daily gain QTL (5680), Drip loss QTL (8043), Potassium level QTL (6380), Estimated carcass lean content QTL (5960), CD2-positive leukocyte number QTL (4260), backfat at P2 position QTL (4107), Drip loss QTL (8450), CIE-L* QTL (4326), average daily gain QTL (3673), Backfat at rump QTL (21206), Loin muscle area QTL (38072), backfat above muscle dorsi QTL (5237), Ear we…
575	1	154762501	154764500	Drip loss QTL (8300), average daily gain QTL (5680), Potassium level QTL (6380), CD2-positive leukocyte number QTL (4260), Side fat thickness QTL (5958), pH for Semimembranosus QTL (5665), Backfat at rump QTL (21206), Platelet distribution width QTL (12312), Loin muscle area QTL (38072), backfat above muscle dorsi QTL (5237), Ear weight QTL (8853), Backfat weight QTL (3171), Feed intake QTL (871)…
576	1	211538001	211542000	Daily feed intake QTL (141), Drip loss QTL (8300), Backfat weight QTL (12724), average daily gain QTL (5680), Potassium level QTL (6380), CD2-positive leukocyte number QTL (4260), Head weight QTL (432), Backfat at tenth rib QTL (138), Backfat at rump QTL (21206), Platelet distribution width QTL (12312), Loin muscle area QTL (38072), backfat above muscle dorsi QTL (5237), Backfat weight QTL (3171)…
577	1	242905501	242907500	Drip loss QTL (8300), average daily gain QTL (5680), average daily gain QTL (2847), Hind feet conformation QTL (8912), Gestation length QTL (10617), average daily gain QTL (2846), Backfat at rump QTL (21206), Loin muscle area QTL (38072), average daily gain QTL (16887), backfat above muscle dorsi QTL (5237), Fat-cuts percentage QTL (855), Locomotion QTL (478), White blood cell counts QTL (15047),…
578	1	251975001	251981500	Drip loss QTL (8300), average daily gain QTL (5680), average daily gain QTL (2847), Hind feet conformation QTL (8912), Gestation length QTL (10617), average daily gain QTL (2846), Backfat at rump QTL (21206), Loin muscle area QTL (38072), average daily gain QTL (16887), backfat above muscle dorsi QTL (5237), Fat-cuts percentage QTL (855), Locomotion QTL (478), White blood cell counts QTL (15047),…
579	1	277897501	277905500	Average backfat thickness QTL (35), Drip loss QTL (8300), Average backfat thickness QTL (3145), External fat on ham QTL (861), average daily gain QTL (5680), White blood cell counts QTL (5456), PH for Longissmus dorsi QTL (3169), Lean cuts percentage QTL (808), Backfat at rump QTL (21206), Vertebra number QTL (21301), Loin muscle area QTL (38072), backfat above muscle dorsi QTL (5237), Thoracic v…
580	1	277904501	277918000	Average backfat thickness QTL (35), Drip loss QTL (8300), Average backfat thickness QTL (3145), External fat on ham QTL (861), average daily gain QTL (5680), White blood cell counts QTL (5456), PH for Longissmus dorsi QTL (3169), Lean cuts percentage QTL (808), Backfat at rump QTL (21206), Vertebra number QTL (21301), Loin muscle area QTL (38072), backfat above muscle dorsi QTL (5237), Thoracic v…
581	1	277944001	277957500	Average backfat thickness QTL (35), Drip loss QTL (8300), Average backfat thickness QTL (3145), External fat on ham QTL (861), average daily gain QTL (5680), White blood cell counts QTL (5456), PH for Longissmus dorsi QTL (3169), Lean cuts percentage QTL (808), Backfat at rump QTL (21206), Vertebra number QTL (21301), Loin muscle area QTL (38072), backfat above muscle dorsi QTL (5237), Thoracic v…
582	1	293315001	293318500	Average backfat thickness QTL (35), Fat to meat ratio QTL (12739), Drip loss QTL (8300), Lean meat percentage QTL (824), Average backfat thickness QTL (3145), Fat-cuts percentage QTL (12727), PH for Longissmus dorsi QTL (3169), Backfat weight QTL (3149), Ham weight QTL (3148), Drip loss QTL (8131), Drip loss QTL (8323), backfat at last rib QTL (16833), Average backfat thickness QTL (192), body we…
583	1	294850001	294864500	Average backfat thickness QTL (35), Drip loss QTL (8300), Average backfat thickness QTL (3145), PH for Longissmus dorsi QTL (3169), Backfat weight QTL (3149), Ham weight QTL (3148), Drip loss QTL (8131), Drip loss QTL (8323), body weight (17 weeks) QTL (662), Leaf fat weight QTL (402), Drip loss QTL (8382), Drip loss QTL (8564), backfat at last rib QTL (27), Drip loss QTL (80), Lean meat percenta…
584	1	296953001	296961000	Average backfat thickness QTL (35), Drip loss QTL (8300), Average backfat thickness QTL (3145), PH for Longissmus dorsi QTL (3169), Backfat weight QTL (3149), Ham weight QTL (3148), Drip loss QTL (8131), Drip loss QTL (8323), body weight (17 weeks) QTL (662), Leaf fat weight QTL (402), Drip loss QTL (8382), Drip loss QTL (8564), backfat at last rib QTL (27), Drip loss QTL (80), Lean meat percenta…
585	1	306410501	306415000	Drip loss QTL (8300), Fat weight (total) QTL (65021), Loin and ham percentage in carcass QTL (377), Drip loss QTL (8131), Drip loss QTL (8323), body weight (17 weeks) QTL (662), Leaf fat weight QTL (402), Drip loss QTL (8382), Drip loss QTL (8564), Drip loss QTL (80), Drip loss QTL (8063), Umbilical hernia QTL (8742), Drip loss QTL (8480), Drip loss QTL (7936), average daily gain QTL (659), Perce…
586	1	314215001	314218500	Percentage of backfat and leaf fat in carcass QTL (403)
587	1	8323001	8334500	Drip loss QTL (8081), average daily gain QTL (5680), Drip loss QTL (8628), indole, laboratory QTL (106214), Loin muscle area QTL (38072), Body weight (birth) QTL (826), Loin muscle area QTL (21352), Musculus gluteus weight QTL (1276), Non-return rate QTL (18535), Stearic acid content QTL (3111), Drip loss QTL (8295), Marbling QTL (38049), Shoulder subcutaneous fat thickness QTL (5671), Drip loss …
588	1	15265501	15270500	average daily gain QTL (5680), Drip loss QTL (8043), Loin muscle area QTL (38072), Salmonella count in liver QTL (11554), Body weight (birth) QTL (826), Loin muscle area QTL (21352), Stearic acid content QTL (3111), Drip loss QTL (8349), Marbling QTL (38049), Drip loss QTL (8012), Shoulder subcutaneous fat thickness QTL (5671), Loin muscle area QTL (3221), Muscle moisture percentage QTL (38073), …
589	1	54715001	54718500	average daily gain QTL (5680), Drip loss QTL (8043), Estimated carcass lean content QTL (5960), CD2-positive leukocyte number QTL (4260), Backfat at rump QTL (21206), Loin muscle area QTL (38072), backfat above muscle dorsi QTL (5237), Feed intake QTL (871), White blood cell counts QTL (15047), backfat at last rib QTL (5674), Marbling QTL (4019), Head weight QTL (860), Drip loss QTL (8349), Estim…
590	1	89053001	89057500	average daily gain QTL (5680), Drip loss QTL (8043), Potassium level QTL (6380), Estimated carcass lean content QTL (5960), CD2-positive leukocyte number QTL (4260), backfat at P2 position QTL (4107), average daily gain QTL (3673), Backfat at rump QTL (21206), Loin muscle area QTL (38072), backfat above muscle dorsi QTL (5237), Ear weight QTL (8853), Feed intake QTL (871), White blood cell counts…
591	1	133833501	133840000	Drip loss QTL (8300), average daily gain QTL (5680), Potassium level QTL (6380), Fat percentage in carcass QTL (65014), CD2-positive leukocyte number QTL (4260), pH for Semimembranosus QTL (5665), CIE-L* QTL (4326), Backfat at rump QTL (21206), Platelet distribution width QTL (12312), Loin muscle area QTL (38072), backfat above muscle dorsi QTL (5237), Ear weight QTL (8853), Backfat weight QTL (3…
592	1	292354001	292359000	Average backfat thickness QTL (35), Fat to meat ratio QTL (12739), Drip loss QTL (8300), Lean meat percentage QTL (824), backfat at last rib QTL (3666), Average backfat thickness QTL (3145), Drip loss QTL (8097), average daily gain QTL (5680), Fat-cuts percentage QTL (12727), PH for Longissmus dorsi QTL (3169), Loin muscle area QTL (38072), backfat above muscle dorsi QTL (5237), average daily gai…
593	1	295146501	295153500	Average backfat thickness QTL (35), Drip loss QTL (8300), Average backfat thickness QTL (3145), PH for Longissmus dorsi QTL (3169), Backfat weight QTL (3149), Ham weight QTL (3148), Drip loss QTL (8131), Drip loss QTL (8323), body weight (17 weeks) QTL (662), Leaf fat weight QTL (402), Drip loss QTL (8382), Drip loss QTL (8564), backfat at last rib QTL (27), Drip loss QTL (80), Lean meat percenta…
594	1	24371501	24378000	average daily gain QTL (5680), Drip loss QTL (8043), muscle protein percentage QTL (3838), Loin muscle area QTL (38072), backfat above muscle dorsi QTL (5237), average daily gain QTL (338), White blood cell counts QTL (15047), PH for Longissmus dorsi QTL (2787), backfat at last rib QTL (5674), CIE-a* QTL (3980), Drip loss QTL (8349), Estimated carcass lean content QTL (5678), Marbling QTL (38049)…
595	1	59457501	59461000	Daily feed intake QTL (22384), average daily gain QTL (5680), Drip loss QTL (8043), Daily feed intake QTL (22387), Estimated carcass lean content QTL (5960), CD2-positive leukocyte number QTL (4260), Backfat at rump QTL (21206), Loin muscle area QTL (38072), backfat above muscle dorsi QTL (5237), Daily feed intake QTL (22370), Feed intake QTL (871), White blood cell counts QTL (15047), Daily feed…
596	1	90581501	90589500	Drip loss QTL (8146), average daily gain QTL (5680), Drip loss QTL (8043), Potassium level QTL (6380), Estimated carcass lean content QTL (5960), CD2-positive leukocyte number QTL (4260), backfat at P2 position QTL (4107), average daily gain QTL (3673), Backfat at rump QTL (21206), Loin muscle area QTL (38072), backfat above muscle dorsi QTL (5237), Ear weight QTL (8853), Feed intake QTL (871), W…
597	1	120287001	120289000	Drip loss QTL (8300), average daily gain QTL (5680), Potassium level QTL (6380), CD2-positive leukocyte number QTL (4260), backfat at P2 position QTL (4107), pH for Semimembranosus QTL (5665), CIE-L* QTL (4326), average daily gain QTL (3673), Backfat at rump QTL (21206), Loin muscle area QTL (38072), backfat above muscle dorsi QTL (5237), Ear weight QTL (8853), Backfat weight QTL (3171), Feed int…
598	1	140053001	140057500	Drip loss QTL (8300), average daily gain QTL (5680), Potassium level QTL (6380), CD2-positive leukocyte number QTL (4260), pH for Semimembranosus QTL (5665), CIE-L* QTL (4326), Backfat at rump QTL (21206), Platelet distribution width QTL (12312), Loin muscle area QTL (38072), backfat above muscle dorsi QTL (5237), Ear weight QTL (8853), Backfat weight QTL (3171), Feed intake QTL (871), White bloo…
599	1	163439501	163443500	Daily feed intake QTL (141), Drip loss QTL (8300), average daily gain QTL (5680), Potassium level QTL (6380), CD2-positive leukocyte number QTL (4260), Side fat thickness QTL (5958), pH for Semimembranosus QTL (5665), Backfat at tenth rib QTL (138), Backfat at rump QTL (21206), Platelet distribution width QTL (12312), Loin muscle area QTL (38072), backfat above muscle dorsi QTL (5237), Backfat we…
600	1	193296501	193299000	Daily feed intake QTL (141), Drip loss QTL (8300), Average backfat thickness QTL (4016), Backfat weight QTL (12724), average daily gain QTL (5680), Potassium level QTL (6380), CD2-positive leukocyte number QTL (4260), Side fat thickness QTL (5958), pH for Semimembranosus QTL (5665), Head weight QTL (432), Backfat at tenth rib QTL (138), Backfat at rump QTL (21206), Platelet distribution width QTL…
601	1	193420001	193426000	Daily feed intake QTL (141), Drip loss QTL (8300), Average backfat thickness QTL (4016), Backfat weight QTL (12724), average daily gain QTL (5680), Potassium level QTL (6380), CD2-positive leukocyte number QTL (4260), Side fat thickness QTL (5958), pH for Semimembranosus QTL (5665), Head weight QTL (432), Backfat at tenth rib QTL (138), Backfat at rump QTL (21206), Platelet distribution width QTL…
602	1	195572501	195578000	Daily feed intake QTL (141), Drip loss QTL (8300), Average backfat thickness QTL (4016), Backfat weight QTL (12724), average daily gain QTL (5680), Potassium level QTL (6380), CD2-positive leukocyte number QTL (4260), Side fat thickness QTL (5958), pH for Semimembranosus QTL (5665), Head weight QTL (432), Backfat at tenth rib QTL (138), Backfat at rump QTL (21206), Platelet distribution width QTL…
603	1	210822001	210832500	Daily feed intake QTL (141), Drip loss QTL (8300), Backfat weight QTL (12724), average daily gain QTL (5680), Potassium level QTL (6380), CD2-positive leukocyte number QTL (4260), Head weight QTL (432), Backfat at tenth rib QTL (138), Backfat at rump QTL (21206), Platelet distribution width QTL (12312), Loin muscle area QTL (38072), backfat above muscle dorsi QTL (5237), Backfat weight QTL (3171)…
604	1	216359501	216366500	Daily feed intake QTL (141), Drip loss QTL (8300), Backfat weight QTL (12724), average daily gain QTL (5680), Potassium level QTL (6380), CD2-positive leukocyte number QTL (4260), Head weight QTL (432), Backfat at tenth rib QTL (138), Backfat at rump QTL (21206), Platelet distribution width QTL (12312), Loin muscle area QTL (38072), backfat above muscle dorsi QTL (5237), Backfat weight QTL (3171)…
605	1	236275501	236289500	Drip loss QTL (8300), average daily gain QTL (5680), average daily gain QTL (2847), Hind feet conformation QTL (8912), Gestation length QTL (10617), average daily gain QTL (2846), Backfat at rump QTL (21206), Platelet distribution width QTL (12312), Loin muscle area QTL (38072), average daily gain QTL (16887), backfat above muscle dorsi QTL (5237), Fat-cuts percentage QTL (855), Locomotion QTL (4…
606	1	249866001	249868000	Drip loss QTL (8300), average daily gain QTL (5680), average daily gain QTL (2847), Hind feet conformation QTL (8912), Gestation length QTL (10617), average daily gain QTL (2846), Backfat at rump QTL (21206), Loin muscle area QTL (38072), average daily gain QTL (16887), backfat above muscle dorsi QTL (5237), Fat-cuts percentage QTL (855), Locomotion QTL (478), White blood cell counts QTL (15047),…
607	1	295165501	295171000	Average backfat thickness QTL (35), Drip loss QTL (8300), Average backfat thickness QTL (3145), PH for Longissmus dorsi QTL (3169), Backfat weight QTL (3149), Ham weight QTL (3148), Drip loss QTL (8131), Drip loss QTL (8323), body weight (17 weeks) QTL (662), Leaf fat weight QTL (402), Drip loss QTL (8382), Drip loss QTL (8564), backfat at last rib QTL (27), Drip loss QTL (80), Lean meat percenta…
608	1	305980501	305984500	Average backfat thickness QTL (35), Drip loss QTL (8300), Average backfat thickness QTL (3145), PH for Longissmus dorsi QTL (3169), Fat weight (total) QTL (65021), Backfat weight QTL (3149), Loin and ham percentage in carcass QTL (377), Ham weight QTL (3148), Drip loss QTL (8131), Drip loss QTL (8323), body weight (17 weeks) QTL (662), Leaf fat weight QTL (402), Drip loss QTL (8382), Drip loss QT…
609	1	306744001	306747500	Drip loss QTL (8300), Fat weight (total) QTL (65021), Loin and ham percentage in carcass QTL (377), Drip loss QTL (8131), Drip loss QTL (8323), body weight (17 weeks) QTL (662), Leaf fat weight QTL (402), Drip loss QTL (8382), Drip loss QTL (8564), Drip loss QTL (80), Drip loss QTL (8063), Umbilical hernia QTL (8742), Drip loss QTL (8480), Drip loss QTL (7936), average daily gain QTL (659), Perce…
610	1	312982001	312986000	Percentage of backfat and leaf fat in carcass QTL (403)
611	1	314345501	314354000	Percentage of backfat and leaf fat in carcass QTL (403)
612	1	314355501	314360000	Percentage of backfat and leaf fat in carcass QTL (403)
613	1	314708001	314715000	Percentage of backfat and leaf fat in carcass QTL (403)
614	1	1507501	1512500
615	1	1973501	1986000
616	1	9233501	9239500	average daily gain QTL (5680), Loin muscle area QTL (38072), CIE-a* QTL (28043), Body weight (birth) QTL (826), Loin muscle area QTL (21352), Musculus gluteus weight QTL (1276), Stearic acid content QTL (3111), Plateletcrit QTL (107303), Marbling QTL (38049), Shoulder subcutaneous fat thickness QTL (5671), Loin muscle area QTL (3221), Platelet count QTL (107311), Muscle moisture percentage QTL (3…
617	1	25546501	25553000	average daily gain QTL (5680), Drip loss QTL (8043), muscle protein percentage QTL (3838), Loin muscle area QTL (46), Loin muscle area QTL (38072), Carcass weight (hot) QTL (16896), backfat above muscle dorsi QTL (5237), average daily gain QTL (338), Conductivity 45 minutes post-mortem QTL (21552), White blood cell counts QTL (15047), Daily feed intake QTL (66267), PH for Longissmus dorsi QTL (27…
618	1	36183001	36186500	Drip loss QTL (7828), average daily gain QTL (5680), Drip loss QTL (8043), Femur length QTL (6498), Estimated carcass lean content QTL (5960), Saturated fatty acid content QTL (31351), muscle protein percentage QTL (3838), CD2-positive leukocyte number QTL (4260), Drip loss QTL (8597), Loin and neck meat weight QTL (807), Body weight (birth) QTL (22970), Loin muscle area QTL (46), Carcass weight …
619	1	44221501	44229500	Drip loss QTL (7828), average daily gain QTL (5680), Drip loss QTL (8043), Estimated carcass lean content QTL (5960), muscle protein percentage QTL (3838), CD2-positive leukocyte number QTL (4260), Drip loss QTL (8597), Loin and neck meat weight QTL (807), Loin muscle area QTL (46), Carcass weight (cold) QTL (792), Backfat at rump QTL (21206), Loin muscle area QTL (38072), Carcass weight (cold) Q…
620	1	46451501	46459500	average daily gain QTL (5680), Drip loss QTL (8043), Estimated carcass lean content QTL (5960), muscle protein percentage QTL (3838), CD2-positive leukocyte number QTL (4260), Loin and neck meat weight QTL (807), Loin muscle area QTL (46), Carcass weight (cold) QTL (792), Backfat at rump QTL (21206), Loin muscle area QTL (38072), Carcass weight (cold) QTL (12710), Carcass weight (hot) QTL (16896)…
621	1	88015001	88024500	average daily gain QTL (5680), Drip loss QTL (8043), Potassium level QTL (6380), Estimated carcass lean content QTL (5960), CD2-positive leukocyte number QTL (4260), backfat at P2 position QTL (4107), average daily gain QTL (3673), Backfat at rump QTL (21206), Loin muscle area QTL (38072), backfat above muscle dorsi QTL (5237), Ear weight QTL (8853), Feed intake QTL (871), White blood cell counts…
622	1	105158001	105161000	average daily gain QTL (5680), Drip loss QTL (8043), Potassium level QTL (6380), CD2-positive leukocyte number QTL (4260), backfat at P2 position QTL (4107), Linoleic acid content QTL (32101), pH for Semimembranosus QTL (5665), CIE-L* QTL (4326), average daily gain QTL (3673), Backfat at rump QTL (21206), Loin muscle area QTL (38072), backfat above muscle dorsi QTL (5237), Ear weight QTL (8853), …
623	1	111259501	111262000	Drip loss QTL (8300), average daily gain QTL (5680), Drip loss QTL (8043), Potassium level QTL (6380), CD2-positive leukocyte number QTL (4260), backfat at P2 position QTL (4107), Linoleic acid content QTL (32101), pH for Semimembranosus QTL (5665), CIE-L* QTL (4326), average daily gain QTL (3673), Backfat at rump QTL (21206), Loin muscle area QTL (38072), backfat above muscle dorsi QTL (5237), E…
624	1	119360001	119365000	Drip loss QTL (8300), average daily gain QTL (5680), Potassium level QTL (6380), CD2-positive leukocyte number QTL (4260), backfat at P2 position QTL (4107), pH for Semimembranosus QTL (5665), CIE-L* QTL (4326), average daily gain QTL (3673), Backfat at rump QTL (21206), Loin muscle area QTL (38072), backfat above muscle dorsi QTL (5237), Ear weight QTL (8853), Backfat weight QTL (3171), Feed int…
625	1	163528001	163535500	Daily feed intake QTL (141), Drip loss QTL (8300), average daily gain QTL (5680), Potassium level QTL (6380), CD2-positive leukocyte number QTL (4260), Side fat thickness QTL (5958), pH for Semimembranosus QTL (5665), Backfat at tenth rib QTL (138), Backfat at rump QTL (21206), Platelet distribution width QTL (12312), Loin muscle area QTL (38072), backfat above muscle dorsi QTL (5237), Backfat we…
626	1	169292501	169296500	Daily feed intake QTL (141), Drip loss QTL (8300), Backfat weight QTL (12724), average daily gain QTL (5680), Potassium level QTL (6380), CD2-positive leukocyte number QTL (4260), Side fat thickness QTL (5958), pH for Semimembranosus QTL (5665), Head weight QTL (432), Backfat at tenth rib QTL (138), Backfat at rump QTL (21206), Platelet distribution width QTL (12312), Loin muscle area QTL (38072)…
627	1	192281501	192292500	Daily feed intake QTL (141), Drip loss QTL (8300), Average backfat thickness QTL (4016), Backfat weight QTL (12724), average daily gain QTL (5680), Potassium level QTL (6380), CD2-positive leukocyte number QTL (4260), Side fat thickness QTL (5958), pH for Semimembranosus QTL (5665), Head weight QTL (432), Backfat at tenth rib QTL (138), Backfat at rump QTL (21206), Platelet distribution width QTL…
628	1	193122001	193125000	Daily feed intake QTL (141), Drip loss QTL (8300), Average backfat thickness QTL (4016), Backfat weight QTL (12724), average daily gain QTL (5680), Potassium level QTL (6380), CD2-positive leukocyte number QTL (4260), Side fat thickness QTL (5958), pH for Semimembranosus QTL (5665), Head weight QTL (432), Backfat at tenth rib QTL (138), Backfat at rump QTL (21206), Platelet distribution width QTL…
629	1	269990501	269995000	Drip loss QTL (8300), External fat on ham QTL (861), average daily gain QTL (5680), average daily gain QTL (2847), Average backfat thickness QTL (310), White blood cell counts QTL (5456), Gestation length QTL (10617), Lean cuts percentage QTL (808), average daily gain QTL (2846), Backfat at rump QTL (21206), Vertebra number QTL (21301), Loin muscle area QTL (38072), backfat above muscle dorsi QTL…
630	1	285879001	285886000	Average backfat thickness QTL (35), Fat to meat ratio QTL (12739), Drip loss QTL (8300), Lean meat percentage QTL (824), Average backfat thickness QTL (3145), average daily gain QTL (5680), Fat-cuts percentage QTL (12727), PH for Longissmus dorsi QTL (3169), Backfat at rump QTL (21206), Vertebra number QTL (21301), Loin muscle area QTL (38072), backfat above muscle dorsi QTL (5237), Thoracic vert…
631	1	293890501	293899000	Average backfat thickness QTL (35), Fat to meat ratio QTL (12739), Drip loss QTL (8300), Lean meat percentage QTL (824), Average backfat thickness QTL (3145), Fat-cuts percentage QTL (12727), PH for Longissmus dorsi QTL (3169), Backfat weight QTL (3149), Ham weight QTL (3148), Drip loss QTL (8131), Drip loss QTL (8323), backfat at last rib QTL (16833), body weight (17 weeks) QTL (662), Drip loss …
632	1	302146001	302153000	Average backfat thickness QTL (35), Drip loss QTL (8300), Average backfat thickness QTL (3145), PH for Longissmus dorsi QTL (3169), Backfat weight QTL (3149), Loin and ham percentage in carcass QTL (377), Ham weight QTL (3148), Drip loss QTL (8131), Drip loss QTL (8323), body weight (17 weeks) QTL (662), Leaf fat weight QTL (402), Drip loss QTL (8382), Drip loss QTL (8564), backfat at last rib QT…
633	1	307798501	307806500	Drip loss QTL (8300), Fat weight (total) QTL (65021), Drip loss QTL (8131), Drip loss QTL (8323), Leaf fat weight QTL (402), Drip loss QTL (8382), Drip loss QTL (8564), Drip loss QTL (8063), Umbilical hernia QTL (8742), Drip loss QTL (8480), Drip loss QTL (7936), Percentage of backfat and leaf fat in carcass QTL (403), Ham weight QTL (376), Loin weight QTL (375), Drip loss QTL (8602)
634	1	308062501	308105000	Drip loss QTL (8300), Fat weight (total) QTL (65021), Drip loss QTL (8131), Drip loss QTL (8323), Leaf fat weight QTL (402), Drip loss QTL (8382), Drip loss QTL (8564), Drip loss QTL (8063), Umbilical hernia QTL (8742), Drip loss QTL (8480), Drip loss QTL (7936), Percentage of backfat and leaf fat in carcass QTL (403), Ham weight QTL (376), Loin weight QTL (375), Drip loss QTL (8602)
635	1	314508001	314514500	Percentage of backfat and leaf fat in carcass QTL (403)
636	1	314700001	314706000	Percentage of backfat and leaf fat in carcass QTL (403)
637	1	61973001	61977000	average daily gain QTL (5680), Drip loss QTL (8043), Estimated carcass lean content QTL (5960), CD2-positive leukocyte number QTL (4260), Backfat at rump QTL (21206), Loin muscle area QTL (38072), backfat above muscle dorsi QTL (5237), Feed intake QTL (871), White blood cell counts QTL (15047), Scapula length QTL (6499), backfat at last rib QTL (5674), Marbling QTL (4019), Head weight QTL (860), …
638	1	163802501	163805500	Daily feed intake QTL (141), Drip loss QTL (8300), Total number born alive QTL (22922), average daily gain QTL (5680), Potassium level QTL (6380), CD2-positive leukocyte number QTL (4260), Side fat thickness QTL (5958), pH for Semimembranosus QTL (5665), Backfat at tenth rib QTL (138), Backfat at rump QTL (21206), Platelet distribution width QTL (12312), Loin muscle area QTL (38072), backfat abov…
639	1	210843001	210846500	Daily feed intake QTL (141), Drip loss QTL (8300), Backfat weight QTL (12724), average daily gain QTL (5680), Potassium level QTL (6380), CD2-positive leukocyte number QTL (4260), Head weight QTL (432), Backfat at tenth rib QTL (138), Backfat at rump QTL (21206), Platelet distribution width QTL (12312), Loin muscle area QTL (38072), backfat above muscle dorsi QTL (5237), Backfat weight QTL (3171)…
640	1	211285501	211289000	Daily feed intake QTL (141), Drip loss QTL (8300), Backfat weight QTL (12724), average daily gain QTL (5680), Potassium level QTL (6380), CD2-positive leukocyte number QTL (4260), Head weight QTL (432), Backfat at tenth rib QTL (138), Backfat at rump QTL (21206), Platelet distribution width QTL (12312), Loin muscle area QTL (38072), backfat above muscle dorsi QTL (5237), Backfat weight QTL (3171)…
641	1	302471001	302476000	Average backfat thickness QTL (35), Drip loss QTL (8300), Average backfat thickness QTL (3145), PH for Longissmus dorsi QTL (3169), Backfat weight QTL (3149), Loin and ham percentage in carcass QTL (377), Ham weight QTL (3148), Drip loss QTL (8131), Drip loss QTL (8323), body weight (17 weeks) QTL (662), Leaf fat weight QTL (402), Drip loss QTL (8382), Drip loss QTL (8564), backfat at last rib QT…
642	1	14651001	14659000	average daily gain QTL (5680), Drip loss QTL (8043), Loin muscle area QTL (38072), Salmonella count in liver QTL (11554), Body weight (birth) QTL (826), Loin muscle area QTL (21352), Stearic acid content QTL (3111), Drip loss QTL (8349), Marbling QTL (38049), Drip loss QTL (8012), Shoulder subcutaneous fat thickness QTL (5671), Loin muscle area QTL (3221), Muscle moisture percentage QTL (38073), …
643	1	15869501	15874000	average daily gain QTL (5680), Drip loss QTL (8043), Loin muscle area QTL (38072), Salmonella count in liver QTL (11554), Body weight (birth) QTL (826), Loin muscle area QTL (21352), Stearic acid content QTL (3111), Drip loss QTL (8349), Marbling QTL (38049), Leaf fat weight QTL (3863), Drip loss QTL (8012), Shoulder subcutaneous fat thickness QTL (5671), Loin muscle area QTL (3221), Muscle moist…
644	1	36299501	36303500	Drip loss QTL (7828), average daily gain QTL (5680), Drip loss QTL (8043), Estimated carcass lean content QTL (5960), muscle protein percentage QTL (3838), CD2-positive leukocyte number QTL (4260), Drip loss QTL (8597), Loin and neck meat weight QTL (807), Loin muscle area QTL (46), Carcass weight (cold) QTL (792), Loin muscle area QTL (38072), Carcass weight (cold) QTL (12710), Carcass weight (h…
645	1	44260501	44265500	Drip loss QTL (7828), average daily gain QTL (5680), Drip loss QTL (8043), Estimated carcass lean content QTL (5960), muscle protein percentage QTL (3838), CD2-positive leukocyte number QTL (4260), Drip loss QTL (8597), Loin and neck meat weight QTL (807), Loin muscle area QTL (46), Carcass weight (cold) QTL (792), Backfat at rump QTL (21206), Loin muscle area QTL (38072), Carcass weight (cold) Q…
646	1	44365501	44369000	Drip loss QTL (7828), average daily gain QTL (5680), Drip loss QTL (8043), Estimated carcass lean content QTL (5960), muscle protein percentage QTL (3838), CD2-positive leukocyte number QTL (4260), Drip loss QTL (8597), Loin and neck meat weight QTL (807), Loin muscle area QTL (46), Carcass weight (cold) QTL (792), Backfat at rump QTL (21206), Loin muscle area QTL (38072), Carcass weight (cold) Q…
647	1	46377501	46384000	average daily gain QTL (5680), Drip loss QTL (8043), Estimated carcass lean content QTL (5960), muscle protein percentage QTL (3838), CD2-positive leukocyte number QTL (4260), Loin and neck meat weight QTL (807), Loin muscle area QTL (46), Carcass weight (cold) QTL (792), Backfat at rump QTL (21206), Loin muscle area QTL (38072), Carcass weight (cold) QTL (12710), Carcass weight (hot) QTL (16896)…
648	1	46673001	46693500	average daily gain QTL (5680), Drip loss QTL (8043), Estimated carcass lean content QTL (5960), muscle protein percentage QTL (3838), CD2-positive leukocyte number QTL (4260), Loin and neck meat weight QTL (807), Loin muscle area QTL (46), Carcass weight (cold) QTL (792), Backfat at rump QTL (21206), Loin muscle area QTL (38072), Carcass weight (cold) QTL (12710), Carcass weight (hot) QTL (16896)…
649	1	47195501	47202000	average daily gain QTL (5680), Drip loss QTL (8043), Estimated carcass lean content QTL (5960), muscle protein percentage QTL (3838), CD2-positive leukocyte number QTL (4260), Loin and neck meat weight QTL (807), Loin muscle area QTL (46), Carcass weight (cold) QTL (792), Backfat at rump QTL (21206), Loin muscle area QTL (38072), Carcass weight (cold) QTL (12710), Carcass weight (hot) QTL (16896)…
650	1	47235501	47249500	average daily gain QTL (5680), Drip loss QTL (8043), Estimated carcass lean content QTL (5960), muscle protein percentage QTL (3838), CD2-positive leukocyte number QTL (4260), Loin and neck meat weight QTL (807), Loin muscle area QTL (46), Carcass weight (cold) QTL (792), Backfat at rump QTL (21206), Loin muscle area QTL (38072), Carcass weight (cold) QTL (12710), Carcass weight (hot) QTL (16896)…
651	1	149286001	149291000	Drip loss QTL (8300), average daily gain QTL (5680), Potassium level QTL (6380), CD2-positive leukocyte number QTL (4260), pH for Semimembranosus QTL (5665), Backfat at rump QTL (21206), Platelet distribution width QTL (12312), Loin muscle area QTL (38072), backfat above muscle dorsi QTL (5237), Ear weight QTL (8853), Backfat weight QTL (3171), Feed intake QTL (871), White blood cell counts QTL (…
652	1	159484001	159487000	Drip loss QTL (8300), average daily gain QTL (5680), Potassium level QTL (6380), CD2-positive leukocyte number QTL (4260), Side fat thickness QTL (5958), pH for Semimembranosus QTL (5665), Backfat at rump QTL (21206), Platelet distribution width QTL (12312), Loin muscle area QTL (38072), backfat above muscle dorsi QTL (5237), Ear weight QTL (8853), Backfat weight QTL (3171), Feed intake QTL (871)…
653	1	210845501	210851000	Daily feed intake QTL (141), Drip loss QTL (8300), Backfat weight QTL (12724), average daily gain QTL (5680), Potassium level QTL (6380), CD2-positive leukocyte number QTL (4260), Head weight QTL (432), Backfat at tenth rib QTL (138), Backfat at rump QTL (21206), Platelet distribution width QTL (12312), Loin muscle area QTL (38072), backfat above muscle dorsi QTL (5237), Backfat weight QTL (3171)…
654	1	259652001	259656500	Drip loss QTL (8300), average daily gain QTL (5680), average daily gain QTL (2847), Gestation length QTL (10617), average daily gain QTL (2846), Backfat at rump QTL (21206), Loin muscle area QTL (38072), average daily gain QTL (16887), backfat above muscle dorsi QTL (5237), Fat-cuts percentage QTL (855), White blood cell counts QTL (15047), Drip loss QTL (8131), average daily gain QTL (22269), ba…
655	1	293881501	293904000	Average backfat thickness QTL (35), Fat to meat ratio QTL (12739), Drip loss QTL (8300), Lean meat percentage QTL (824), Average backfat thickness QTL (3145), Fat-cuts percentage QTL (12727), PH for Longissmus dorsi QTL (3169), Backfat weight QTL (3149), Ham weight QTL (3148), Drip loss QTL (8131), Drip loss QTL (8323), backfat at last rib QTL (16833), body weight (17 weeks) QTL (662), Drip loss …
656	1	314148001	314157000	Percentage of backfat and leaf fat in carcass QTL (403)
657	1	314515001	314521000	Percentage of backfat and leaf fat in carcass QTL (403)
658	1	25015501	25019000	average daily gain QTL (5680), Drip loss QTL (8043), muscle protein percentage QTL (3838), Loin muscle area QTL (46), Loin muscle area QTL (38072), Carcass weight (hot) QTL (16896), backfat above muscle dorsi QTL (5237), average daily gain QTL (338), White blood cell counts QTL (15047), Daily feed intake QTL (66267), PH for Longissmus dorsi QTL (2787), backfat at last rib QTL (5674), CIE-a* QTL (…
659	1	30908501	30914000	average daily gain QTL (5680), Drip loss QTL (8043), muscle protein percentage QTL (3838), Loin muscle area QTL (46), Loin muscle area QTL (38072), Carcass weight (hot) QTL (16896), backfat above muscle dorsi QTL (5237), average daily gain QTL (338), White blood cell counts QTL (15047), PH for Longissmus dorsi QTL (2787), backfat at last rib QTL (5674), CIE-a* QTL (3980), Drip loss QTL (8349), Es…
660	1	140130501	140149500	Drip loss QTL (8300), average daily gain QTL (5680), Potassium level QTL (6380), CD2-positive leukocyte number QTL (4260), pH for Semimembranosus QTL (5665), CIE-L* QTL (4326), Backfat at rump QTL (21206), Platelet distribution width QTL (12312), Loin muscle area QTL (38072), backfat above muscle dorsi QTL (5237), Ear weight QTL (8853), Backfat weight QTL (3171), Feed intake QTL (871), White bloo…
661	1	140145001	140155500	Drip loss QTL (8300), average daily gain QTL (5680), Potassium level QTL (6380), CD2-positive leukocyte number QTL (4260), pH for Semimembranosus QTL (5665), CIE-L* QTL (4326), Backfat at rump QTL (21206), Platelet distribution width QTL (12312), Loin muscle area QTL (38072), backfat above muscle dorsi QTL (5237), Ear weight QTL (8853), Backfat weight QTL (3171), Feed intake QTL (871), White bloo…
662	1	180618001	180620500	Daily feed intake QTL (141), Drip loss QTL (8300), Average backfat thickness QTL (4016), Backfat weight QTL (12724), average daily gain QTL (5680), Potassium level QTL (6380), Backfat at last lumbar QTL (4015), CD2-positive leukocyte number QTL (4260), Side fat thickness QTL (5958), pH for Semimembranosus QTL (5665), Head weight QTL (432), Backfat at tenth rib QTL (138), Backfat at rump QTL (2120…
663	1	285184501	285190000	Average backfat thickness QTL (35), Fat to meat ratio QTL (12739), Drip loss QTL (8300), Lean meat percentage QTL (824), Average backfat thickness QTL (3145), average daily gain QTL (5680), Fat-cuts percentage QTL (12727), PH for Longissmus dorsi QTL (3169), Backfat at rump QTL (21206), Vertebra number QTL (21301), Loin muscle area QTL (38072), backfat above muscle dorsi QTL (5237), Thoracic vert…
664	1	293903001	293913500	Average backfat thickness QTL (35), Fat to meat ratio QTL (12739), Drip loss QTL (8300), Lean meat percentage QTL (824), Average backfat thickness QTL (3145), Fat-cuts percentage QTL (12727), PH for Longissmus dorsi QTL (3169), Backfat weight QTL (3149), Ham weight QTL (3148), Drip loss QTL (8131), Drip loss QTL (8323), backfat at last rib QTL (16833), body weight (17 weeks) QTL (662), Drip loss …
665	1	22929501	22934000	average daily gain QTL (5680), Drip loss QTL (8043), muscle protein percentage QTL (3838), Loin muscle area QTL (38072), backfat above muscle dorsi QTL (5237), average daily gain QTL (338), White blood cell counts QTL (15047), PH for Longissmus dorsi QTL (2787), backfat at last rib QTL (5674), CIE-a* QTL (3980), Drip loss QTL (8349), Estimated carcass lean content QTL (5678), Marbling QTL (38049)…
666	1	68523501	68537500	Liver weight QTL (13265), average daily gain QTL (5680), Drip loss QTL (8043), Potassium level QTL (6380), Estimated carcass lean content QTL (5960), CD2-positive leukocyte number QTL (4260), backfat at P2 position QTL (4107), average daily gain QTL (3673), Backfat at rump QTL (21206), Loin muscle area QTL (38072), backfat above muscle dorsi QTL (5237), Feed intake QTL (871), White blood cell cou…
667	1	68778001	68785500	Liver weight QTL (13265), average daily gain QTL (5680), Drip loss QTL (8043), Potassium level QTL (6380), Estimated carcass lean content QTL (5960), CD2-positive leukocyte number QTL (4260), backfat at P2 position QTL (4107), average daily gain QTL (3673), Backfat at rump QTL (21206), Loin muscle area QTL (38072), backfat above muscle dorsi QTL (5237), Feed intake QTL (871), White blood cell cou…
668	1	100654001	100662000	Drip loss QTL (7766), average daily gain QTL (5680), Drip loss QTL (8043), Potassium level QTL (6380), Estimated carcass lean content QTL (5960), CD2-positive leukocyte number QTL (4260), backfat at P2 position QTL (4107), Drip loss QTL (8450), CIE-L* QTL (4326), average daily gain QTL (3673), Backfat at rump QTL (21206), Loin muscle area QTL (38072), backfat above muscle dorsi QTL (5237), Ear we…
669	1	138621501	138626500	Drip loss QTL (8300), average daily gain QTL (5680), Potassium level QTL (6380), CD2-positive leukocyte number QTL (4260), pH for Semimembranosus QTL (5665), CIE-L* QTL (4326), Backfat at rump QTL (21206), Platelet distribution width QTL (12312), Loin muscle area QTL (38072), backfat above muscle dorsi QTL (5237), Ear weight QTL (8853), Backfat weight QTL (3171), Feed intake QTL (871), White bloo…
670	1	195622501	195628000	Daily feed intake QTL (141), Drip loss QTL (8300), Average backfat thickness QTL (4016), Backfat weight QTL (12724), average daily gain QTL (5680), Potassium level QTL (6380), CD2-positive leukocyte number QTL (4260), Side fat thickness QTL (5958), pH for Semimembranosus QTL (5665), Head weight QTL (432), Backfat at tenth rib QTL (138), Backfat at rump QTL (21206), Platelet distribution width QTL…
671	1	196462501	196467000	Daily feed intake QTL (141), Drip loss QTL (8300), Average backfat thickness QTL (4016), Backfat weight QTL (12724), average daily gain QTL (5680), Potassium level QTL (6380), CD2-positive leukocyte number QTL (4260), Side fat thickness QTL (5958), pH for Semimembranosus QTL (5665), Head weight QTL (432), Backfat at tenth rib QTL (138), Backfat at rump QTL (21206), Platelet distribution width QTL…
672	1	223874501	223879500	Daily feed intake QTL (141), Drip loss QTL (8300), Ratio of glycolytic muscles weight to ham meat and bone weight QTL (1277), Backfat weight QTL (12724), average daily gain QTL (5680), average daily gain QTL (2847), Potassium level QTL (6380), CD2-positive leukocyte number QTL (4260), Drip loss QTL (7809), average daily gain QTL (2846), Head weight QTL (432), Backfat at tenth rib QTL (138), Backf…
673	1	272611001	272615500	Average backfat thickness QTL (35), Drip loss QTL (8300), Average backfat thickness QTL (3145), External fat on ham QTL (861), average daily gain QTL (5680), Average backfat thickness QTL (310), White blood cell counts QTL (5456), PH for Longissmus dorsi QTL (3169), Gestation length QTL (10617), Lean cuts percentage QTL (808), Backfat at rump QTL (21206), Vertebra number QTL (21301), Loin muscle …
674	1	295151001	295153500	Average backfat thickness QTL (35), Drip loss QTL (8300), Average backfat thickness QTL (3145), PH for Longissmus dorsi QTL (3169), Backfat weight QTL (3149), Ham weight QTL (3148), Drip loss QTL (8131), Drip loss QTL (8323), body weight (17 weeks) QTL (662), Leaf fat weight QTL (402), Drip loss QTL (8382), Drip loss QTL (8564), backfat at last rib QTL (27), Drip loss QTL (80), Lean meat percenta…
675	1	307780001	307790000	Drip loss QTL (8300), Fat weight (total) QTL (65021), Average backfat thickness QTL (735), Loin muscle area QTL (759), Drip loss QTL (8131), Drip loss QTL (8323), Body weight (birth) QTL (719), Leaf fat weight QTL (402), Drip loss QTL (8382), Drip loss QTL (8564), Lean meat percentage QTL (750), Drip loss QTL (8063), Umbilical hernia QTL (8742), Drip loss QTL (8480), bone weight QTL (772), Drip l…
676	1	308437501	308445000	Drip loss QTL (8300), Drip loss QTL (8131), Drip loss QTL (8323), Leaf fat weight QTL (402), Drip loss QTL (8382), Drip loss QTL (8564), Drip loss QTL (8063), Umbilical hernia QTL (8742), Drip loss QTL (8480), Drip loss QTL (7936), Percentage of backfat and leaf fat in carcass QTL (403), Ham weight QTL (376), Loin weight QTL (375), Drip loss QTL (8602)
677	1	310273501	310279000	Leaf fat weight QTL (402), Umbilical hernia QTL (8742), Percentage of backfat and leaf fat in carcass QTL (403), Ham weight QTL (376), Loin weight QTL (375)
678	1	294001	324500
679	1	1765501	1779000
680	1	1777001	1788500
681	1	2218001	2224500
682	1	2848001	2853500	Loin muscle area QTL (38072), Body weight (birth) QTL (826), Loin muscle area QTL (21352), Marbling QTL (38049), Loin muscle area QTL (3221), Muscle moisture percentage QTL (38073), Glucose level QTL (15087), Diameter of angular fibers QTL (2793), Teat number QTL (276), Loin fat percentage QTL (38050)
683	1	8982501	8987500	average daily gain QTL (5680), Loin muscle area QTL (38072), CIE-a* QTL (28043), Body weight (birth) QTL (826), Loin muscle area QTL (21352), Musculus gluteus weight QTL (1276), Stearic acid content QTL (3111), Marbling QTL (38049), Shoulder subcutaneous fat thickness QTL (5671), Loin muscle area QTL (3221), Muscle moisture percentage QTL (38073), Stearic acid content QTL (3119), Glucose level QT…
684	1	129504501	129509500	Drip loss QTL (8300), average daily gain QTL (5680), Potassium level QTL (6380), CD2-positive leukocyte number QTL (4260), backfat at P2 position QTL (4107), pH for Semimembranosus QTL (5665), CIE-L* QTL (4326), average daily gain QTL (3673), Backfat at rump QTL (21206), Loin muscle area QTL (38072), backfat above muscle dorsi QTL (5237), Ear weight QTL (8853), Backfat weight QTL (3171), Feed int…
685	1	140039501	140046500	Drip loss QTL (8300), average daily gain QTL (5680), Potassium level QTL (6380), CD2-positive leukocyte number QTL (4260), pH for Semimembranosus QTL (5665), CIE-L* QTL (4326), Backfat at rump QTL (21206), Platelet distribution width QTL (12312), Loin muscle area QTL (38072), backfat above muscle dorsi QTL (5237), Ear weight QTL (8853), Backfat weight QTL (3171), Feed intake QTL (871), White bloo…
686	1	193216501	193223500	Daily feed intake QTL (141), Drip loss QTL (8300), Average backfat thickness QTL (4016), Backfat weight QTL (12724), average daily gain QTL (5680), Potassium level QTL (6380), CD2-positive leukocyte number QTL (4260), Side fat thickness QTL (5958), pH for Semimembranosus QTL (5665), Head weight QTL (432), Backfat at tenth rib QTL (138), Backfat at rump QTL (21206), Platelet distribution width QTL…
687	1	261061501	261065500	Drip loss QTL (8300), average daily gain QTL (5680), average daily gain QTL (2847), Gestation length QTL (10617), average daily gain QTL (2846), Backfat at rump QTL (21206), Loin muscle area QTL (38072), average daily gain QTL (16887), backfat above muscle dorsi QTL (5237), Fat-cuts percentage QTL (855), White blood cell counts QTL (15047), Drip loss QTL (8131), average daily gain QTL (22269), ba…
688	1	272471001	272478000	Average backfat thickness QTL (35), Drip loss QTL (8300), Average backfat thickness QTL (3145), External fat on ham QTL (861), average daily gain QTL (5680), Average backfat thickness QTL (310), White blood cell counts QTL (5456), PH for Longissmus dorsi QTL (3169), Gestation length QTL (10617), Lean cuts percentage QTL (808), Backfat at rump QTL (21206), Vertebra number QTL (21301), Loin muscle …
689	1	314463501	314468500	Percentage of backfat and leaf fat in carcass QTL (403)
690	1	294117501	294123000	Average backfat thickness QTL (35), Fat to meat ratio QTL (12739), Drip loss QTL (8300), Lean meat percentage QTL (824), Average backfat thickness QTL (3145), Fat-cuts percentage QTL (12727), PH for Longissmus dorsi QTL (3169), Backfat weight QTL (3149), Ham weight QTL (3148), Drip loss QTL (8131), Drip loss QTL (8323), backfat at last rib QTL (16833), body weight (17 weeks) QTL (662), Drip loss …
691	1	314451001	314463000	Percentage of backfat and leaf fat in carcass QTL (403)
692	1	198270001	198274500	Daily feed intake QTL (141), Drip loss QTL (8300), Average backfat thickness QTL (4016), Backfat weight QTL (12724), average daily gain QTL (5680), Potassium level QTL (6380), CD2-positive leukocyte number QTL (4260), Side fat thickness QTL (5958), pH for Semimembranosus QTL (5665), Head weight QTL (432), Backfat at tenth rib QTL (138), Backfat at rump QTL (21206), Platelet distribution width QTL…
693	1	285411001	285418000	Average backfat thickness QTL (35), Fat to meat ratio QTL (12739), Drip loss QTL (8300), Lean meat percentage QTL (824), Average backfat thickness QTL (3145), average daily gain QTL (5680), Fat-cuts percentage QTL (12727), PH for Longissmus dorsi QTL (3169), Backfat at rump QTL (21206), Vertebra number QTL (21301), Loin muscle area QTL (38072), backfat above muscle dorsi QTL (5237), Thoracic vert…
694	1	294046001	294057500	Average backfat thickness QTL (35), Fat to meat ratio QTL (12739), Drip loss QTL (8300), Lean meat percentage QTL (824), Average backfat thickness QTL (3145), Fat-cuts percentage QTL (12727), PH for Longissmus dorsi QTL (3169), Backfat weight QTL (3149), Ham weight QTL (3148), Drip loss QTL (8131), Drip loss QTL (8323), backfat at last rib QTL (16833), body weight (17 weeks) QTL (662), Drip loss …
695	1	295184001	295203000	Average backfat thickness QTL (35), Drip loss QTL (8300), Average backfat thickness QTL (3145), PH for Longissmus dorsi QTL (3169), Backfat weight QTL (3149), Ham weight QTL (3148), Drip loss QTL (8131), Drip loss QTL (8323), body weight (17 weeks) QTL (662), Leaf fat weight QTL (402), Drip loss QTL (8382), Drip loss QTL (8564), backfat at last rib QTL (27), Drip loss QTL (80), Lean meat percenta…
696	1	295463001	295467500	Average backfat thickness QTL (35), Drip loss QTL (8300), Average backfat thickness QTL (3145), PH for Longissmus dorsi QTL (3169), Backfat weight QTL (3149), Ham weight QTL (3148), Drip loss QTL (8131), Drip loss QTL (8323), body weight (17 weeks) QTL (662), Leaf fat weight QTL (402), Drip loss QTL (8382), Drip loss QTL (8564), backfat at last rib QTL (27), Drip loss QTL (80), Lean meat percenta…
697	1	295467001	295474500	Average backfat thickness QTL (35), Drip loss QTL (8300), Average backfat thickness QTL (3145), PH for Longissmus dorsi QTL (3169), Backfat weight QTL (3149), Ham weight QTL (3148), Drip loss QTL (8131), Drip loss QTL (8323), body weight (17 weeks) QTL (662), Leaf fat weight QTL (402), Drip loss QTL (8382), Drip loss QTL (8564), backfat at last rib QTL (27), Drip loss QTL (80), Lean meat percenta…
698	1	296442501	296446000	Average backfat thickness QTL (35), Drip loss QTL (8300), Average backfat thickness QTL (3145), PH for Longissmus dorsi QTL (3169), Backfat weight QTL (3149), Ham weight QTL (3148), Drip loss QTL (8131), Drip loss QTL (8323), body weight (17 weeks) QTL (662), Leaf fat weight QTL (402), Drip loss QTL (8382), Drip loss QTL (8564), backfat at last rib QTL (27), Drip loss QTL (80), Lean meat percenta…
699	1	1360501	1366500
700	1	2296501	2300500
701	1	8943001	8949000	average daily gain QTL (5680), Loin muscle area QTL (38072), CIE-a* QTL (28043), Body weight (birth) QTL (826), Loin muscle area QTL (21352), Musculus gluteus weight QTL (1276), Stearic acid content QTL (3111), Marbling QTL (38049), Shoulder subcutaneous fat thickness QTL (5671), Loin muscle area QTL (3221), Muscle moisture percentage QTL (38073), Stearic acid content QTL (3119), Glucose level QT…
702	1	30878001	30883000	average daily gain QTL (5680), Drip loss QTL (8043), muscle protein percentage QTL (3838), Loin muscle area QTL (46), Loin muscle area QTL (38072), Carcass weight (hot) QTL (16896), backfat above muscle dorsi QTL (5237), average daily gain QTL (338), White blood cell counts QTL (15047), PH for Longissmus dorsi QTL (2787), backfat at last rib QTL (5674), CIE-a* QTL (3980), Drip loss QTL (8349), Es…
703	1	44270001	44277500	Drip loss QTL (7828), average daily gain QTL (5680), Drip loss QTL (8043), Estimated carcass lean content QTL (5960), muscle protein percentage QTL (3838), CD2-positive leukocyte number QTL (4260), Drip loss QTL (8597), Loin and neck meat weight QTL (807), Loin muscle area QTL (46), Carcass weight (cold) QTL (792), Backfat at rump QTL (21206), Loin muscle area QTL (38072), Carcass weight (cold) Q…
704	1	48399501	48407500	average daily gain QTL (5680), Drip loss QTL (8043), Estimated carcass lean content QTL (5960), muscle protein percentage QTL (3838), CD2-positive leukocyte number QTL (4260), Loin and neck meat weight QTL (807), Loin muscle area QTL (46), Carcass weight (cold) QTL (792), Backfat at rump QTL (21206), Loin muscle area QTL (38072), Carcass weight (cold) QTL (12710), Carcass weight (hot) QTL (16896)…
705	1	48480001	48485500	average daily gain QTL (5680), Drip loss QTL (8043), Estimated carcass lean content QTL (5960), muscle protein percentage QTL (3838), CD2-positive leukocyte number QTL (4260), Loin and neck meat weight QTL (807), Loin muscle area QTL (46), Carcass weight (cold) QTL (792), Backfat at rump QTL (21206), Loin muscle area QTL (38072), Carcass weight (cold) QTL (12710), Carcass weight (hot) QTL (16896)…
706	1	54388001	54396000	average daily gain QTL (5680), Drip loss QTL (8043), Estimated carcass lean content QTL (5960), CD2-positive leukocyte number QTL (4260), Backfat at rump QTL (21206), Loin muscle area QTL (38072), backfat above muscle dorsi QTL (5237), Feed intake QTL (871), White blood cell counts QTL (15047), backfat at last rib QTL (5674), Marbling QTL (4019), Head weight QTL (860), Drip loss QTL (8349), Estim…
707	1	61715501	61718500	average daily gain QTL (5680), Drip loss QTL (8043), Estimated carcass lean content QTL (5960), CD2-positive leukocyte number QTL (4260), Backfat at rump QTL (21206), Loin muscle area QTL (38072), backfat above muscle dorsi QTL (5237), Feed intake QTL (871), White blood cell counts QTL (15047), Scapula length QTL (6499), backfat at last rib QTL (5674), Marbling QTL (4019), Head weight QTL (860), …
708	1	68820001	68829000	Liver weight QTL (13265), average daily gain QTL (5680), Drip loss QTL (8043), Potassium level QTL (6380), Estimated carcass lean content QTL (5960), CD2-positive leukocyte number QTL (4260), backfat at P2 position QTL (4107), average daily gain QTL (3673), Backfat at rump QTL (21206), Loin muscle area QTL (38072), backfat above muscle dorsi QTL (5237), Feed intake QTL (871), White blood cell cou…
709	1	105046501	105051000	average daily gain QTL (5680), Drip loss QTL (8043), Potassium level QTL (6380), Estimated carcass lean content QTL (5960), CD2-positive leukocyte number QTL (4260), backfat at P2 position QTL (4107), Linoleic acid content QTL (32101), CIE-L* QTL (4326), average daily gain QTL (3673), Backfat at rump QTL (21206), Loin muscle area QTL (38072), backfat above muscle dorsi QTL (5237), Ear weight QTL …
710	1	105738501	105743500	average daily gain QTL (5680), Drip loss QTL (8043), Potassium level QTL (6380), CD2-positive leukocyte number QTL (4260), backfat at P2 position QTL (4107), Linoleic acid content QTL (32101), pH for Semimembranosus QTL (5665), CIE-L* QTL (4326), average daily gain QTL (3673), Backfat at rump QTL (21206), Loin muscle area QTL (38072), backfat above muscle dorsi QTL (5237), Ear weight QTL (8853), …
711	1	129580501	129590000	Drip loss QTL (8300), average daily gain QTL (5680), Potassium level QTL (6380), CD2-positive leukocyte number QTL (4260), backfat at P2 position QTL (4107), pH for Semimembranosus QTL (5665), CIE-L* QTL (4326), average daily gain QTL (3673), Backfat at rump QTL (21206), Loin muscle area QTL (38072), backfat above muscle dorsi QTL (5237), Ear weight QTL (8853), Backfat weight QTL (3171), Feed int…
712	1	139845501	139849500	Drip loss QTL (8300), average daily gain QTL (5680), Potassium level QTL (6380), CD2-positive leukocyte number QTL (4260), pH for Semimembranosus QTL (5665), CIE-L* QTL (4326), Backfat at rump QTL (21206), Platelet distribution width QTL (12312), Loin muscle area QTL (38072), backfat above muscle dorsi QTL (5237), Ear weight QTL (8853), Backfat weight QTL (3171), Feed intake QTL (871), White bloo…
713	1	149415001	149423000	Drip loss QTL (8300), average daily gain QTL (5680), Potassium level QTL (6380), CD2-positive leukocyte number QTL (4260), pH for Semimembranosus QTL (5665), Backfat at rump QTL (21206), Platelet distribution width QTL (12312), Loin muscle area QTL (38072), backfat above muscle dorsi QTL (5237), Ear weight QTL (8853), Backfat weight QTL (3171), Feed intake QTL (871), White blood cell counts QTL (…
714	1	165798001	165803500	Daily feed intake QTL (141), Drip loss QTL (8300), average daily gain QTL (5680), Potassium level QTL (6380), CD2-positive leukocyte number QTL (4260), Side fat thickness QTL (5958), pH for Semimembranosus QTL (5665), Head weight QTL (432), Backfat at tenth rib QTL (138), Backfat at rump QTL (21206), Platelet distribution width QTL (12312), Loin muscle area QTL (38072), backfat above muscle dorsi…
715	1	172039501	172043000	Daily feed intake QTL (141), Drip loss QTL (8300), Backfat weight QTL (12724), average daily gain QTL (5680), Potassium level QTL (6380), CD2-positive leukocyte number QTL (4260), Side fat thickness QTL (5958), pH for Semimembranosus QTL (5665), Head weight QTL (432), Backfat at tenth rib QTL (138), Backfat at rump QTL (21206), average daily gain QTL (22259), Platelet distribution width QTL (1231…
716	1	172807501	172810000	Daily feed intake QTL (141), Drip loss QTL (8300), Backfat weight QTL (12724), average daily gain QTL (5680), Potassium level QTL (6380), CD2-positive leukocyte number QTL (4260), Side fat thickness QTL (5958), pH for Semimembranosus QTL (5665), Head weight QTL (432), Backfat at tenth rib QTL (138), Backfat at rump QTL (21206), average daily gain QTL (22259), Platelet distribution width QTL (1231…
717	1	178397001	178400500	Daily feed intake QTL (141), Drip loss QTL (8300), Average backfat thickness QTL (4016), Backfat weight QTL (12724), average daily gain QTL (5680), Potassium level QTL (6380), Backfat at last lumbar QTL (4015), CD2-positive leukocyte number QTL (4260), Side fat thickness QTL (5958), pH for Semimembranosus QTL (5665), Head weight QTL (432), Backfat at tenth rib QTL (138), Backfat at rump QTL (2120…
718	1	239086001	239093500	Drip loss QTL (8300), average daily gain QTL (5680), average daily gain QTL (2847), Hind feet conformation QTL (8912), Gestation length QTL (10617), average daily gain QTL (2846), Backfat at rump QTL (21206), Platelet distribution width QTL (12312), Loin muscle area QTL (38072), average daily gain QTL (16887), backfat above muscle dorsi QTL (5237), Fat-cuts percentage QTL (855), Locomotion QTL (4…
719	1	297883001	297889000	Average backfat thickness QTL (35), Drip loss QTL (8300), Average backfat thickness QTL (3145), PH for Longissmus dorsi QTL (3169), Backfat weight QTL (3149), Ham weight QTL (3148), Drip loss QTL (8131), Drip loss QTL (8323), body weight (17 weeks) QTL (662), Leaf fat weight QTL (402), Drip loss QTL (8382), Drip loss QTL (8564), backfat at last rib QTL (27), Drip loss QTL (80), Lean meat percenta…
720	1	305628501	305634500	Average backfat thickness QTL (35), Drip loss QTL (8300), Average backfat thickness QTL (3145), PH for Longissmus dorsi QTL (3169), Backfat weight QTL (3149), Loin and ham percentage in carcass QTL (377), Ham weight QTL (3148), Drip loss QTL (8131), Drip loss QTL (8323), body weight (17 weeks) QTL (662), Leaf fat weight QTL (402), Fat percentage in carcass QTL (65019), Drip loss QTL (8382), Drip …
721	1	307789001	307801000	Drip loss QTL (8300), Fat weight (total) QTL (65021), Drip loss QTL (8131), Drip loss QTL (8323), Leaf fat weight QTL (402), Drip loss QTL (8382), Drip loss QTL (8564), Drip loss QTL (8063), Umbilical hernia QTL (8742), Drip loss QTL (8480), Drip loss QTL (7936), Percentage of backfat and leaf fat in carcass QTL (403), Ham weight QTL (376), Loin weight QTL (375), Drip loss QTL (8602)
722	1	308442001	308451000	Drip loss QTL (8300), Drip loss QTL (8131), Drip loss QTL (8323), Leaf fat weight QTL (402), Drip loss QTL (8382), Drip loss QTL (8564), Drip loss QTL (8063), Umbilical hernia QTL (8742), Drip loss QTL (8480), Drip loss QTL (7936), Percentage of backfat and leaf fat in carcass QTL (403), Ham weight QTL (376), Loin weight QTL (375), Drip loss QTL (8602)
723	1	308724501	308735500	Drip loss QTL (8300), Drip loss QTL (8131), Drip loss QTL (8323), Leaf fat weight QTL (402), Drip loss QTL (8382), Drip loss QTL (8564), Drip loss QTL (8063), Umbilical hernia QTL (8742), Drip loss QTL (8480), Drip loss QTL (7936), Percentage of backfat and leaf fat in carcass QTL (403), Ham weight QTL (376), Loin weight QTL (375), Drip loss QTL (8602)
724	1	314773001	314780500	Percentage of backfat and leaf fat in carcass QTL (403)
725	1	1004501	1013000
726	1	1557001	1582500
727	1	9023001	9032500	average daily gain QTL (5680), Loin muscle area QTL (38072), CIE-a* QTL (28043), Body weight (birth) QTL (826), Loin muscle area QTL (21352), Musculus gluteus weight QTL (1276), Stearic acid content QTL (3111), Plateletcrit QTL (107303), Marbling QTL (38049), Shoulder subcutaneous fat thickness QTL (5671), Loin muscle area QTL (3221), Platelet count QTL (107311), Muscle moisture percentage QTL (3…
728	1	9244501	9248500	average daily gain QTL (5680), Loin muscle area QTL (38072), CIE-a* QTL (28043), Drip loss QTL (8338), Body weight (birth) QTL (826), Drip loss QTL (8598), Loin muscle area QTL (21352), Musculus gluteus weight QTL (1276), Stearic acid content QTL (3111), Plateletcrit QTL (107303), Marbling QTL (38049), Shoulder subcutaneous fat thickness QTL (5671), Loin muscle area QTL (3221), Platelet count QTL…
729	1	11057001	11061500	average daily gain QTL (5680), Loin muscle area QTL (38072), Salmonella count in liver QTL (11554), CIE-a* QTL (28043), Body weight (birth) QTL (826), Loin muscle area QTL (21352), Stearic acid content QTL (3111), Marbling QTL (38049), Shoulder subcutaneous fat thickness QTL (5671), Loin muscle area QTL (3221), Muscle moisture percentage QTL (38073), average daily gain QTL (319), Stearic acid con…
730	1	51511001	51514500	average daily gain QTL (5680), Drip loss QTL (8043), Estimated carcass lean content QTL (5960), muscle protein percentage QTL (3838), CD2-positive leukocyte number QTL (4260), Loin and neck meat weight QTL (807), Loin muscle area QTL (46), Carcass weight (cold) QTL (792), Backfat at rump QTL (21206), Loin muscle area QTL (38072), Carcass weight (cold) QTL (12710), Carcass weight (hot) QTL (16896)…
731	1	66686501	66689500	Drip loss QTL (7737), Drip loss QTL (7956), average daily gain QTL (5680), Drip loss QTL (8043), Potassium level QTL (6380), Estimated carcass lean content QTL (5960), CD2-positive leukocyte number QTL (4260), backfat at P2 position QTL (4107), average daily gain QTL (3673), Backfat at rump QTL (21206), Loin muscle area QTL (38072), backfat above muscle dorsi QTL (5237), Drip loss QTL (8201), Fee…
732	1	259618001	259620500	Drip loss QTL (8300), average daily gain QTL (5680), average daily gain QTL (2847), Gestation length QTL (10617), average daily gain QTL (2846), Backfat at rump QTL (21206), Loin muscle area QTL (38072), average daily gain QTL (16887), backfat above muscle dorsi QTL (5237), Fat-cuts percentage QTL (855), White blood cell counts QTL (15047), Drip loss QTL (8131), average daily gain QTL (22269), ba…
733	1	295222001	295226500	Average backfat thickness QTL (35), Drip loss QTL (8300), Average backfat thickness QTL (3145), PH for Longissmus dorsi QTL (3169), Backfat weight QTL (3149), Ham weight QTL (3148), Drip loss QTL (8131), Drip loss QTL (8323), body weight (17 weeks) QTL (662), Leaf fat weight QTL (402), Drip loss QTL (8382), Drip loss QTL (8564), backfat at last rib QTL (27), Drip loss QTL (80), Lean meat percenta…
734	1	297889001	297897000	Average backfat thickness QTL (35), Drip loss QTL (8300), Average backfat thickness QTL (3145), PH for Longissmus dorsi QTL (3169), Backfat weight QTL (3149), Ham weight QTL (3148), Drip loss QTL (8131), Drip loss QTL (8323), body weight (17 weeks) QTL (662), Leaf fat weight QTL (402), Drip loss QTL (8382), Drip loss QTL (8564), backfat at last rib QTL (27), Drip loss QTL (80), Lean meat percenta…
735	1	308615001	308620000	Drip loss QTL (8300), Drip loss QTL (8131), Drip loss QTL (8323), Leaf fat weight QTL (402), Drip loss QTL (8382), Drip loss QTL (8564), Drip loss QTL (8063), Umbilical hernia QTL (8742), Drip loss QTL (8480), Drip loss QTL (7936), Percentage of backfat and leaf fat in carcass QTL (403), Ham weight QTL (376), Loin weight QTL (375), Drip loss QTL (8602)
736	1	310160501	310166000	Leaf fat weight QTL (402), Umbilical hernia QTL (8742), Percentage of backfat and leaf fat in carcass QTL (403), Ham weight QTL (376), Loin weight QTL (375)
737	1	1193501	1203000
738	1	1395501	1401000
739	1	1524501	1530000
740	1	1660001	1666500
741	1	1986501	1995500
742	1	2666501	2675000
743	1	13966001	13972000	average daily gain QTL (5680), Drip loss QTL (8043), Loin muscle area QTL (38072), Salmonella count in liver QTL (11554), Body weight (birth) QTL (826), Loin muscle area QTL (21352), Stearic acid content QTL (3111), Drip loss QTL (8349), Marbling QTL (38049), Drip loss QTL (8012), Shoulder subcutaneous fat thickness QTL (5671), Loin muscle area QTL (3221), Muscle moisture percentage QTL (38073), …
744	1	18306001	18312000	average daily gain QTL (5680), Drip loss QTL (8043), Loin muscle area QTL (38072), backfat above muscle dorsi QTL (5237), Drip loss QTL (8482), PH for Longissmus dorsi QTL (2787), Body weight QTL (66275), backfat at last rib QTL (5674), Drip loss QTL (8349), Estimated carcass lean content QTL (5678), Marbling QTL (38049), Leaf fat weight QTL (3863), Drip loss QTL (8012), Shoulder subcutaneous fat…
745	1	26668501	26671500	average daily gain QTL (5680), Drip loss QTL (8043), muscle protein percentage QTL (3838), Loin muscle area QTL (46), Loin muscle area QTL (38072), Carcass weight (hot) QTL (16896), backfat above muscle dorsi QTL (5237), average daily gain QTL (338), White blood cell counts QTL (15047), Daily feed intake QTL (66267), PH for Longissmus dorsi QTL (2787), backfat at last rib QTL (5674), CIE-a* QTL (…
746	1	26728501	26732000	average daily gain QTL (5680), Drip loss QTL (8043), muscle protein percentage QTL (3838), Loin muscle area QTL (46), Loin muscle area QTL (38072), Carcass weight (hot) QTL (16896), backfat above muscle dorsi QTL (5237), average daily gain QTL (338), White blood cell counts QTL (15047), Daily feed intake QTL (66267), PH for Longissmus dorsi QTL (2787), backfat at last rib QTL (5674), CIE-a* QTL (…
747	1	26765001	26774500	average daily gain QTL (5680), Drip loss QTL (8043), muscle protein percentage QTL (3838), Loin muscle area QTL (46), Loin muscle area QTL (38072), Carcass weight (hot) QTL (16896), backfat above muscle dorsi QTL (5237), average daily gain QTL (338), White blood cell counts QTL (15047), Daily feed intake QTL (66267), PH for Longissmus dorsi QTL (2787), backfat at last rib QTL (5674), CIE-a* QTL (…
748	1	26777501	26781500	average daily gain QTL (5680), Drip loss QTL (8043), muscle protein percentage QTL (3838), Loin muscle area QTL (46), Loin muscle area QTL (38072), Carcass weight (hot) QTL (16896), backfat above muscle dorsi QTL (5237), average daily gain QTL (338), White blood cell counts QTL (15047), Daily feed intake QTL (66267), PH for Longissmus dorsi QTL (2787), backfat at last rib QTL (5674), CIE-a* QTL (…
749	1	26803001	26812000	average daily gain QTL (5680), Drip loss QTL (8043), muscle protein percentage QTL (3838), Loin muscle area QTL (46), Loin muscle area QTL (38072), Carcass weight (hot) QTL (16896), backfat above muscle dorsi QTL (5237), average daily gain QTL (338), White blood cell counts QTL (15047), Daily feed intake QTL (66267), PH for Longissmus dorsi QTL (2787), backfat at last rib QTL (5674), CIE-a* QTL (…
750	1	26964001	26968500	average daily gain QTL (5680), Drip loss QTL (8043), muscle protein percentage QTL (3838), Loin muscle area QTL (46), Loin muscle area QTL (38072), Carcass weight (hot) QTL (16896), backfat above muscle dorsi QTL (5237), average daily gain QTL (338), White blood cell counts QTL (15047), Daily feed intake QTL (66267), PH for Longissmus dorsi QTL (2787), backfat at last rib QTL (5674), CIE-a* QTL (…
751	1	27083001	27087000	average daily gain QTL (5680), Drip loss QTL (8043), muscle protein percentage QTL (3838), Loin muscle area QTL (46), Loin muscle area QTL (38072), Carcass weight (hot) QTL (16896), backfat above muscle dorsi QTL (5237), average daily gain QTL (338), White blood cell counts QTL (15047), Daily feed intake QTL (66267), Mean platelet volume QTL (107291), PH for Longissmus dorsi QTL (2787), backfat a…
752	1	33737001	33741500	average daily gain QTL (5680), Drip loss QTL (8043), muscle protein percentage QTL (3838), Loin muscle area QTL (46), Loin muscle area QTL (38072), Carcass weight (hot) QTL (16896), backfat above muscle dorsi QTL (5237), average daily gain QTL (338), White blood cell counts QTL (15047), PH for Longissmus dorsi QTL (2787), backfat at last rib QTL (5674), CIE-a* QTL (3980), Drip loss QTL (8349), Es…
753	1	37889001	37899000	Drip loss QTL (7828), average daily gain QTL (5680), Drip loss QTL (8043), Estimated carcass lean content QTL (5960), muscle protein percentage QTL (3838), CD2-positive leukocyte number QTL (4260), Drip loss QTL (8597), Loin and neck meat weight QTL (807), Loin muscle area QTL (46), Carcass weight (cold) QTL (792), Loin muscle area QTL (38072), Carcass weight (cold) QTL (12710), Carcass weight (h…
754	1	41831501	41838000	Drip loss QTL (7828), average daily gain QTL (5680), Drip loss QTL (8043), Estimated carcass lean content QTL (5960), muscle protein percentage QTL (3838), CD2-positive leukocyte number QTL (4260), Drip loss QTL (8597), Loin and neck meat weight QTL (807), Loin muscle area QTL (46), Carcass weight (cold) QTL (792), Loin muscle area QTL (38072), Carcass weight (cold) QTL (12710), Carcass weight (h…
755	1	42700001	42703500	Drip loss QTL (7828), average daily gain QTL (5680), Drip loss QTL (8043), Estimated carcass lean content QTL (5960), muscle protein percentage QTL (3838), CD2-positive leukocyte number QTL (4260), Drip loss QTL (8597), Loin and neck meat weight QTL (807), Loin muscle area QTL (46), Carcass weight (cold) QTL (792), Loin muscle area QTL (38072), Carcass weight (cold) QTL (12710), Carcass weight (h…
756	1	42925501	42930500	Drip loss QTL (7828), average daily gain QTL (5680), Drip loss QTL (8043), Estimated carcass lean content QTL (5960), muscle protein percentage QTL (3838), CD2-positive leukocyte number QTL (4260), Drip loss QTL (8597), Loin and neck meat weight QTL (807), Loin muscle area QTL (46), Carcass weight (cold) QTL (792), Loin muscle area QTL (38072), Carcass weight (cold) QTL (12710), Carcass weight (h…
757	1	44277001	44282000	Drip loss QTL (7828), average daily gain QTL (5680), Drip loss QTL (8043), Estimated carcass lean content QTL (5960), muscle protein percentage QTL (3838), CD2-positive leukocyte number QTL (4260), Drip loss QTL (8597), Loin and neck meat weight QTL (807), Loin muscle area QTL (46), Carcass weight (cold) QTL (792), Backfat at rump QTL (21206), Loin muscle area QTL (38072), Carcass weight (cold) Q…
758	1	46340001	46344000	average daily gain QTL (5680), Drip loss QTL (8043), Estimated carcass lean content QTL (5960), muscle protein percentage QTL (3838), CD2-positive leukocyte number QTL (4260), Loin and neck meat weight QTL (807), Loin muscle area QTL (46), Carcass weight (cold) QTL (792), Backfat at rump QTL (21206), Loin muscle area QTL (38072), Carcass weight (cold) QTL (12710), Carcass weight (hot) QTL (16896)…
759	1	46393001	46400000	average daily gain QTL (5680), Drip loss QTL (8043), Estimated carcass lean content QTL (5960), muscle protein percentage QTL (3838), CD2-positive leukocyte number QTL (4260), Loin and neck meat weight QTL (807), Loin muscle area QTL (46), Carcass weight (cold) QTL (792), Backfat at rump QTL (21206), Loin muscle area QTL (38072), Carcass weight (cold) QTL (12710), Carcass weight (hot) QTL (16896)…
760	1	46687501	46698000	average daily gain QTL (5680), Drip loss QTL (8043), Estimated carcass lean content QTL (5960), muscle protein percentage QTL (3838), CD2-positive leukocyte number QTL (4260), Loin and neck meat weight QTL (807), Loin muscle area QTL (46), Carcass weight (cold) QTL (792), Backfat at rump QTL (21206), Loin muscle area QTL (38072), Carcass weight (cold) QTL (12710), Carcass weight (hot) QTL (16896)…
761	1	46889501	46898000	average daily gain QTL (5680), Drip loss QTL (8043), Estimated carcass lean content QTL (5960), muscle protein percentage QTL (3838), CD2-positive leukocyte number QTL (4260), Loin and neck meat weight QTL (807), Loin muscle area QTL (46), Carcass weight (cold) QTL (792), Backfat at rump QTL (21206), Loin muscle area QTL (38072), Carcass weight (cold) QTL (12710), Carcass weight (hot) QTL (16896)…
762	1	47107001	47111000	average daily gain QTL (5680), Drip loss QTL (8043), Estimated carcass lean content QTL (5960), muscle protein percentage QTL (3838), CD2-positive leukocyte number QTL (4260), Loin and neck meat weight QTL (807), Loin muscle area QTL (46), Carcass weight (cold) QTL (792), Backfat at rump QTL (21206), Loin muscle area QTL (38072), Carcass weight (cold) QTL (12710), Carcass weight (hot) QTL (16896)…
763	1	47249501	47255000	average daily gain QTL (5680), Drip loss QTL (8043), Estimated carcass lean content QTL (5960), muscle protein percentage QTL (3838), CD2-positive leukocyte number QTL (4260), Loin and neck meat weight QTL (807), Loin muscle area QTL (46), Carcass weight (cold) QTL (792), Backfat at rump QTL (21206), Loin muscle area QTL (38072), Carcass weight (cold) QTL (12710), Carcass weight (hot) QTL (16896)…
764	1	47253001	47260500	average daily gain QTL (5680), Drip loss QTL (8043), Estimated carcass lean content QTL (5960), muscle protein percentage QTL (3838), CD2-positive leukocyte number QTL (4260), Loin and neck meat weight QTL (807), Loin muscle area QTL (46), Carcass weight (cold) QTL (792), Backfat at rump QTL (21206), Loin muscle area QTL (38072), Carcass weight (cold) QTL (12710), Carcass weight (hot) QTL (16896)…
765	1	47777501	47783000	average daily gain QTL (5680), Drip loss QTL (8043), Estimated carcass lean content QTL (5960), muscle protein percentage QTL (3838), CD2-positive leukocyte number QTL (4260), Loin and neck meat weight QTL (807), Loin muscle area QTL (46), Carcass weight (cold) QTL (792), Backfat at rump QTL (21206), Loin muscle area QTL (38072), Carcass weight (cold) QTL (12710), Carcass weight (hot) QTL (16896)…
766	1	50750501	50756500	average daily gain QTL (5680), Drip loss QTL (8043), Estimated carcass lean content QTL (5960), muscle protein percentage QTL (3838), CD2-positive leukocyte number QTL (4260), Loin and neck meat weight QTL (807), Loin muscle area QTL (46), Carcass weight (cold) QTL (792), Backfat at rump QTL (21206), Loin muscle area QTL (38072), Carcass weight (cold) QTL (12710), Carcass weight (hot) QTL (16896)…
767	1	50982501	50988500	average daily gain QTL (5680), Drip loss QTL (8043), Estimated carcass lean content QTL (5960), muscle protein percentage QTL (3838), CD2-positive leukocyte number QTL (4260), Loin and neck meat weight QTL (807), Loin muscle area QTL (46), Carcass weight (cold) QTL (792), Backfat at rump QTL (21206), Loin muscle area QTL (38072), Carcass weight (cold) QTL (12710), Carcass weight (hot) QTL (16896)…
768	1	51663501	51667500	average daily gain QTL (5680), Drip loss QTL (8043), Estimated carcass lean content QTL (5960), muscle protein percentage QTL (3838), CD2-positive leukocyte number QTL (4260), Loin and neck meat weight QTL (807), Loin muscle area QTL (46), Carcass weight (cold) QTL (792), Backfat at rump QTL (21206), Loin muscle area QTL (38072), Carcass weight (cold) QTL (12710), Carcass weight (hot) QTL (16896)…
769	1	51718001	51722500	average daily gain QTL (5680), Drip loss QTL (8043), Estimated carcass lean content QTL (5960), muscle protein percentage QTL (3838), CD2-positive leukocyte number QTL (4260), Loin and neck meat weight QTL (807), Loin muscle area QTL (46), Carcass weight (cold) QTL (792), Backfat at rump QTL (21206), Loin muscle area QTL (38072), Carcass weight (cold) QTL (12710), Carcass weight (hot) QTL (16896)…
770	1	51786501	51791000	average daily gain QTL (5680), Drip loss QTL (8043), Estimated carcass lean content QTL (5960), muscle protein percentage QTL (3838), CD2-positive leukocyte number QTL (4260), Loin and neck meat weight QTL (807), Loin muscle area QTL (46), Carcass weight (cold) QTL (792), Backfat at rump QTL (21206), Loin muscle area QTL (38072), Carcass weight (cold) QTL (12710), Carcass weight (hot) QTL (16896)…
771	1	51906501	51916000	average daily gain QTL (5680), Drip loss QTL (8043), Estimated carcass lean content QTL (5960), muscle protein percentage QTL (3838), CD2-positive leukocyte number QTL (4260), Loin and neck meat weight QTL (807), Loin muscle area QTL (46), Carcass weight (cold) QTL (792), Backfat at rump QTL (21206), Loin muscle area QTL (38072), Carcass weight (cold) QTL (12710), Carcass weight (hot) QTL (16896)…
772	1	52737001	52742500	average daily gain QTL (5680), Drip loss QTL (8043), Estimated carcass lean content QTL (5960), muscle protein percentage QTL (3838), CD2-positive leukocyte number QTL (4260), Drip loss QTL (7794), Loin and neck meat weight QTL (807), Loin muscle area QTL (46), Carcass weight (cold) QTL (792), Backfat at rump QTL (21206), Drip loss QTL (8254), Loin muscle area QTL (38072), Carcass weight (cold) Q…
773	1	53493001	53497000	average daily gain QTL (5680), Drip loss QTL (8043), Estimated carcass lean content QTL (5960), CD2-positive leukocyte number QTL (4260), Backfat at rump QTL (21206), Loin muscle area QTL (38072), backfat above muscle dorsi QTL (5237), Feed intake QTL (871), White blood cell counts QTL (15047), backfat at last rib QTL (5674), Marbling QTL (4019), Head weight QTL (860), Drip loss QTL (8349), Estim…
774	1	53533001	53537000	average daily gain QTL (5680), Drip loss QTL (8043), Estimated carcass lean content QTL (5960), CD2-positive leukocyte number QTL (4260), Backfat at rump QTL (21206), Loin muscle area QTL (38072), backfat above muscle dorsi QTL (5237), Feed intake QTL (871), White blood cell counts QTL (15047), backfat at last rib QTL (5674), Marbling QTL (4019), Head weight QTL (860), Drip loss QTL (8349), Estim…
775	1	53853501	53860500	average daily gain QTL (5680), Drip loss QTL (8043), Estimated carcass lean content QTL (5960), CD2-positive leukocyte number QTL (4260), Backfat at rump QTL (21206), Loin muscle area QTL (38072), backfat above muscle dorsi QTL (5237), Feed intake QTL (871), White blood cell counts QTL (15047), backfat at last rib QTL (5674), Marbling QTL (4019), Head weight QTL (860), Drip loss QTL (8349), Estim…
776	1	54393001	54397500	average daily gain QTL (5680), Drip loss QTL (8043), Estimated carcass lean content QTL (5960), CD2-positive leukocyte number QTL (4260), Backfat at rump QTL (21206), Loin muscle area QTL (38072), backfat above muscle dorsi QTL (5237), Feed intake QTL (871), White blood cell counts QTL (15047), backfat at last rib QTL (5674), Marbling QTL (4019), Head weight QTL (860), Drip loss QTL (8349), Estim…
777	1	54503001	54508500	average daily gain QTL (5680), Drip loss QTL (8043), Estimated carcass lean content QTL (5960), CD2-positive leukocyte number QTL (4260), Backfat at rump QTL (21206), Loin muscle area QTL (38072), backfat above muscle dorsi QTL (5237), Feed intake QTL (871), White blood cell counts QTL (15047), backfat at last rib QTL (5674), Marbling QTL (4019), Head weight QTL (860), Drip loss QTL (8349), Estim…
778	1	54511001	54518000	average daily gain QTL (5680), Drip loss QTL (8043), Estimated carcass lean content QTL (5960), CD2-positive leukocyte number QTL (4260), Backfat at rump QTL (21206), Loin muscle area QTL (38072), backfat above muscle dorsi QTL (5237), Feed intake QTL (871), White blood cell counts QTL (15047), backfat at last rib QTL (5674), Marbling QTL (4019), Head weight QTL (860), Drip loss QTL (8349), Estim…
779	1	54525501	54529500	average daily gain QTL (5680), Drip loss QTL (8043), Estimated carcass lean content QTL (5960), CD2-positive leukocyte number QTL (4260), Backfat at rump QTL (21206), Loin muscle area QTL (38072), backfat above muscle dorsi QTL (5237), Feed intake QTL (871), White blood cell counts QTL (15047), backfat at last rib QTL (5674), Marbling QTL (4019), Head weight QTL (860), Drip loss QTL (8349), Estim…
780	1	54636501	54645000	average daily gain QTL (5680), Drip loss QTL (8043), Estimated carcass lean content QTL (5960), CD2-positive leukocyte number QTL (4260), Backfat at rump QTL (21206), Loin muscle area QTL (38072), backfat above muscle dorsi QTL (5237), Feed intake QTL (871), White blood cell counts QTL (15047), backfat at last rib QTL (5674), Marbling QTL (4019), Head weight QTL (860), Drip loss QTL (8349), Estim…
781	1	59956501	59962000	average daily gain QTL (5680), Drip loss QTL (8043), Estimated carcass lean content QTL (5960), CD2-positive leukocyte number QTL (4260), Backfat at rump QTL (21206), Loin muscle area QTL (38072), Melanoma susceptibility QTL (7566), backfat above muscle dorsi QTL (5237), Feed intake QTL (871), White blood cell counts QTL (15047), backfat at last rib QTL (5674), Marbling QTL (4019), Head weight QT…
782	1	61233001	61239000	average daily gain QTL (5680), Drip loss QTL (8043), Estimated carcass lean content QTL (5960), CD2-positive leukocyte number QTL (4260), Backfat at rump QTL (21206), Loin muscle area QTL (38072), backfat above muscle dorsi QTL (5237), Feed intake QTL (871), White blood cell counts QTL (15047), Scapula length QTL (6499), backfat at last rib QTL (5674), Marbling QTL (4019), Head weight QTL (860), …
783	1	61402001	61407000	average daily gain QTL (5680), Drip loss QTL (8043), Estimated carcass lean content QTL (5960), CD2-positive leukocyte number QTL (4260), Backfat at rump QTL (21206), Loin muscle area QTL (38072), backfat above muscle dorsi QTL (5237), Feed intake QTL (871), White blood cell counts QTL (15047), Scapula length QTL (6499), backfat at last rib QTL (5674), Marbling QTL (4019), Head weight QTL (860), …
784	1	62123501	62126500	average daily gain QTL (5680), Drip loss QTL (8043), Estimated carcass lean content QTL (5960), CD2-positive leukocyte number QTL (4260), Backfat at rump QTL (21206), Loin muscle area QTL (38072), backfat above muscle dorsi QTL (5237), Feed intake QTL (871), White blood cell counts QTL (15047), Scapula length QTL (6499), backfat at last rib QTL (5674), Marbling QTL (4019), Head weight QTL (860), …
785	1	67419001	67424500	Drip loss QTL (7737), Drip loss QTL (7956), Liver weight QTL (13265), average daily gain QTL (5680), Drip loss QTL (8043), Potassium level QTL (6380), Estimated carcass lean content QTL (5960), CD2-positive leukocyte number QTL (4260), backfat at P2 position QTL (4107), average daily gain QTL (3673), Backfat at rump QTL (21206), Loin muscle area QTL (38072), backfat above muscle dorsi QTL (5237),…
786	1	67429001	67434500	Drip loss QTL (7737), Drip loss QTL (7956), Liver weight QTL (13265), average daily gain QTL (5680), Drip loss QTL (8043), Potassium level QTL (6380), Estimated carcass lean content QTL (5960), CD2-positive leukocyte number QTL (4260), backfat at P2 position QTL (4107), average daily gain QTL (3673), Backfat at rump QTL (21206), Loin muscle area QTL (38072), backfat above muscle dorsi QTL (5237),…
787	1	67506501	67512000	Drip loss QTL (7737), Drip loss QTL (7956), Liver weight QTL (13265), average daily gain QTL (5680), Drip loss QTL (8043), Potassium level QTL (6380), Estimated carcass lean content QTL (5960), CD2-positive leukocyte number QTL (4260), backfat at P2 position QTL (4107), average daily gain QTL (3673), Backfat at rump QTL (21206), Loin muscle area QTL (38072), backfat above muscle dorsi QTL (5237),…
788	1	68134001	68141000	Liver weight QTL (13265), average daily gain QTL (5680), Drip loss QTL (8043), Potassium level QTL (6380), Estimated carcass lean content QTL (5960), CD2-positive leukocyte number QTL (4260), backfat at P2 position QTL (4107), average daily gain QTL (3673), Backfat at rump QTL (21206), Loin muscle area QTL (38072), backfat above muscle dorsi QTL (5237), Feed intake QTL (871), White blood cell cou…
789	1	68741001	68746500	Liver weight QTL (13265), average daily gain QTL (5680), Drip loss QTL (8043), Potassium level QTL (6380), Estimated carcass lean content QTL (5960), CD2-positive leukocyte number QTL (4260), backfat at P2 position QTL (4107), average daily gain QTL (3673), Backfat at rump QTL (21206), Loin muscle area QTL (38072), backfat above muscle dorsi QTL (5237), Feed intake QTL (871), White blood cell cou…
790	1	68761001	68771500	Liver weight QTL (13265), average daily gain QTL (5680), Drip loss QTL (8043), Potassium level QTL (6380), Estimated carcass lean content QTL (5960), CD2-positive leukocyte number QTL (4260), backfat at P2 position QTL (4107), average daily gain QTL (3673), Backfat at rump QTL (21206), Loin muscle area QTL (38072), backfat above muscle dorsi QTL (5237), Feed intake QTL (871), White blood cell cou…
791	1	68796001	68808500	Liver weight QTL (13265), average daily gain QTL (5680), Drip loss QTL (8043), Potassium level QTL (6380), Estimated carcass lean content QTL (5960), CD2-positive leukocyte number QTL (4260), backfat at P2 position QTL (4107), average daily gain QTL (3673), Backfat at rump QTL (21206), Loin muscle area QTL (38072), backfat above muscle dorsi QTL (5237), Feed intake QTL (871), White blood cell cou…
792	1	69240501	69245500	Liver weight QTL (13265), average daily gain QTL (5680), Drip loss QTL (8043), Potassium level QTL (6380), Estimated carcass lean content QTL (5960), CD2-positive leukocyte number QTL (4260), backfat at P2 position QTL (4107), average daily gain QTL (3673), Backfat at rump QTL (21206), Loin muscle area QTL (38072), backfat above muscle dorsi QTL (5237), Feed intake QTL (871), White blood cell cou…
793	1	69889501	69894000	Liver weight QTL (13265), average daily gain QTL (5680), Drip loss QTL (8043), Potassium level QTL (6380), Estimated carcass lean content QTL (5960), CD2-positive leukocyte number QTL (4260), backfat at P2 position QTL (4107), average daily gain QTL (3673), Backfat at rump QTL (21206), Loin muscle area QTL (38072), backfat above muscle dorsi QTL (5237), Feed intake QTL (871), White blood cell cou…
794	1	71529501	71535000	Liver weight QTL (13265), average daily gain QTL (5680), Drip loss QTL (8043), Potassium level QTL (6380), Estimated carcass lean content QTL (5960), CD2-positive leukocyte number QTL (4260), backfat at P2 position QTL (4107), average daily gain QTL (3673), Backfat at rump QTL (21206), Loin muscle area QTL (38072), backfat above muscle dorsi QTL (5237), Feed intake QTL (871), White blood cell cou…
795	1	77868001	77877000	Liver weight QTL (13265), average daily gain QTL (5680), Drip loss QTL (8043), Potassium level QTL (6380), Estimated carcass lean content QTL (5960), Drip loss QTL (8248), CD2-positive leukocyte number QTL (4260), backfat at P2 position QTL (4107), average daily gain QTL (3673), Backfat at rump QTL (21206), Loin muscle area QTL (38072), backfat above muscle dorsi QTL (5237), Feed intake QTL (871)…
796	1	78665501	78670000	average daily gain QTL (5680), Drip loss QTL (8043), Potassium level QTL (6380), Estimated carcass lean content QTL (5960), CD2-positive leukocyte number QTL (4260), backfat at P2 position QTL (4107), average daily gain QTL (3673), Backfat at rump QTL (21206), Loin muscle area QTL (38072), backfat above muscle dorsi QTL (5237), Feed intake QTL (871), White blood cell counts QTL (15047), backfat a…
797	1	78761001	78767000	average daily gain QTL (5680), Drip loss QTL (8043), Potassium level QTL (6380), Estimated carcass lean content QTL (5960), CD2-positive leukocyte number QTL (4260), backfat at P2 position QTL (4107), average daily gain QTL (3673), Backfat at rump QTL (21206), Loin muscle area QTL (38072), backfat above muscle dorsi QTL (5237), Feed intake QTL (871), White blood cell counts QTL (15047), backfat a…
798	1	79271501	79277000	average daily gain QTL (5680), Drip loss QTL (8043), Potassium level QTL (6380), Estimated carcass lean content QTL (5960), CD2-positive leukocyte number QTL (4260), backfat at P2 position QTL (4107), average daily gain QTL (3673), Backfat at rump QTL (21206), Loin muscle area QTL (38072), backfat above muscle dorsi QTL (5237), Feed intake QTL (871), White blood cell counts QTL (15047), backfat a…
799	1	89020001	89027000	average daily gain QTL (5680), Drip loss QTL (8043), Potassium level QTL (6380), Estimated carcass lean content QTL (5960), CD2-positive leukocyte number QTL (4260), backfat at P2 position QTL (4107), average daily gain QTL (3673), Backfat at rump QTL (21206), Loin muscle area QTL (38072), backfat above muscle dorsi QTL (5237), Ear weight QTL (8853), Feed intake QTL (871), White blood cell counts…
800	1	89083501	89086500	average daily gain QTL (5680), Drip loss QTL (8043), Potassium level QTL (6380), Estimated carcass lean content QTL (5960), CD2-positive leukocyte number QTL (4260), backfat at P2 position QTL (4107), average daily gain QTL (3673), Backfat at rump QTL (21206), Loin muscle area QTL (38072), backfat above muscle dorsi QTL (5237), Ear weight QTL (8853), Feed intake QTL (871), White blood cell counts…
801	1	90496001	90501500	Drip loss QTL (8146), average daily gain QTL (5680), Drip loss QTL (8043), Potassium level QTL (6380), Estimated carcass lean content QTL (5960), CD2-positive leukocyte number QTL (4260), backfat at P2 position QTL (4107), average daily gain QTL (3673), Backfat at rump QTL (21206), Loin muscle area QTL (38072), backfat above muscle dorsi QTL (5237), Ear weight QTL (8853), Feed intake QTL (871), W…
802	1	90586501	90593000	Drip loss QTL (8146), average daily gain QTL (5680), Drip loss QTL (8043), Potassium level QTL (6380), Estimated carcass lean content QTL (5960), CD2-positive leukocyte number QTL (4260), backfat at P2 position QTL (4107), average daily gain QTL (3673), Backfat at rump QTL (21206), Loin muscle area QTL (38072), backfat above muscle dorsi QTL (5237), Ear weight QTL (8853), Feed intake QTL (871), W…
803	1	90678001	90684500	Drip loss QTL (8146), average daily gain QTL (5680), Drip loss QTL (8043), Potassium level QTL (6380), Estimated carcass lean content QTL (5960), CD2-positive leukocyte number QTL (4260), backfat at P2 position QTL (4107), average daily gain QTL (3673), Backfat at rump QTL (21206), Loin muscle area QTL (38072), backfat above muscle dorsi QTL (5237), Ear weight QTL (8853), Feed intake QTL (871), W…
804	1	92550501	92555000	average daily gain QTL (5680), Drip loss QTL (8043), Potassium level QTL (6380), Estimated carcass lean content QTL (5960), CD2-positive leukocyte number QTL (4260), backfat at P2 position QTL (4107), average daily gain QTL (3673), Backfat at rump QTL (21206), Loin muscle area QTL (38072), backfat above muscle dorsi QTL (5237), Ear weight QTL (8853), Feed intake QTL (871), White blood cell counts…
805	1	93641501	93649000	average daily gain QTL (5680), Drip loss QTL (8043), Potassium level QTL (6380), Estimated carcass lean content QTL (5960), CD2-positive leukocyte number QTL (4260), backfat at P2 position QTL (4107), average daily gain QTL (3673), Backfat at rump QTL (21206), Loin muscle area QTL (38072), backfat above muscle dorsi QTL (5237), Ear weight QTL (8853), Feed intake QTL (871), White blood cell counts…
806	1	95522001	95527500	average daily gain QTL (5680), Drip loss QTL (8043), Potassium level QTL (6380), Estimated carcass lean content QTL (5960), CD2-positive leukocyte number QTL (4260), backfat at P2 position QTL (4107), average daily gain QTL (3673), Backfat at rump QTL (21206), Loin muscle area QTL (38072), backfat above muscle dorsi QTL (5237), Ear weight QTL (8853), Feed intake QTL (871), White blood cell counts…
807	1	98447001	98452500	Drip loss QTL (7766), average daily gain QTL (5680), Drip loss QTL (8043), Potassium level QTL (6380), Estimated carcass lean content QTL (5960), CD2-positive leukocyte number QTL (4260), backfat at P2 position QTL (4107), Drip loss QTL (8450), CIE-L* QTL (4326), average daily gain QTL (3673), Backfat at rump QTL (21206), Loin muscle area QTL (38072), backfat above muscle dorsi QTL (5237), Ear we…
808	1	100666001	100670500	Drip loss QTL (7766), average daily gain QTL (5680), Drip loss QTL (8043), Potassium level QTL (6380), Estimated carcass lean content QTL (5960), CD2-positive leukocyte number QTL (4260), backfat at P2 position QTL (4107), Drip loss QTL (8450), CIE-L* QTL (4326), average daily gain QTL (3673), Backfat at rump QTL (21206), Loin muscle area QTL (38072), backfat above muscle dorsi QTL (5237), Ear we…
809	1	100847001	100854500	Drip loss QTL (7766), average daily gain QTL (5680), Drip loss QTL (8043), Potassium level QTL (6380), Estimated carcass lean content QTL (5960), CD2-positive leukocyte number QTL (4260), backfat at P2 position QTL (4107), Drip loss QTL (8450), CIE-L* QTL (4326), average daily gain QTL (3673), Backfat at rump QTL (21206), Loin muscle area QTL (38072), backfat above muscle dorsi QTL (5237), Ear we…
810	1	108793001	108797000	Drip loss QTL (8300), average daily gain QTL (5680), Drip loss QTL (8043), Potassium level QTL (6380), CD2-positive leukocyte number QTL (4260), backfat at P2 position QTL (4107), Linoleic acid content QTL (32101), pH for Semimembranosus QTL (5665), CIE-L* QTL (4326), average daily gain QTL (3673), Backfat at rump QTL (21206), Loin muscle area QTL (38072), backfat above muscle dorsi QTL (5237), E…
811	1	111600501	111608000	Drip loss QTL (8300), average daily gain QTL (5680), Drip loss QTL (8043), Potassium level QTL (6380), CD2-positive leukocyte number QTL (4260), backfat at P2 position QTL (4107), Linoleic acid content QTL (32101), pH for Semimembranosus QTL (5665), CIE-L* QTL (4326), average daily gain QTL (3673), Backfat at rump QTL (21206), Loin muscle area QTL (38072), backfat above muscle dorsi QTL (5237), E…
812	1	122072501	122077500	Drip loss QTL (8300), average daily gain QTL (5680), Potassium level QTL (6380), CD2-positive leukocyte number QTL (4260), backfat at P2 position QTL (4107), pH for Semimembranosus QTL (5665), CIE-L* QTL (4326), average daily gain QTL (3673), Backfat at rump QTL (21206), Loin muscle area QTL (38072), backfat above muscle dorsi QTL (5237), Ear weight QTL (8853), Backfat weight QTL (3171), Feed int…
813	1	127427501	127434500	Drip loss QTL (8300), average daily gain QTL (5680), Potassium level QTL (6380), CD2-positive leukocyte number QTL (4260), Lean meat weight QTL (65013), backfat at P2 position QTL (4107), pH for Semimembranosus QTL (5665), CIE-L* QTL (4326), average daily gain QTL (3673), Backfat at rump QTL (21206), Loin muscle area QTL (38072), backfat above muscle dorsi QTL (5237), Ear weight QTL (8853), Backf…
814	1	129556001	129563000	Drip loss QTL (8300), average daily gain QTL (5680), Potassium level QTL (6380), CD2-positive leukocyte number QTL (4260), backfat at P2 position QTL (4107), pH for Semimembranosus QTL (5665), CIE-L* QTL (4326), average daily gain QTL (3673), Backfat at rump QTL (21206), Loin muscle area QTL (38072), backfat above muscle dorsi QTL (5237), Ear weight QTL (8853), Backfat weight QTL (3171), Feed int…
815	1	129562501	129567500	Drip loss QTL (8300), average daily gain QTL (5680), Potassium level QTL (6380), CD2-positive leukocyte number QTL (4260), backfat at P2 position QTL (4107), pH for Semimembranosus QTL (5665), CIE-L* QTL (4326), average daily gain QTL (3673), Backfat at rump QTL (21206), Loin muscle area QTL (38072), backfat above muscle dorsi QTL (5237), Ear weight QTL (8853), Backfat weight QTL (3171), Feed int…
816	1	129891001	129895500	Drip loss QTL (8300), average daily gain QTL (5680), Potassium level QTL (6380), CD2-positive leukocyte number QTL (4260), backfat at P2 position QTL (4107), pH for Semimembranosus QTL (5665), CIE-L* QTL (4326), average daily gain QTL (3673), Backfat at rump QTL (21206), Loin muscle area QTL (38072), backfat above muscle dorsi QTL (5237), Ear weight QTL (8853), Backfat weight QTL (3171), Feed int…
817	1	129903501	129909000	Drip loss QTL (8300), average daily gain QTL (5680), Potassium level QTL (6380), CD2-positive leukocyte number QTL (4260), backfat at P2 position QTL (4107), pH for Semimembranosus QTL (5665), CIE-L* QTL (4326), average daily gain QTL (3673), Backfat at rump QTL (21206), Loin muscle area QTL (38072), backfat above muscle dorsi QTL (5237), Ear weight QTL (8853), Backfat weight QTL (3171), Feed int…
818	1	134956501	134961000	Drip loss QTL (8300), average daily gain QTL (5680), Potassium level QTL (6380), Fat percentage in carcass QTL (65014), CD2-positive leukocyte number QTL (4260), pH for Semimembranosus QTL (5665), CIE-L* QTL (4326), Backfat at rump QTL (21206), Platelet distribution width QTL (12312), Loin muscle area QTL (38072), backfat above muscle dorsi QTL (5237), Ear weight QTL (8853), Backfat weight QTL (3…
819	1	135054001	135060500	Drip loss QTL (8300), average daily gain QTL (5680), Potassium level QTL (6380), Fat percentage in carcass QTL (65014), CD2-positive leukocyte number QTL (4260), pH for Semimembranosus QTL (5665), CIE-L* QTL (4326), Backfat at rump QTL (21206), Platelet distribution width QTL (12312), Loin muscle area QTL (38072), backfat above muscle dorsi QTL (5237), Ear weight QTL (8853), Backfat weight QTL (3…
820	1	139058001	139064000	Drip loss QTL (8300), average daily gain QTL (5680), Potassium level QTL (6380), CD2-positive leukocyte number QTL (4260), Drip loss QTL (7744), pH for Semimembranosus QTL (5665), CIE-L* QTL (4326), Backfat at rump QTL (21206), Platelet distribution width QTL (12312), Loin muscle area QTL (38072), backfat above muscle dorsi QTL (5237), Ear weight QTL (8853), Backfat weight QTL (3171), Drip loss Q…
821	1	139205001	139210000	Drip loss QTL (8300), average daily gain QTL (5680), Potassium level QTL (6380), CD2-positive leukocyte number QTL (4260), Drip loss QTL (7744), pH for Semimembranosus QTL (5665), CIE-L* QTL (4326), Backfat at rump QTL (21206), Platelet distribution width QTL (12312), Loin muscle area QTL (38072), backfat above muscle dorsi QTL (5237), Ear weight QTL (8853), Backfat weight QTL (3171), Drip loss Q…
822	1	144758501	144767500	Drip loss QTL (8300), average daily gain QTL (5680), Potassium level QTL (6380), CD2-positive leukocyte number QTL (4260), pH for Semimembranosus QTL (5665), Backfat at rump QTL (21206), Platelet distribution width QTL (12312), Loin muscle area QTL (38072), backfat above muscle dorsi QTL (5237), Ear weight QTL (8853), Backfat weight QTL (3171), Feed intake QTL (871), White blood cell counts QTL (…
823	1	147278001	147284000	Drip loss QTL (8300), average daily gain QTL (5680), Potassium level QTL (6380), CD2-positive leukocyte number QTL (4260), pH for Semimembranosus QTL (5665), Backfat at rump QTL (21206), Platelet distribution width QTL (12312), Loin muscle area QTL (38072), backfat above muscle dorsi QTL (5237), Ear weight QTL (8853), Backfat weight QTL (3171), Feed intake QTL (871), White blood cell counts QTL (…
824	1	149260001	149267500	Drip loss QTL (8300), average daily gain QTL (5680), Potassium level QTL (6380), CD2-positive leukocyte number QTL (4260), pH for Semimembranosus QTL (5665), Backfat at rump QTL (21206), Platelet distribution width QTL (12312), Loin muscle area QTL (38072), backfat above muscle dorsi QTL (5237), Ear weight QTL (8853), Backfat weight QTL (3171), Feed intake QTL (871), White blood cell counts QTL (…
825	1	149340001	149345000	Drip loss QTL (8300), average daily gain QTL (5680), Potassium level QTL (6380), CD2-positive leukocyte number QTL (4260), pH for Semimembranosus QTL (5665), Backfat at rump QTL (21206), Platelet distribution width QTL (12312), Loin muscle area QTL (38072), backfat above muscle dorsi QTL (5237), Ear weight QTL (8853), Backfat weight QTL (3171), Feed intake QTL (871), White blood cell counts QTL (…
826	1	149371001	149376000	Drip loss QTL (8300), average daily gain QTL (5680), Potassium level QTL (6380), CD2-positive leukocyte number QTL (4260), pH for Semimembranosus QTL (5665), Backfat at rump QTL (21206), Platelet distribution width QTL (12312), Loin muscle area QTL (38072), backfat above muscle dorsi QTL (5237), Ear weight QTL (8853), Backfat weight QTL (3171), Feed intake QTL (871), White blood cell counts QTL (…
827	1	149379501	149389500	Drip loss QTL (8300), average daily gain QTL (5680), Potassium level QTL (6380), CD2-positive leukocyte number QTL (4260), pH for Semimembranosus QTL (5665), Backfat at rump QTL (21206), Platelet distribution width QTL (12312), Loin muscle area QTL (38072), backfat above muscle dorsi QTL (5237), Ear weight QTL (8853), Backfat weight QTL (3171), Feed intake QTL (871), White blood cell counts QTL (…
828	1	149404501	149412500	Drip loss QTL (8300), average daily gain QTL (5680), Potassium level QTL (6380), CD2-positive leukocyte number QTL (4260), pH for Semimembranosus QTL (5665), Backfat at rump QTL (21206), Platelet distribution width QTL (12312), Loin muscle area QTL (38072), backfat above muscle dorsi QTL (5237), Ear weight QTL (8853), Backfat weight QTL (3171), Feed intake QTL (871), White blood cell counts QTL (…
829	1	149432501	149438000	Drip loss QTL (8300), average daily gain QTL (5680), Potassium level QTL (6380), CD2-positive leukocyte number QTL (4260), pH for Semimembranosus QTL (5665), Backfat at rump QTL (21206), Platelet distribution width QTL (12312), Loin muscle area QTL (38072), backfat above muscle dorsi QTL (5237), Ear weight QTL (8853), Backfat weight QTL (3171), Feed intake QTL (871), White blood cell counts QTL (…
830	1	149500001	149505000	Drip loss QTL (8300), average daily gain QTL (5680), Potassium level QTL (6380), CD2-positive leukocyte number QTL (4260), pH for Semimembranosus QTL (5665), Backfat at rump QTL (21206), Platelet distribution width QTL (12312), Loin muscle area QTL (38072), backfat above muscle dorsi QTL (5237), Ear weight QTL (8853), Backfat weight QTL (3171), Feed intake QTL (871), White blood cell counts QTL (…
831	1	149559001	149567000	Drip loss QTL (8300), average daily gain QTL (5680), Potassium level QTL (6380), CD2-positive leukocyte number QTL (4260), pH for Semimembranosus QTL (5665), Backfat at rump QTL (21206), Platelet distribution width QTL (12312), Loin muscle area QTL (38072), backfat above muscle dorsi QTL (5237), Ear weight QTL (8853), Backfat weight QTL (3171), Feed intake QTL (871), White blood cell counts QTL (…
832	1	151003501	151009000	Drip loss QTL (8300), average daily gain QTL (5680), Potassium level QTL (6380), CD2-positive leukocyte number QTL (4260), pH for Semimembranosus QTL (5665), Backfat at rump QTL (21206), Platelet distribution width QTL (12312), Loin muscle area QTL (38072), backfat above muscle dorsi QTL (5237), Ear weight QTL (8853), Backfat weight QTL (3171), Feed intake QTL (871), White blood cell counts QTL (…
833	1	151313501	151318000	Drip loss QTL (8300), average daily gain QTL (5680), Potassium level QTL (6380), CD2-positive leukocyte number QTL (4260), pH for Semimembranosus QTL (5665), Backfat at rump QTL (21206), Platelet distribution width QTL (12312), Loin muscle area QTL (38072), backfat above muscle dorsi QTL (5237), Ear weight QTL (8853), Backfat weight QTL (3171), Feed intake QTL (871), White blood cell counts QTL (…
834	1	151429501	151435500	Drip loss QTL (8300), average daily gain QTL (5680), Potassium level QTL (6380), CD2-positive leukocyte number QTL (4260), pH for Semimembranosus QTL (5665), Backfat at rump QTL (21206), Platelet distribution width QTL (12312), Loin muscle area QTL (38072), backfat above muscle dorsi QTL (5237), Ear weight QTL (8853), Backfat weight QTL (3171), Feed intake QTL (871), White blood cell counts QTL (…
835	1	151458001	151464500	Drip loss QTL (8300), average daily gain QTL (5680), Potassium level QTL (6380), CD2-positive leukocyte number QTL (4260), pH for Semimembranosus QTL (5665), Backfat at rump QTL (21206), Platelet distribution width QTL (12312), Loin muscle area QTL (38072), backfat above muscle dorsi QTL (5237), Ear weight QTL (8853), Backfat weight QTL (3171), Feed intake QTL (871), White blood cell counts QTL (…
836	1	162012501	162017500	Drip loss QTL (8300), average daily gain QTL (5680), Potassium level QTL (6380), CD2-positive leukocyte number QTL (4260), Side fat thickness QTL (5958), pH for Semimembranosus QTL (5665), Backfat at rump QTL (21206), Platelet distribution width QTL (12312), Loin muscle area QTL (38072), backfat above muscle dorsi QTL (5237), Ear weight QTL (8853), Backfat weight QTL (3171), Feed intake QTL (871)…
837	1	167755001	167760500	Daily feed intake QTL (141), Drip loss QTL (8300), average daily gain QTL (5680), Potassium level QTL (6380), CD2-positive leukocyte number QTL (4260), Side fat thickness QTL (5958), pH for Semimembranosus QTL (5665), Head weight QTL (432), Backfat at tenth rib QTL (138), Backfat at rump QTL (21206), Platelet distribution width QTL (12312), Loin muscle area QTL (38072), backfat above muscle dorsi…
838	1	168280001	168282500	Daily feed intake QTL (141), Drip loss QTL (8300), average daily gain QTL (5680), Potassium level QTL (6380), CD2-positive leukocyte number QTL (4260), Side fat thickness QTL (5958), pH for Semimembranosus QTL (5665), Head weight QTL (432), Backfat at tenth rib QTL (138), Backfat at rump QTL (21206), Platelet distribution width QTL (12312), Loin muscle area QTL (38072), backfat above muscle dorsi…
839	1	170618501	170622500	Daily feed intake QTL (141), Drip loss QTL (8300), Backfat weight QTL (12724), average daily gain QTL (5680), Potassium level QTL (6380), CD2-positive leukocyte number QTL (4260), Side fat thickness QTL (5958), pH for Semimembranosus QTL (5665), Head weight QTL (432), Backfat at tenth rib QTL (138), Backfat at rump QTL (21206), Platelet distribution width QTL (12312), Loin muscle area QTL (38072)…
840	1	171251001	171255000	Daily feed intake QTL (141), Drip loss QTL (8300), Backfat weight QTL (12724), average daily gain QTL (5680), Potassium level QTL (6380), CD2-positive leukocyte number QTL (4260), Side fat thickness QTL (5958), pH for Semimembranosus QTL (5665), Head weight QTL (432), Backfat at tenth rib QTL (138), Backfat at rump QTL (21206), Platelet distribution width QTL (12312), Loin muscle area QTL (38072)…
841	1	171420001	171429000	Daily feed intake QTL (141), Drip loss QTL (8300), Backfat weight QTL (12724), average daily gain QTL (5680), Potassium level QTL (6380), CD2-positive leukocyte number QTL (4260), Side fat thickness QTL (5958), pH for Semimembranosus QTL (5665), Head weight QTL (432), Backfat at tenth rib QTL (138), Backfat at rump QTL (21206), Platelet distribution width QTL (12312), Loin muscle area QTL (38072)…
842	1	171585501	171593000	Daily feed intake QTL (141), Drip loss QTL (8300), Backfat weight QTL (12724), average daily gain QTL (5680), Potassium level QTL (6380), CD2-positive leukocyte number QTL (4260), Side fat thickness QTL (5958), pH for Semimembranosus QTL (5665), Head weight QTL (432), Backfat at tenth rib QTL (138), Backfat at rump QTL (21206), Platelet distribution width QTL (12312), Loin muscle area QTL (38072)…
843	1	171618001	171625000	Daily feed intake QTL (141), Drip loss QTL (8300), Backfat weight QTL (12724), average daily gain QTL (5680), Potassium level QTL (6380), CD2-positive leukocyte number QTL (4260), Side fat thickness QTL (5958), pH for Semimembranosus QTL (5665), Head weight QTL (432), Backfat at tenth rib QTL (138), Backfat at rump QTL (21206), Platelet distribution width QTL (12312), Loin muscle area QTL (38072)…
844	1	171669001	171680500	Daily feed intake QTL (141), Drip loss QTL (8300), Backfat weight QTL (12724), average daily gain QTL (5680), Potassium level QTL (6380), CD2-positive leukocyte number QTL (4260), Side fat thickness QTL (5958), pH for Semimembranosus QTL (5665), Head weight QTL (432), Backfat at tenth rib QTL (138), Backfat at rump QTL (21206), Platelet distribution width QTL (12312), Loin muscle area QTL (38072)…
845	1	171781501	171785000	Daily feed intake QTL (141), Drip loss QTL (8300), Backfat weight QTL (12724), average daily gain QTL (5680), Potassium level QTL (6380), CD2-positive leukocyte number QTL (4260), Side fat thickness QTL (5958), pH for Semimembranosus QTL (5665), Head weight QTL (432), Backfat at tenth rib QTL (138), Backfat at rump QTL (21206), Platelet distribution width QTL (12312), Loin muscle area QTL (38072)…
846	1	174106001	174111500	Daily feed intake QTL (141), Drip loss QTL (8132), Drip loss QTL (8300), Backfat weight QTL (12724), average daily gain QTL (5680), Potassium level QTL (6380), CD2-positive leukocyte number QTL (4260), Side fat thickness QTL (5958), pH for Semimembranosus QTL (5665), Head weight QTL (432), Backfat at tenth rib QTL (138), Backfat at rump QTL (21206), Platelet distribution width QTL (12312), Loin m…
847	1	177814501	177822500	Daily feed intake QTL (141), Drip loss QTL (8300), Average backfat thickness QTL (4016), Backfat weight QTL (12724), average daily gain QTL (5680), Potassium level QTL (6380), Backfat at last lumbar QTL (4015), CD2-positive leukocyte number QTL (4260), Side fat thickness QTL (5958), pH for Semimembranosus QTL (5665), Head weight QTL (432), Backfat at tenth rib QTL (138), Backfat at rump QTL (2120…
848	1	177941501	177948500	Daily feed intake QTL (141), Drip loss QTL (8300), Average backfat thickness QTL (4016), Backfat weight QTL (12724), average daily gain QTL (5680), Potassium level QTL (6380), Backfat at last lumbar QTL (4015), CD2-positive leukocyte number QTL (4260), Side fat thickness QTL (5958), pH for Semimembranosus QTL (5665), Head weight QTL (432), Backfat at tenth rib QTL (138), Backfat at rump QTL (2120…
849	1	186984501	186991000	Daily feed intake QTL (141), Drip loss QTL (8300), Average backfat thickness QTL (4016), Backfat weight QTL (12724), average daily gain QTL (5680), Potassium level QTL (6380), Backfat at last lumbar QTL (4015), CD2-positive leukocyte number QTL (4260), Side fat thickness QTL (5958), pH for Semimembranosus QTL (5665), Head weight QTL (432), Backfat at tenth rib QTL (138), Backfat at rump QTL (2120…
850	1	188269001	188274500	Daily feed intake QTL (141), Drip loss QTL (8300), Average backfat thickness QTL (4016), Backfat weight QTL (12724), average daily gain QTL (5680), Potassium level QTL (6380), Backfat at last lumbar QTL (4015), CD2-positive leukocyte number QTL (4260), Drip loss QTL (8274), Drip loss QTL (7996), Drip loss QTL (8261), Side fat thickness QTL (5958), pH for Semimembranosus QTL (5665), Head weight QT…
851	1	190174001	190182000	Daily feed intake QTL (141), Drip loss QTL (8300), Average backfat thickness QTL (4016), Backfat weight QTL (12724), average daily gain QTL (5680), Potassium level QTL (6380), CD2-positive leukocyte number QTL (4260), Side fat thickness QTL (5958), pH for Semimembranosus QTL (5665), Head weight QTL (432), Backfat at tenth rib QTL (138), Backfat at rump QTL (21206), Platelet distribution width QTL…
852	1	191025001	191035000	Daily feed intake QTL (141), Drip loss QTL (8300), Average backfat thickness QTL (4016), Backfat weight QTL (12724), average daily gain QTL (5680), Potassium level QTL (6380), CD2-positive leukocyte number QTL (4260), Side fat thickness QTL (5958), pH for Semimembranosus QTL (5665), Head weight QTL (432), Backfat at tenth rib QTL (138), Backfat at rump QTL (21206), Platelet distribution width QTL…
853	1	191264501	191273000	Daily feed intake QTL (141), Drip loss QTL (8300), Average backfat thickness QTL (4016), Backfat weight QTL (12724), average daily gain QTL (5680), Potassium level QTL (6380), CD2-positive leukocyte number QTL (4260), Side fat thickness QTL (5958), pH for Semimembranosus QTL (5665), Head weight QTL (432), Backfat at tenth rib QTL (138), Backfat at rump QTL (21206), Platelet distribution width QTL…
854	1	191351501	191356000	Daily feed intake QTL (141), Drip loss QTL (8300), Average backfat thickness QTL (4016), Backfat weight QTL (12724), average daily gain QTL (5680), Potassium level QTL (6380), CD2-positive leukocyte number QTL (4260), Side fat thickness QTL (5958), pH for Semimembranosus QTL (5665), Head weight QTL (432), Backfat at tenth rib QTL (138), Backfat at rump QTL (21206), Platelet distribution width QTL…
855	1	191867501	191871500	Daily feed intake QTL (141), Drip loss QTL (8300), Average backfat thickness QTL (4016), Backfat weight QTL (12724), average daily gain QTL (5680), Potassium level QTL (6380), CD2-positive leukocyte number QTL (4260), Side fat thickness QTL (5958), pH for Semimembranosus QTL (5665), Head weight QTL (432), Backfat at tenth rib QTL (138), Backfat at rump QTL (21206), Platelet distribution width QTL…
856	1	192338501	192349000	Daily feed intake QTL (141), Drip loss QTL (8300), Average backfat thickness QTL (4016), Backfat weight QTL (12724), average daily gain QTL (5680), Potassium level QTL (6380), CD2-positive leukocyte number QTL (4260), Side fat thickness QTL (5958), pH for Semimembranosus QTL (5665), Head weight QTL (432), Backfat at tenth rib QTL (138), Backfat at rump QTL (21206), Platelet distribution width QTL…
857	1	192551001	192559500	Daily feed intake QTL (141), Drip loss QTL (8300), Average backfat thickness QTL (4016), Backfat weight QTL (12724), average daily gain QTL (5680), Potassium level QTL (6380), CD2-positive leukocyte number QTL (4260), Side fat thickness QTL (5958), pH for Semimembranosus QTL (5665), Head weight QTL (432), Backfat at tenth rib QTL (138), Backfat at rump QTL (21206), Platelet distribution width QTL…
858	1	192893001	192901000	Daily feed intake QTL (141), Drip loss QTL (8300), Average backfat thickness QTL (4016), Backfat weight QTL (12724), average daily gain QTL (5680), Potassium level QTL (6380), CD2-positive leukocyte number QTL (4260), Side fat thickness QTL (5958), pH for Semimembranosus QTL (5665), Head weight QTL (432), Backfat at tenth rib QTL (138), Backfat at rump QTL (21206), Platelet distribution width QTL…
859	1	193140001	193145000	Daily feed intake QTL (141), Drip loss QTL (8300), Average backfat thickness QTL (4016), Backfat weight QTL (12724), average daily gain QTL (5680), Potassium level QTL (6380), CD2-positive leukocyte number QTL (4260), Side fat thickness QTL (5958), pH for Semimembranosus QTL (5665), Head weight QTL (432), Backfat at tenth rib QTL (138), Backfat at rump QTL (21206), Platelet distribution width QTL…
860	1	193246501	193249500	Daily feed intake QTL (141), Drip loss QTL (8300), Average backfat thickness QTL (4016), Backfat weight QTL (12724), average daily gain QTL (5680), Potassium level QTL (6380), CD2-positive leukocyte number QTL (4260), Side fat thickness QTL (5958), pH for Semimembranosus QTL (5665), Head weight QTL (432), Backfat at tenth rib QTL (138), Backfat at rump QTL (21206), Platelet distribution width QTL…
861	1	193261001	193267000	Daily feed intake QTL (141), Drip loss QTL (8300), Average backfat thickness QTL (4016), Backfat weight QTL (12724), average daily gain QTL (5680), Potassium level QTL (6380), CD2-positive leukocyte number QTL (4260), Side fat thickness QTL (5958), pH for Semimembranosus QTL (5665), Head weight QTL (432), Backfat at tenth rib QTL (138), Backfat at rump QTL (21206), Platelet distribution width QTL…
862	1	193271501	193279000	Daily feed intake QTL (141), Drip loss QTL (8300), Average backfat thickness QTL (4016), Backfat weight QTL (12724), average daily gain QTL (5680), Potassium level QTL (6380), CD2-positive leukocyte number QTL (4260), Side fat thickness QTL (5958), pH for Semimembranosus QTL (5665), Head weight QTL (432), Backfat at tenth rib QTL (138), Backfat at rump QTL (21206), Platelet distribution width QTL…
863	1	193891501	193899000	Daily feed intake QTL (141), Drip loss QTL (8300), Average backfat thickness QTL (4016), Backfat weight QTL (12724), average daily gain QTL (5680), Potassium level QTL (6380), CD2-positive leukocyte number QTL (4260), Side fat thickness QTL (5958), pH for Semimembranosus QTL (5665), Head weight QTL (432), Backfat at tenth rib QTL (138), Backfat at rump QTL (21206), Platelet distribution width QTL…
864	1	194161501	194166500	Daily feed intake QTL (141), Drip loss QTL (8300), Average backfat thickness QTL (4016), Backfat weight QTL (12724), average daily gain QTL (5680), Potassium level QTL (6380), CD2-positive leukocyte number QTL (4260), Side fat thickness QTL (5958), pH for Semimembranosus QTL (5665), Head weight QTL (432), Backfat at tenth rib QTL (138), Backfat at rump QTL (21206), Platelet distribution width QTL…
865	1	194172001	194178000	Daily feed intake QTL (141), Drip loss QTL (8300), Average backfat thickness QTL (4016), Backfat weight QTL (12724), average daily gain QTL (5680), Potassium level QTL (6380), CD2-positive leukocyte number QTL (4260), Side fat thickness QTL (5958), pH for Semimembranosus QTL (5665), Head weight QTL (432), Backfat at tenth rib QTL (138), Backfat at rump QTL (21206), Platelet distribution width QTL…
866	1	196320501	196326000	Daily feed intake QTL (141), Drip loss QTL (8300), Average backfat thickness QTL (4016), Backfat weight QTL (12724), average daily gain QTL (5680), Potassium level QTL (6380), CD2-positive leukocyte number QTL (4260), Side fat thickness QTL (5958), pH for Semimembranosus QTL (5665), Head weight QTL (432), Backfat at tenth rib QTL (138), Backfat at rump QTL (21206), Platelet distribution width QTL…
867	1	196492501	196497500	Daily feed intake QTL (141), Drip loss QTL (8300), Average backfat thickness QTL (4016), Backfat weight QTL (12724), average daily gain QTL (5680), Potassium level QTL (6380), CD2-positive leukocyte number QTL (4260), Side fat thickness QTL (5958), pH for Semimembranosus QTL (5665), Head weight QTL (432), Backfat at tenth rib QTL (138), Backfat at rump QTL (21206), Platelet distribution width QTL…
868	1	198494001	198499000	Daily feed intake QTL (141), Drip loss QTL (8300), Average backfat thickness QTL (4016), Backfat weight QTL (12724), average daily gain QTL (5680), Potassium level QTL (6380), CD2-positive leukocyte number QTL (4260), Side fat thickness QTL (5958), pH for Semimembranosus QTL (5665), Head weight QTL (432), Backfat at tenth rib QTL (138), Backfat at rump QTL (21206), Platelet distribution width QTL…
869	1	217285501	217291500	Daily feed intake QTL (141), Drip loss QTL (8300), Backfat weight QTL (12724), average daily gain QTL (5680), Potassium level QTL (6380), CD2-positive leukocyte number QTL (4260), Head weight QTL (432), Backfat at tenth rib QTL (138), Backfat at rump QTL (21206), Platelet distribution width QTL (12312), Loin muscle area QTL (38072), backfat above muscle dorsi QTL (5237), Backfat weight QTL (3171)…
870	1	217785501	217794000	Daily feed intake QTL (141), Drip loss QTL (8300), Backfat weight QTL (12724), average daily gain QTL (5680), Potassium level QTL (6380), CD2-positive leukocyte number QTL (4260), Head weight QTL (432), Backfat at tenth rib QTL (138), Backfat at rump QTL (21206), Platelet distribution width QTL (12312), Loin muscle area QTL (38072), backfat above muscle dorsi QTL (5237), Backfat weight QTL (3171)…
871	1	218898501	218904000	Daily feed intake QTL (141), Drip loss QTL (8300), Backfat weight QTL (12724), average daily gain QTL (5680), Potassium level QTL (6380), Drip loss QTL (7783), CD2-positive leukocyte number QTL (4260), Head weight QTL (432), Backfat at tenth rib QTL (138), Backfat at rump QTL (21206), Platelet distribution width QTL (12312), Loin muscle area QTL (38072), backfat above muscle dorsi QTL (5237), Bac…
872	1	220054001	220060500	Daily feed intake QTL (141), Drip loss QTL (8300), Backfat weight QTL (12724), average daily gain QTL (5680), Potassium level QTL (6380), CD2-positive leukocyte number QTL (4260), Head weight QTL (432), Backfat at tenth rib QTL (138), Backfat at rump QTL (21206), Platelet distribution width QTL (12312), Loin muscle area QTL (38072), backfat above muscle dorsi QTL (5237), Backfat weight QTL (3171)…
873	1	220216501	220221500	Daily feed intake QTL (141), Drip loss QTL (8300), Backfat weight QTL (12724), average daily gain QTL (5680), Potassium level QTL (6380), CD2-positive leukocyte number QTL (4260), Head weight QTL (432), Backfat at tenth rib QTL (138), Backfat at rump QTL (21206), Platelet distribution width QTL (12312), Loin muscle area QTL (38072), backfat above muscle dorsi QTL (5237), Backfat weight QTL (3171)…
874	1	220904001	220908500	Daily feed intake QTL (141), Drip loss QTL (8300), Ratio of glycolytic muscles weight to ham meat and bone weight QTL (1277), Backfat weight QTL (12724), average daily gain QTL (5680), average daily gain QTL (2847), Potassium level QTL (6380), CD2-positive leukocyte number QTL (4260), average daily gain QTL (2846), Head weight QTL (432), Backfat at tenth rib QTL (138), Backfat at rump QTL (21206)…
875	1	223111001	223117000	Daily feed intake QTL (141), Drip loss QTL (8300), Ratio of glycolytic muscles weight to ham meat and bone weight QTL (1277), Backfat weight QTL (12724), average daily gain QTL (5680), average daily gain QTL (2847), Potassium level QTL (6380), CD2-positive leukocyte number QTL (4260), Drip loss QTL (7809), average daily gain QTL (2846), Head weight QTL (432), Backfat at tenth rib QTL (138), Backf…
876	1	223208001	223214000	Daily feed intake QTL (141), Drip loss QTL (8300), Ratio of glycolytic muscles weight to ham meat and bone weight QTL (1277), Backfat weight QTL (12724), average daily gain QTL (5680), average daily gain QTL (2847), Potassium level QTL (6380), CD2-positive leukocyte number QTL (4260), Drip loss QTL (7809), average daily gain QTL (2846), Head weight QTL (432), Backfat at tenth rib QTL (138), Backf…
877	1	223657501	223668000	Daily feed intake QTL (141), Drip loss QTL (8300), Ratio of glycolytic muscles weight to ham meat and bone weight QTL (1277), Backfat weight QTL (12724), average daily gain QTL (5680), average daily gain QTL (2847), Potassium level QTL (6380), CD2-positive leukocyte number QTL (4260), Drip loss QTL (7809), average daily gain QTL (2846), Head weight QTL (432), Backfat at tenth rib QTL (138), Backf…
878	1	223864001	223875000	Daily feed intake QTL (141), Drip loss QTL (8300), Ratio of glycolytic muscles weight to ham meat and bone weight QTL (1277), Backfat weight QTL (12724), average daily gain QTL (5680), average daily gain QTL (2847), Potassium level QTL (6380), CD2-positive leukocyte number QTL (4260), Drip loss QTL (7809), average daily gain QTL (2846), Head weight QTL (432), Backfat at tenth rib QTL (138), Backf…
879	1	235247001	235252000	Drip loss QTL (8300), average daily gain QTL (5680), average daily gain QTL (2847), Hind feet conformation QTL (8912), Gestation length QTL (10617), average daily gain QTL (2846), Backfat at rump QTL (21206), Platelet distribution width QTL (12312), Loin muscle area QTL (38072), average daily gain QTL (16887), backfat above muscle dorsi QTL (5237), Fat-cuts percentage QTL (855), Locomotion QTL (4…
880	1	235312501	235339000	Drip loss QTL (8300), average daily gain QTL (5680), average daily gain QTL (2847), Hind feet conformation QTL (8912), Gestation length QTL (10617), average daily gain QTL (2846), Backfat at rump QTL (21206), Platelet distribution width QTL (12312), Loin muscle area QTL (38072), average daily gain QTL (16887), backfat above muscle dorsi QTL (5237), Fat-cuts percentage QTL (855), Locomotion QTL (4…
881	1	235348001	235355000	Drip loss QTL (8300), average daily gain QTL (5680), average daily gain QTL (2847), Hind feet conformation QTL (8912), Gestation length QTL (10617), average daily gain QTL (2846), Backfat at rump QTL (21206), Platelet distribution width QTL (12312), Loin muscle area QTL (38072), average daily gain QTL (16887), backfat above muscle dorsi QTL (5237), Fat-cuts percentage QTL (855), Locomotion QTL (4…
882	1	235472501	235479000	Drip loss QTL (8300), average daily gain QTL (5680), average daily gain QTL (2847), Hind feet conformation QTL (8912), Gestation length QTL (10617), average daily gain QTL (2846), Backfat at rump QTL (21206), Platelet distribution width QTL (12312), Loin muscle area QTL (38072), average daily gain QTL (16887), backfat above muscle dorsi QTL (5237), Fat-cuts percentage QTL (855), Locomotion QTL (4…
883	1	235487501	235492500	Drip loss QTL (8300), average daily gain QTL (5680), average daily gain QTL (2847), Hind feet conformation QTL (8912), Gestation length QTL (10617), average daily gain QTL (2846), Backfat at rump QTL (21206), Platelet distribution width QTL (12312), Loin muscle area QTL (38072), average daily gain QTL (16887), backfat above muscle dorsi QTL (5237), Fat-cuts percentage QTL (855), Locomotion QTL (4…
884	1	235494001	235510500	Drip loss QTL (8300), average daily gain QTL (5680), average daily gain QTL (2847), Hind feet conformation QTL (8912), Gestation length QTL (10617), average daily gain QTL (2846), Backfat at rump QTL (21206), Platelet distribution width QTL (12312), Loin muscle area QTL (38072), average daily gain QTL (16887), backfat above muscle dorsi QTL (5237), Fat-cuts percentage QTL (855), Locomotion QTL (4…
885	1	235520001	235527500	Drip loss QTL (8300), average daily gain QTL (5680), average daily gain QTL (2847), Hind feet conformation QTL (8912), Gestation length QTL (10617), average daily gain QTL (2846), Backfat at rump QTL (21206), Platelet distribution width QTL (12312), Loin muscle area QTL (38072), average daily gain QTL (16887), backfat above muscle dorsi QTL (5237), Fat-cuts percentage QTL (855), Locomotion QTL (4…
886	1	235536501	235543500	Drip loss QTL (8300), average daily gain QTL (5680), average daily gain QTL (2847), Hind feet conformation QTL (8912), Gestation length QTL (10617), average daily gain QTL (2846), Backfat at rump QTL (21206), Platelet distribution width QTL (12312), Loin muscle area QTL (38072), average daily gain QTL (16887), backfat above muscle dorsi QTL (5237), Fat-cuts percentage QTL (855), Locomotion QTL (4…
887	1	235546501	235552000	Drip loss QTL (8300), average daily gain QTL (5680), average daily gain QTL (2847), Hind feet conformation QTL (8912), Gestation length QTL (10617), average daily gain QTL (2846), Backfat at rump QTL (21206), Platelet distribution width QTL (12312), Loin muscle area QTL (38072), average daily gain QTL (16887), backfat above muscle dorsi QTL (5237), Fat-cuts percentage QTL (855), Locomotion QTL (4…
888	1	235627501	235637500	Drip loss QTL (8300), average daily gain QTL (5680), average daily gain QTL (2847), Hind feet conformation QTL (8912), Gestation length QTL (10617), average daily gain QTL (2846), Backfat at rump QTL (21206), Platelet distribution width QTL (12312), Loin muscle area QTL (38072), average daily gain QTL (16887), backfat above muscle dorsi QTL (5237), Fat-cuts percentage QTL (855), Locomotion QTL (4…
889	1	235640001	235649000	Drip loss QTL (8300), average daily gain QTL (5680), average daily gain QTL (2847), Hind feet conformation QTL (8912), Gestation length QTL (10617), average daily gain QTL (2846), Backfat at rump QTL (21206), Platelet distribution width QTL (12312), Loin muscle area QTL (38072), average daily gain QTL (16887), backfat above muscle dorsi QTL (5237), Fat-cuts percentage QTL (855), Locomotion QTL (4…
890	1	235650001	235655000	Drip loss QTL (8300), average daily gain QTL (5680), average daily gain QTL (2847), Hind feet conformation QTL (8912), Gestation length QTL (10617), average daily gain QTL (2846), Backfat at rump QTL (21206), Platelet distribution width QTL (12312), Loin muscle area QTL (38072), average daily gain QTL (16887), backfat above muscle dorsi QTL (5237), Fat-cuts percentage QTL (855), Locomotion QTL (4…
891	1	235654501	235660500	Drip loss QTL (8300), average daily gain QTL (5680), average daily gain QTL (2847), Hind feet conformation QTL (8912), Gestation length QTL (10617), average daily gain QTL (2846), Backfat at rump QTL (21206), Platelet distribution width QTL (12312), Loin muscle area QTL (38072), average daily gain QTL (16887), backfat above muscle dorsi QTL (5237), Fat-cuts percentage QTL (855), Locomotion QTL (4…
892	1	235659501	235664000	Drip loss QTL (8300), average daily gain QTL (5680), average daily gain QTL (2847), Hind feet conformation QTL (8912), Gestation length QTL (10617), average daily gain QTL (2846), Backfat at rump QTL (21206), Platelet distribution width QTL (12312), Loin muscle area QTL (38072), average daily gain QTL (16887), backfat above muscle dorsi QTL (5237), Fat-cuts percentage QTL (855), Locomotion QTL (4…
893	1	235689001	235694000	Drip loss QTL (8300), average daily gain QTL (5680), average daily gain QTL (2847), Hind feet conformation QTL (8912), Gestation length QTL (10617), average daily gain QTL (2846), Backfat at rump QTL (21206), Platelet distribution width QTL (12312), Loin muscle area QTL (38072), average daily gain QTL (16887), backfat above muscle dorsi QTL (5237), Fat-cuts percentage QTL (855), Locomotion QTL (4…
894	1	235739501	235752000	Drip loss QTL (8300), average daily gain QTL (5680), average daily gain QTL (2847), Hind feet conformation QTL (8912), Gestation length QTL (10617), average daily gain QTL (2846), Backfat at rump QTL (21206), Platelet distribution width QTL (12312), Loin muscle area QTL (38072), average daily gain QTL (16887), backfat above muscle dorsi QTL (5237), Fat-cuts percentage QTL (855), Locomotion QTL (4…
895	1	235950001	235957000	Drip loss QTL (8300), average daily gain QTL (5680), average daily gain QTL (2847), Hind feet conformation QTL (8912), Gestation length QTL (10617), average daily gain QTL (2846), Backfat at rump QTL (21206), Platelet distribution width QTL (12312), Loin muscle area QTL (38072), average daily gain QTL (16887), backfat above muscle dorsi QTL (5237), Fat-cuts percentage QTL (855), Locomotion QTL (4…
896	1	236059001	236065500	Drip loss QTL (8300), average daily gain QTL (5680), average daily gain QTL (2847), Hind feet conformation QTL (8912), Gestation length QTL (10617), average daily gain QTL (2846), Backfat at rump QTL (21206), Platelet distribution width QTL (12312), Loin muscle area QTL (38072), average daily gain QTL (16887), backfat above muscle dorsi QTL (5237), Fat-cuts percentage QTL (855), Locomotion QTL (4…
897	1	236154001	236158500	Drip loss QTL (8300), average daily gain QTL (5680), average daily gain QTL (2847), Hind feet conformation QTL (8912), Gestation length QTL (10617), average daily gain QTL (2846), Backfat at rump QTL (21206), Platelet distribution width QTL (12312), Loin muscle area QTL (38072), average daily gain QTL (16887), backfat above muscle dorsi QTL (5237), Fat-cuts percentage QTL (855), Locomotion QTL (4…
898	1	236225001	236233000	Drip loss QTL (8300), average daily gain QTL (5680), average daily gain QTL (2847), Hind feet conformation QTL (8912), Gestation length QTL (10617), average daily gain QTL (2846), Backfat at rump QTL (21206), Platelet distribution width QTL (12312), Loin muscle area QTL (38072), average daily gain QTL (16887), backfat above muscle dorsi QTL (5237), Fat-cuts percentage QTL (855), Locomotion QTL (4…
899	1	236285501	236291500	Drip loss QTL (8300), average daily gain QTL (5680), average daily gain QTL (2847), Hind feet conformation QTL (8912), Gestation length QTL (10617), average daily gain QTL (2846), Backfat at rump QTL (21206), Platelet distribution width QTL (12312), Loin muscle area QTL (38072), average daily gain QTL (16887), backfat above muscle dorsi QTL (5237), Fat-cuts percentage QTL (855), Locomotion QTL (4…
900	1	236764001	236772500	Drip loss QTL (8300), average daily gain QTL (5680), average daily gain QTL (2847), Hind feet conformation QTL (8912), Gestation length QTL (10617), average daily gain QTL (2846), Backfat at rump QTL (21206), Platelet distribution width QTL (12312), Loin muscle area QTL (38072), average daily gain QTL (16887), backfat above muscle dorsi QTL (5237), Fat-cuts percentage QTL (855), Locomotion QTL (4…
901	1	237405001	237411000	Drip loss QTL (8300), average daily gain QTL (5680), average daily gain QTL (2847), Hind feet conformation QTL (8912), Gestation length QTL (10617), average daily gain QTL (2846), Backfat at rump QTL (21206), Platelet distribution width QTL (12312), Loin muscle area QTL (38072), average daily gain QTL (16887), backfat above muscle dorsi QTL (5237), Fat-cuts percentage QTL (855), Locomotion QTL (4…
902	1	237457001	237467000	Drip loss QTL (8300), average daily gain QTL (5680), average daily gain QTL (2847), Hind feet conformation QTL (8912), Gestation length QTL (10617), average daily gain QTL (2846), Backfat at rump QTL (21206), Platelet distribution width QTL (12312), Loin muscle area QTL (38072), average daily gain QTL (16887), backfat above muscle dorsi QTL (5237), Fat-cuts percentage QTL (855), Locomotion QTL (4…
903	1	237597001	237603500	Drip loss QTL (8300), average daily gain QTL (5680), average daily gain QTL (2847), Hind feet conformation QTL (8912), Gestation length QTL (10617), average daily gain QTL (2846), Backfat at rump QTL (21206), Platelet distribution width QTL (12312), Loin muscle area QTL (38072), average daily gain QTL (16887), backfat above muscle dorsi QTL (5237), Fat-cuts percentage QTL (855), Locomotion QTL (4…
904	1	237600501	237615000	Drip loss QTL (8300), average daily gain QTL (5680), average daily gain QTL (2847), Hind feet conformation QTL (8912), Gestation length QTL (10617), average daily gain QTL (2846), Backfat at rump QTL (21206), Platelet distribution width QTL (12312), Loin muscle area QTL (38072), average daily gain QTL (16887), backfat above muscle dorsi QTL (5237), Fat-cuts percentage QTL (855), Locomotion QTL (4…
905	1	237678001	237685500	Drip loss QTL (8300), average daily gain QTL (5680), average daily gain QTL (2847), Hind feet conformation QTL (8912), Gestation length QTL (10617), average daily gain QTL (2846), Backfat at rump QTL (21206), Platelet distribution width QTL (12312), Loin muscle area QTL (38072), average daily gain QTL (16887), backfat above muscle dorsi QTL (5237), Fat-cuts percentage QTL (855), Locomotion QTL (4…
906	1	237736001	237744500	Drip loss QTL (8300), average daily gain QTL (5680), average daily gain QTL (2847), Hind feet conformation QTL (8912), Gestation length QTL (10617), average daily gain QTL (2846), Backfat at rump QTL (21206), Platelet distribution width QTL (12312), Loin muscle area QTL (38072), average daily gain QTL (16887), backfat above muscle dorsi QTL (5237), Fat-cuts percentage QTL (855), Locomotion QTL (4…
907	1	237781001	237785500	Drip loss QTL (8300), average daily gain QTL (5680), average daily gain QTL (2847), Hind feet conformation QTL (8912), Gestation length QTL (10617), average daily gain QTL (2846), Backfat at rump QTL (21206), Platelet distribution width QTL (12312), Loin muscle area QTL (38072), average daily gain QTL (16887), backfat above muscle dorsi QTL (5237), Fat-cuts percentage QTL (855), Locomotion QTL (4…
908	1	237977501	237983000	Drip loss QTL (8300), average daily gain QTL (5680), average daily gain QTL (2847), Hind feet conformation QTL (8912), Gestation length QTL (10617), average daily gain QTL (2846), Backfat at rump QTL (21206), Platelet distribution width QTL (12312), Loin muscle area QTL (38072), average daily gain QTL (16887), backfat above muscle dorsi QTL (5237), Fat-cuts percentage QTL (855), Locomotion QTL (4…
909	1	238119001	238124000	Drip loss QTL (8300), average daily gain QTL (5680), average daily gain QTL (2847), Hind feet conformation QTL (8912), Gestation length QTL (10617), average daily gain QTL (2846), Backfat at rump QTL (21206), Platelet distribution width QTL (12312), Loin muscle area QTL (38072), average daily gain QTL (16887), backfat above muscle dorsi QTL (5237), Fat-cuts percentage QTL (855), Locomotion QTL (4…
910	1	238150001	238156500	Drip loss QTL (8300), average daily gain QTL (5680), average daily gain QTL (2847), Hind feet conformation QTL (8912), Gestation length QTL (10617), average daily gain QTL (2846), Backfat at rump QTL (21206), Platelet distribution width QTL (12312), Loin muscle area QTL (38072), average daily gain QTL (16887), backfat above muscle dorsi QTL (5237), Fat-cuts percentage QTL (855), Locomotion QTL (4…
911	1	238730001	238738000	Drip loss QTL (8300), average daily gain QTL (5680), average daily gain QTL (2847), Hind feet conformation QTL (8912), Gestation length QTL (10617), average daily gain QTL (2846), Backfat at rump QTL (21206), Platelet distribution width QTL (12312), Loin muscle area QTL (38072), average daily gain QTL (16887), backfat above muscle dorsi QTL (5237), Fat-cuts percentage QTL (855), Locomotion QTL (4…
912	1	238858001	238867500	Drip loss QTL (8300), average daily gain QTL (5680), average daily gain QTL (2847), Hind feet conformation QTL (8912), Gestation length QTL (10617), average daily gain QTL (2846), Backfat at rump QTL (21206), Platelet distribution width QTL (12312), Loin muscle area QTL (38072), average daily gain QTL (16887), backfat above muscle dorsi QTL (5237), Fat-cuts percentage QTL (855), Locomotion QTL (4…
913	1	238883001	238892000	Drip loss QTL (8300), average daily gain QTL (5680), average daily gain QTL (2847), Hind feet conformation QTL (8912), Gestation length QTL (10617), average daily gain QTL (2846), Backfat at rump QTL (21206), Platelet distribution width QTL (12312), Loin muscle area QTL (38072), average daily gain QTL (16887), backfat above muscle dorsi QTL (5237), Fat-cuts percentage QTL (855), Locomotion QTL (4…
914	1	239075501	239081000	Drip loss QTL (8300), average daily gain QTL (5680), average daily gain QTL (2847), Hind feet conformation QTL (8912), Gestation length QTL (10617), average daily gain QTL (2846), Backfat at rump QTL (21206), Platelet distribution width QTL (12312), Loin muscle area QTL (38072), average daily gain QTL (16887), backfat above muscle dorsi QTL (5237), Fat-cuts percentage QTL (855), Locomotion QTL (4…
915	1	239097501	239104500	Drip loss QTL (8300), average daily gain QTL (5680), average daily gain QTL (2847), Hind feet conformation QTL (8912), Gestation length QTL (10617), average daily gain QTL (2846), Backfat at rump QTL (21206), Platelet distribution width QTL (12312), Loin muscle area QTL (38072), average daily gain QTL (16887), backfat above muscle dorsi QTL (5237), Fat-cuts percentage QTL (855), Locomotion QTL (4…
916	1	244406001	244413500	Drip loss QTL (8300), average daily gain QTL (5680), average daily gain QTL (2847), Hind feet conformation QTL (8912), Gestation length QTL (10617), average daily gain QTL (2846), Backfat at rump QTL (21206), Loin muscle area QTL (38072), average daily gain QTL (16887), backfat above muscle dorsi QTL (5237), Fat-cuts percentage QTL (855), Locomotion QTL (478), White blood cell counts QTL (15047),…
917	1	246055501	246059500	Drip loss QTL (8300), average daily gain QTL (5680), average daily gain QTL (2847), Hind feet conformation QTL (8912), Gestation length QTL (10617), average daily gain QTL (2846), Backfat at rump QTL (21206), Loin muscle area QTL (38072), average daily gain QTL (16887), backfat above muscle dorsi QTL (5237), Fat-cuts percentage QTL (855), Locomotion QTL (478), White blood cell counts QTL (15047),…
918	1	251606501	251613000	Drip loss QTL (8300), average daily gain QTL (5680), average daily gain QTL (2847), Hind feet conformation QTL (8912), Gestation length QTL (10617), average daily gain QTL (2846), Backfat at rump QTL (21206), Loin muscle area QTL (38072), average daily gain QTL (16887), backfat above muscle dorsi QTL (5237), Fat-cuts percentage QTL (855), Locomotion QTL (478), White blood cell counts QTL (15047),…
919	1	253227001	253233500	Drip loss QTL (8300), average daily gain QTL (5680), average daily gain QTL (2847), Hind feet conformation QTL (8912), backfat at last rib QTL (5957), Gestation length QTL (10617), average daily gain QTL (2846), Backfat at rump QTL (21206), Loin muscle area QTL (38072), average daily gain QTL (16887), backfat above muscle dorsi QTL (5237), Fat-cuts percentage QTL (855), Locomotion QTL (478), Whit…
920	1	253241001	253248500	Drip loss QTL (8300), average daily gain QTL (5680), average daily gain QTL (2847), Hind feet conformation QTL (8912), backfat at last rib QTL (5957), Gestation length QTL (10617), average daily gain QTL (2846), Backfat at rump QTL (21206), Loin muscle area QTL (38072), average daily gain QTL (16887), backfat above muscle dorsi QTL (5237), Fat-cuts percentage QTL (855), Locomotion QTL (478), Whit…
921	1	253405001	253419000	Drip loss QTL (8300), average daily gain QTL (5680), average daily gain QTL (2847), Hind feet conformation QTL (8912), backfat at last rib QTL (5957), Gestation length QTL (10617), average daily gain QTL (2846), Backfat at rump QTL (21206), Loin muscle area QTL (38072), average daily gain QTL (16887), backfat above muscle dorsi QTL (5237), Fat-cuts percentage QTL (855), Locomotion QTL (478), Whit…
922	1	253427501	253439500	Drip loss QTL (8300), average daily gain QTL (5680), average daily gain QTL (2847), Hind feet conformation QTL (8912), backfat at last rib QTL (5957), Gestation length QTL (10617), average daily gain QTL (2846), Backfat at rump QTL (21206), Loin muscle area QTL (38072), average daily gain QTL (16887), backfat above muscle dorsi QTL (5237), Fat-cuts percentage QTL (855), Locomotion QTL (478), Whit…
923	1	253712001	253719000	Drip loss QTL (8300), average daily gain QTL (5680), average daily gain QTL (2847), Hind feet conformation QTL (8912), backfat at last rib QTL (5957), Gestation length QTL (10617), average daily gain QTL (2846), Backfat at rump QTL (21206), Loin muscle area QTL (38072), average daily gain QTL (16887), backfat above muscle dorsi QTL (5237), Fat-cuts percentage QTL (855), Locomotion QTL (478), Whit…
924	1	253789501	253798500	Drip loss QTL (8300), average daily gain QTL (5680), average daily gain QTL (2847), Hind feet conformation QTL (8912), backfat at last rib QTL (5957), Gestation length QTL (10617), average daily gain QTL (2846), Backfat at rump QTL (21206), Loin muscle area QTL (38072), average daily gain QTL (16887), backfat above muscle dorsi QTL (5237), Fat-cuts percentage QTL (855), Locomotion QTL (478), Whit…
925	1	253798501	253803500	Drip loss QTL (8300), average daily gain QTL (5680), average daily gain QTL (2847), Hind feet conformation QTL (8912), backfat at last rib QTL (5957), Gestation length QTL (10617), average daily gain QTL (2846), Backfat at rump QTL (21206), Loin muscle area QTL (38072), average daily gain QTL (16887), backfat above muscle dorsi QTL (5237), Fat-cuts percentage QTL (855), Locomotion QTL (478), Whit…
926	1	253898501	253911500	Drip loss QTL (8300), average daily gain QTL (5680), average daily gain QTL (2847), Hind feet conformation QTL (8912), backfat at last rib QTL (5957), Gestation length QTL (10617), average daily gain QTL (2846), Backfat at rump QTL (21206), Loin muscle area QTL (38072), average daily gain QTL (16887), backfat above muscle dorsi QTL (5237), Fat-cuts percentage QTL (855), Locomotion QTL (478), Whit…
927	1	253910501	253916500	Drip loss QTL (8300), average daily gain QTL (5680), average daily gain QTL (2847), Hind feet conformation QTL (8912), backfat at last rib QTL (5957), Gestation length QTL (10617), average daily gain QTL (2846), Backfat at rump QTL (21206), Loin muscle area QTL (38072), average daily gain QTL (16887), backfat above muscle dorsi QTL (5237), Fat-cuts percentage QTL (855), Locomotion QTL (478), Whit…
928	1	253981001	253992500	Drip loss QTL (8300), average daily gain QTL (5680), average daily gain QTL (2847), Hind feet conformation QTL (8912), backfat at last rib QTL (5957), Gestation length QTL (10617), average daily gain QTL (2846), Backfat at rump QTL (21206), Loin muscle area QTL (38072), average daily gain QTL (16887), backfat above muscle dorsi QTL (5237), Fat-cuts percentage QTL (855), Locomotion QTL (478), Whit…
929	1	253993001	254000000	Drip loss QTL (8300), average daily gain QTL (5680), average daily gain QTL (2847), Hind feet conformation QTL (8912), backfat at last rib QTL (5957), Gestation length QTL (10617), average daily gain QTL (2846), Backfat at rump QTL (21206), Loin muscle area QTL (38072), average daily gain QTL (16887), backfat above muscle dorsi QTL (5237), Fat-cuts percentage QTL (855), Locomotion QTL (478), Whit…
930	1	254086501	254092000	Drip loss QTL (8300), average daily gain QTL (5680), average daily gain QTL (2847), Hind feet conformation QTL (8912), backfat at last rib QTL (5957), Gestation length QTL (10617), average daily gain QTL (2846), Backfat at rump QTL (21206), Loin muscle area QTL (38072), average daily gain QTL (16887), backfat above muscle dorsi QTL (5237), Fat-cuts percentage QTL (855), Locomotion QTL (478), Whit…
931	1	254333501	254340000	Drip loss QTL (8300), average daily gain QTL (5680), average daily gain QTL (2847), Hind feet conformation QTL (8912), backfat at last rib QTL (5957), Gestation length QTL (10617), average daily gain QTL (2846), Backfat at rump QTL (21206), Loin muscle area QTL (38072), average daily gain QTL (16887), backfat above muscle dorsi QTL (5237), Fat-cuts percentage QTL (855), Locomotion QTL (478), Whit…
932	1	254341501	254350500	Drip loss QTL (8300), average daily gain QTL (5680), average daily gain QTL (2847), Hind feet conformation QTL (8912), backfat at last rib QTL (5957), Gestation length QTL (10617), average daily gain QTL (2846), Backfat at rump QTL (21206), Loin muscle area QTL (38072), average daily gain QTL (16887), backfat above muscle dorsi QTL (5237), Fat-cuts percentage QTL (855), Locomotion QTL (478), Whit…
933	1	260019001	260025500	Drip loss QTL (8300), average daily gain QTL (5680), average daily gain QTL (2847), Gestation length QTL (10617), average daily gain QTL (2846), Backfat at rump QTL (21206), Loin muscle area QTL (38072), average daily gain QTL (16887), backfat above muscle dorsi QTL (5237), Fat-cuts percentage QTL (855), White blood cell counts QTL (15047), Drip loss QTL (8131), average daily gain QTL (22269), ba…
934	1	272511501	272517500	Average backfat thickness QTL (35), Drip loss QTL (8300), Average backfat thickness QTL (3145), External fat on ham QTL (861), average daily gain QTL (5680), Average backfat thickness QTL (310), White blood cell counts QTL (5456), PH for Longissmus dorsi QTL (3169), Gestation length QTL (10617), Lean cuts percentage QTL (808), Backfat at rump QTL (21206), Vertebra number QTL (21301), Loin muscle …
935	1	272632501	272641500	Average backfat thickness QTL (35), Drip loss QTL (8300), Average backfat thickness QTL (3145), External fat on ham QTL (861), average daily gain QTL (5680), Average backfat thickness QTL (310), White blood cell counts QTL (5456), PH for Longissmus dorsi QTL (3169), Gestation length QTL (10617), Lean cuts percentage QTL (808), Backfat at rump QTL (21206), Vertebra number QTL (21301), Loin muscle …
936	1	273230001	273233500	Average backfat thickness QTL (35), Drip loss QTL (8300), Average backfat thickness QTL (3145), External fat on ham QTL (861), average daily gain QTL (5680), Average backfat thickness QTL (310), White blood cell counts QTL (5456), PH for Longissmus dorsi QTL (3169), Gestation length QTL (10617), Lean cuts percentage QTL (808), Backfat at rump QTL (21206), Vertebra number QTL (21301), Loin muscle …
937	1	273722501	273730000	Average backfat thickness QTL (35), Drip loss QTL (8300), Average backfat thickness QTL (3145), External fat on ham QTL (861), average daily gain QTL (5680), Average backfat thickness QTL (310), White blood cell counts QTL (5456), PH for Longissmus dorsi QTL (3169), Gestation length QTL (10617), Lean cuts percentage QTL (808), Backfat at rump QTL (21206), Vertebra number QTL (21301), Loin muscle …
938	1	273757501	273761000	Average backfat thickness QTL (35), Drip loss QTL (8300), Average backfat thickness QTL (3145), External fat on ham QTL (861), average daily gain QTL (5680), Average backfat thickness QTL (310), White blood cell counts QTL (5456), PH for Longissmus dorsi QTL (3169), Gestation length QTL (10617), Lean cuts percentage QTL (808), Backfat at rump QTL (21206), Vertebra number QTL (21301), Loin muscle …
939	1	273794501	273805000	Average backfat thickness QTL (35), Drip loss QTL (8300), Average backfat thickness QTL (3145), External fat on ham QTL (861), average daily gain QTL (5680), Average backfat thickness QTL (310), White blood cell counts QTL (5456), PH for Longissmus dorsi QTL (3169), Gestation length QTL (10617), Lean cuts percentage QTL (808), Backfat at rump QTL (21206), Vertebra number QTL (21301), Loin muscle …
940	1	273870001	273873500	Average backfat thickness QTL (35), Drip loss QTL (8300), Average backfat thickness QTL (3145), External fat on ham QTL (861), average daily gain QTL (5680), Average backfat thickness QTL (310), White blood cell counts QTL (5456), PH for Longissmus dorsi QTL (3169), Gestation length QTL (10617), Lean cuts percentage QTL (808), Backfat at rump QTL (21206), Vertebra number QTL (21301), Loin muscle …
941	1	273879501	273887000	Average backfat thickness QTL (35), Drip loss QTL (8300), Average backfat thickness QTL (3145), External fat on ham QTL (861), average daily gain QTL (5680), Average backfat thickness QTL (310), White blood cell counts QTL (5456), PH for Longissmus dorsi QTL (3169), Gestation length QTL (10617), Lean cuts percentage QTL (808), Backfat at rump QTL (21206), Vertebra number QTL (21301), Loin muscle …
942	1	273923501	273928000	Average backfat thickness QTL (35), Drip loss QTL (8300), Average backfat thickness QTL (3145), External fat on ham QTL (861), average daily gain QTL (5680), Average backfat thickness QTL (310), White blood cell counts QTL (5456), PH for Longissmus dorsi QTL (3169), Gestation length QTL (10617), Lean cuts percentage QTL (808), Backfat at rump QTL (21206), Vertebra number QTL (21301), Loin muscle …
943	1	273930001	273937000	Average backfat thickness QTL (35), Drip loss QTL (8300), Average backfat thickness QTL (3145), External fat on ham QTL (861), average daily gain QTL (5680), Average backfat thickness QTL (310), White blood cell counts QTL (5456), PH for Longissmus dorsi QTL (3169), Gestation length QTL (10617), Lean cuts percentage QTL (808), Backfat at rump QTL (21206), Vertebra number QTL (21301), Loin muscle …
944	1	273992001	273997000	Average backfat thickness QTL (35), Drip loss QTL (8300), Average backfat thickness QTL (3145), External fat on ham QTL (861), average daily gain QTL (5680), Average backfat thickness QTL (310), White blood cell counts QTL (5456), PH for Longissmus dorsi QTL (3169), Gestation length QTL (10617), Lean cuts percentage QTL (808), Backfat at rump QTL (21206), Vertebra number QTL (21301), Loin muscle …
945	1	274012001	274018500	Average backfat thickness QTL (35), Drip loss QTL (8300), Average backfat thickness QTL (3145), External fat on ham QTL (861), average daily gain QTL (5680), Average backfat thickness QTL (310), White blood cell counts QTL (5456), PH for Longissmus dorsi QTL (3169), Gestation length QTL (10617), Lean cuts percentage QTL (808), Backfat at rump QTL (21206), Vertebra number QTL (21301), Loin muscle …
946	1	274097001	274102500	Average backfat thickness QTL (35), Drip loss QTL (8300), Average backfat thickness QTL (3145), External fat on ham QTL (861), average daily gain QTL (5680), Average backfat thickness QTL (310), White blood cell counts QTL (5456), PH for Longissmus dorsi QTL (3169), Gestation length QTL (10617), Lean cuts percentage QTL (808), Backfat at rump QTL (21206), Vertebra number QTL (21301), Loin muscle …
947	1	274245001	274252000	Average backfat thickness QTL (35), Drip loss QTL (8300), Average backfat thickness QTL (3145), External fat on ham QTL (861), average daily gain QTL (5680), Average backfat thickness QTL (310), White blood cell counts QTL (5456), PH for Longissmus dorsi QTL (3169), Lean cuts percentage QTL (808), Backfat at rump QTL (21206), Vertebra number QTL (21301), Loin muscle area QTL (38072), backfat abov…
948	1	277348001	277353000	Average backfat thickness QTL (35), Drip loss QTL (8300), Average backfat thickness QTL (3145), External fat on ham QTL (861), average daily gain QTL (5680), White blood cell counts QTL (5456), PH for Longissmus dorsi QTL (3169), Lean cuts percentage QTL (808), Backfat at rump QTL (21206), Vertebra number QTL (21301), Loin muscle area QTL (38072), backfat above muscle dorsi QTL (5237), Thoracic v…
949	1	288964501	288970000	Average backfat thickness QTL (35), Fat to meat ratio QTL (12739), Drip loss QTL (8300), Lean meat percentage QTL (824), backfat at last rib QTL (3666), Average backfat thickness QTL (3145), average daily gain QTL (5680), Fat-cuts percentage QTL (12727), PH for Longissmus dorsi QTL (3169), Loin muscle area QTL (13352), Backfat at rump QTL (21206), Loin muscle area QTL (38072), backfat above muscl…
950	1	289163001	289176500	Average backfat thickness QTL (35), Fat to meat ratio QTL (12739), Drip loss QTL (8300), Lean meat percentage QTL (824), backfat at last rib QTL (3666), Average backfat thickness QTL (3145), average daily gain QTL (5680), Fat-cuts percentage QTL (12727), PH for Longissmus dorsi QTL (3169), Backfat at rump QTL (21206), Loin muscle area QTL (38072), backfat above muscle dorsi QTL (5237), average da…
951	1	289183001	289189000	Average backfat thickness QTL (35), Fat to meat ratio QTL (12739), Drip loss QTL (8300), Lean meat percentage QTL (824), backfat at last rib QTL (3666), Average backfat thickness QTL (3145), average daily gain QTL (5680), Fat-cuts percentage QTL (12727), PH for Longissmus dorsi QTL (3169), Backfat at rump QTL (21206), Loin muscle area QTL (38072), backfat above muscle dorsi QTL (5237), average da…
952	1	290371501	290375500	Average backfat thickness QTL (35), Fat to meat ratio QTL (12739), Drip loss QTL (8300), Lean meat percentage QTL (824), backfat at last rib QTL (3666), Average backfat thickness QTL (3145), average daily gain QTL (5680), Fat-cuts percentage QTL (12727), PH for Longissmus dorsi QTL (3169), Loin muscle area QTL (38072), backfat above muscle dorsi QTL (5237), average daily gain QTL (448), Backfat w…
953	1	295935501	295939000	Average backfat thickness QTL (35), Drip loss QTL (8300), Average backfat thickness QTL (3145), PH for Longissmus dorsi QTL (3169), Backfat weight QTL (3149), Ham weight QTL (3148), Drip loss QTL (8131), Drip loss QTL (8323), body weight (17 weeks) QTL (662), Leaf fat weight QTL (402), Drip loss QTL (8382), Drip loss QTL (8564), backfat at last rib QTL (27), Drip loss QTL (80), Lean meat percenta…
954	1	298587001	298595000	Average backfat thickness QTL (35), Drip loss QTL (8300), Average backfat thickness QTL (3145), PH for Longissmus dorsi QTL (3169), Backfat weight QTL (3149), Ham weight QTL (3148), Drip loss QTL (8131), Drip loss QTL (8323), body weight (17 weeks) QTL (662), Leaf fat weight QTL (402), Drip loss QTL (8382), Drip loss QTL (8564), backfat at last rib QTL (27), Drip loss QTL (80), Lean meat percenta…
955	1	300609001	300616000	Average backfat thickness QTL (35), Drip loss QTL (8300), Average backfat thickness QTL (3145), PH for Longissmus dorsi QTL (3169), Backfat weight QTL (3149), Loin and ham percentage in carcass QTL (377), Ham weight QTL (3148), Drip loss QTL (8131), Drip loss QTL (8323), body weight (17 weeks) QTL (662), Leaf fat weight QTL (402), Drip loss QTL (8382), Drip loss QTL (8564), backfat at last rib QT…
956	1	308501001	308507000	Drip loss QTL (8300), Drip loss QTL (8131), Drip loss QTL (8323), Leaf fat weight QTL (402), Drip loss QTL (8382), Drip loss QTL (8564), Drip loss QTL (8063), Umbilical hernia QTL (8742), Drip loss QTL (8480), Drip loss QTL (7936), Percentage of backfat and leaf fat in carcass QTL (403), Ham weight QTL (376), Loin weight QTL (375), Drip loss QTL (8602)
957	1	308840001	308845500	Drip loss QTL (8300), Drip loss QTL (8131), Drip loss QTL (8323), Leaf fat weight QTL (402), Drip loss QTL (8382), Drip loss QTL (8564), Drip loss QTL (8063), Umbilical hernia QTL (8742), Drip loss QTL (8480), Drip loss QTL (7936), Percentage of backfat and leaf fat in carcass QTL (403), Ham weight QTL (376), Loin weight QTL (375), Drip loss QTL (8602)
958	1	313281501	313286000	Percentage of backfat and leaf fat in carcass QTL (403)
959	1	314411001	314420500	Percentage of backfat and leaf fat in carcass QTL (403)
960	1	314601001	314609000	Percentage of backfat and leaf fat in carcass QTL (403)
961	1	314603001	314618000	Percentage of backfat and leaf fat in carcass QTL (403)
962	1	314941001	314946000	Percentage of backfat and leaf fat in carcass QTL (403)
963	1	1202501	1216000
964	1	2586001	2595500
965	1	6521501	6527000	Loin muscle area QTL (38072), Body weight (birth) QTL (826), Loin muscle area QTL (21352), Marbling QTL (38049), Loin muscle area QTL (3221), Muscle moisture percentage QTL (38073), Glucose level QTL (15087), Diameter of angular fibers QTL (2793), Teat number QTL (276), Loin fat percentage QTL (38050)
966	1	8352001	8360500	Drip loss QTL (8081), average daily gain QTL (5680), Drip loss QTL (8628), indole, laboratory QTL (106214), Loin muscle area QTL (38072), Body weight (birth) QTL (826), Loin muscle area QTL (21352), Musculus gluteus weight QTL (1276), Non-return rate QTL (18535), Stearic acid content QTL (3111), Drip loss QTL (8295), Marbling QTL (38049), Shoulder subcutaneous fat thickness QTL (5671), Drip loss …
967	1	140428501	140441000	Drip loss QTL (8300), average daily gain QTL (5680), Potassium level QTL (6380), Backfat at rump QTL (17872), CD2-positive leukocyte number QTL (4260), pH for Semimembranosus QTL (5665), CIE-L* QTL (4326), Backfat at rump QTL (21206), Platelet distribution width QTL (12312), Loin muscle area QTL (38072), backfat above muscle dorsi QTL (5237), Ear weight QTL (8853), Backfat weight QTL (3171), Feed…
968	1	146624501	146628000	Drip loss QTL (8300), average daily gain QTL (5680), Potassium level QTL (6380), CD2-positive leukocyte number QTL (4260), pH for Semimembranosus QTL (5665), Backfat at rump QTL (21206), Platelet distribution width QTL (12312), Loin muscle area QTL (38072), backfat above muscle dorsi QTL (5237), Ear weight QTL (8853), Backfat weight QTL (3171), Feed intake QTL (871), White blood cell counts QTL (…
969	1	147040001	147044000	Drip loss QTL (8300), average daily gain QTL (5680), Potassium level QTL (6380), CD2-positive leukocyte number QTL (4260), pH for Semimembranosus QTL (5665), Backfat at rump QTL (21206), Platelet distribution width QTL (12312), Loin muscle area QTL (38072), backfat above muscle dorsi QTL (5237), Ear weight QTL (8853), Backfat weight QTL (3171), Feed intake QTL (871), White blood cell counts QTL (…
970	1	184503001	184514000	Daily feed intake QTL (141), Drip loss QTL (8300), Average backfat thickness QTL (4016), Backfat weight QTL (12724), average daily gain QTL (5680), Potassium level QTL (6380), Backfat at last lumbar QTL (4015), Litter size QTL (106223), CD2-positive leukocyte number QTL (4260), Side fat thickness QTL (5958), pH for Semimembranosus QTL (5665), Head weight QTL (432), Backfat at tenth rib QTL (138),…
971	1	235514501	235519000	Drip loss QTL (8300), average daily gain QTL (5680), average daily gain QTL (2847), Hind feet conformation QTL (8912), Gestation length QTL (10617), average daily gain QTL (2846), Backfat at rump QTL (21206), Platelet distribution width QTL (12312), Loin muscle area QTL (38072), average daily gain QTL (16887), backfat above muscle dorsi QTL (5237), Fat-cuts percentage QTL (855), Locomotion QTL (4…
972	1	284429501	284442000	Average backfat thickness QTL (35), Left teat number QTL (6463), Fat to meat ratio QTL (12739), Drip loss QTL (8300), Lean meat percentage QTL (824), Average backfat thickness QTL (3145), average daily gain QTL (5680), Fat-cuts percentage QTL (12727), PH for Longissmus dorsi QTL (3169), Backfat at rump QTL (21206), Vertebra number QTL (21301), Loin muscle area QTL (38072), backfat above muscle do…
973	1	284458501	284463000	Average backfat thickness QTL (35), Left teat number QTL (6463), Fat to meat ratio QTL (12739), Drip loss QTL (8300), Lean meat percentage QTL (824), Average backfat thickness QTL (3145), average daily gain QTL (5680), Fat-cuts percentage QTL (12727), PH for Longissmus dorsi QTL (3169), Backfat at rump QTL (21206), Vertebra number QTL (21301), Loin muscle area QTL (38072), backfat above muscle do…
974	1	304981001	304985000	Average backfat thickness QTL (35), Drip loss QTL (8300), Average backfat thickness QTL (3145), Platelet count QTL (107312), PH for Longissmus dorsi QTL (3169), Backfat weight QTL (3149), Loin and ham percentage in carcass QTL (377), Ham weight QTL (3148), Drip loss QTL (8131), Drip loss QTL (8323), body weight (17 weeks) QTL (662), Leaf fat weight QTL (402), Drip loss QTL (8382), Drip loss QTL (…
975	1	307488001	307493500	Drip loss QTL (8300), Fat weight (total) QTL (65021), Average backfat thickness QTL (735), Loin and ham percentage in carcass QTL (377), Drip loss QTL (7807), Loin muscle area QTL (759), Drip loss QTL (8131), Drip loss QTL (8323), Drip loss QTL (8068), Body weight (birth) QTL (719), body weight (17 weeks) QTL (662), Drip loss QTL (8064), Leaf fat weight QTL (402), Drip loss QTL (8164), Drip loss …
976	1	308777001	308782000	Drip loss QTL (8300), Drip loss QTL (8131), Drip loss QTL (8323), Leaf fat weight QTL (402), Drip loss QTL (8382), Drip loss QTL (8564), Drip loss QTL (8063), Umbilical hernia QTL (8742), Drip loss QTL (8480), Drip loss QTL (7936), Percentage of backfat and leaf fat in carcass QTL (403), Ham weight QTL (376), Loin weight QTL (375), Drip loss QTL (8602)
977	1	312587001	312591500	Percentage of backfat and leaf fat in carcass QTL (403)
978	1	939001	949500
979	1	1012001	1016500
980	1	1188501	1194000
981	1	1376501	1384000
982	1	1693501	1699000
983	1	2228001	2238000
984	1	2239001	2242500
985	1	3297501	3302000	Loin muscle area QTL (38072), Body weight (birth) QTL (826), Loin muscle area QTL (21352), Marbling QTL (38049), Loin muscle area QTL (3221), Muscle moisture percentage QTL (38073), Glucose level QTL (15087), Intramuscular fat content QTL (29590), Diameter of angular fibers QTL (2793), Teat number QTL (276), Loin fat percentage QTL (38050)
986	1	3513501	3520000	Loin muscle area QTL (38072), Body weight (birth) QTL (826), Loin muscle area QTL (21352), Marbling QTL (38049), Loin muscle area QTL (3221), Muscle moisture percentage QTL (38073), Glucose level QTL (15087), Intramuscular fat content QTL (29590), Diameter of angular fibers QTL (2793), Teat number QTL (276), Loin fat percentage QTL (38050)
987	1	5659501	5664000	Loin muscle area QTL (38072), Body weight (birth) QTL (826), Loin muscle area QTL (21352), Marbling QTL (38049), Loin muscle area QTL (3221), Muscle moisture percentage QTL (38073), Glucose level QTL (15087), Diameter of angular fibers QTL (2793), Teat number QTL (276), Loin fat percentage QTL (38050)
988	1	5695001	5700000	Loin muscle area QTL (38072), Body weight (birth) QTL (826), Loin muscle area QTL (21352), Marbling QTL (38049), Loin muscle area QTL (3221), Muscle moisture percentage QTL (38073), Glucose level QTL (15087), Diameter of angular fibers QTL (2793), Teat number QTL (276), Loin fat percentage QTL (38050)
989	1	7554501	7561500	Loin muscle area QTL (38072), Body weight (birth) QTL (826), Loin muscle area QTL (21352), Marbling QTL (38049), Loin muscle area QTL (3221), Muscle moisture percentage QTL (38073), Glucose level QTL (15087), Diameter of angular fibers QTL (2793), Teat number QTL (276), Loin fat percentage QTL (38050)
990	1	8337001	8343000	Drip loss QTL (8081), average daily gain QTL (5680), Drip loss QTL (8628), indole, laboratory QTL (106214), Loin muscle area QTL (38072), Body weight (birth) QTL (826), Loin muscle area QTL (21352), Musculus gluteus weight QTL (1276), Non-return rate QTL (18535), Stearic acid content QTL (3111), Drip loss QTL (8295), Marbling QTL (38049), Shoulder subcutaneous fat thickness QTL (5671), Drip loss …
991	1	11653501	11658000	average daily gain QTL (5680), Loin muscle area QTL (38072), Salmonella count in liver QTL (11554), CIE-a* QTL (28043), Body weight (birth) QTL (826), Loin muscle area QTL (21352), Stearic acid content QTL (3111), Marbling QTL (38049), Shoulder subcutaneous fat thickness QTL (5671), Loin muscle area QTL (3221), Muscle moisture percentage QTL (38073), average daily gain QTL (319), Stearic acid con…
992	1	14849501	14854500	average daily gain QTL (5680), Drip loss QTL (8043), Loin muscle area QTL (38072), Salmonella count in liver QTL (11554), Body weight (birth) QTL (826), Loin muscle area QTL (21352), Stearic acid content QTL (3111), Drip loss QTL (8349), Marbling QTL (38049), Drip loss QTL (8012), Shoulder subcutaneous fat thickness QTL (5671), Loin muscle area QTL (3221), Muscle moisture percentage QTL (38073), …
993	1	19089001	19092500	average daily gain QTL (5680), Drip loss QTL (8043), Loin muscle area QTL (38072), backfat above muscle dorsi QTL (5237), PH for Longissmus dorsi QTL (2787), backfat at last rib QTL (5674), Drip loss QTL (8349), Estimated carcass lean content QTL (5678), Marbling QTL (38049), Leaf fat weight QTL (3863), Drip loss QTL (8012), Shoulder subcutaneous fat thickness QTL (5671), average daily gain QTL (…
994	1	19712001	19719000	average daily gain QTL (5680), Drip loss QTL (8043), Loin muscle area QTL (38072), Drip loss QTL (8399), backfat above muscle dorsi QTL (5237), Drip loss QTL (7757), Drip loss QTL (8439), PH for Longissmus dorsi QTL (2787), Drip loss QTL (7735), backfat at last rib QTL (5674), Drip loss QTL (8349), Estimated carcass lean content QTL (5678), Marbling QTL (38049), Leaf fat weight QTL (3863), Drip l…
995	1	22283001	22291000	average daily gain QTL (5680), Drip loss QTL (8043), Loin muscle area QTL (38072), backfat above muscle dorsi QTL (5237), average daily gain QTL (338), White blood cell counts QTL (15047), PH for Longissmus dorsi QTL (2787), backfat at last rib QTL (5674), CIE-a* QTL (3980), Drip loss QTL (8349), Estimated carcass lean content QTL (5678), Marbling QTL (38049), Leaf fat weight QTL (3863), Drip los…
996	1	22831501	22840000	average daily gain QTL (5680), Drip loss QTL (8043), muscle protein percentage QTL (3838), Loin muscle area QTL (38072), backfat above muscle dorsi QTL (5237), average daily gain QTL (338), White blood cell counts QTL (15047), PH for Longissmus dorsi QTL (2787), backfat at last rib QTL (5674), CIE-a* QTL (3980), Drip loss QTL (8349), Estimated carcass lean content QTL (5678), Marbling QTL (38049)…
997	1	22850001	22855000	average daily gain QTL (5680), Drip loss QTL (8043), muscle protein percentage QTL (3838), Loin muscle area QTL (38072), backfat above muscle dorsi QTL (5237), average daily gain QTL (338), White blood cell counts QTL (15047), PH for Longissmus dorsi QTL (2787), backfat at last rib QTL (5674), CIE-a* QTL (3980), Drip loss QTL (8349), Estimated carcass lean content QTL (5678), Marbling QTL (38049)…
998	1	25753001	25761000	average daily gain QTL (5680), Drip loss QTL (8043), muscle protein percentage QTL (3838), Loin muscle area QTL (46), Loin muscle area QTL (38072), Carcass weight (hot) QTL (16896), backfat above muscle dorsi QTL (5237), average daily gain QTL (338), White blood cell counts QTL (15047), Daily feed intake QTL (66267), PH for Longissmus dorsi QTL (2787), backfat at last rib QTL (5674), CIE-a* QTL (…
999	1	26001001	26006000	average daily gain QTL (5680), Drip loss QTL (8043), muscle protein percentage QTL (3838), Loin muscle area QTL (46), Loin muscle area QTL (38072), Carcass weight (hot) QTL (16896), backfat above muscle dorsi QTL (5237), average daily gain QTL (338), White blood cell counts QTL (15047), Daily feed intake QTL (66267), PH for Longissmus dorsi QTL (2787), backfat at last rib QTL (5674), CIE-a* QTL (…
1000	1	26662501	26669500	average daily gain QTL (5680), Drip loss QTL (8043), muscle protein percentage QTL (3838), Loin muscle area QTL (46), Loin muscle area QTL (38072), Carcass weight (hot) QTL (16896), backfat above muscle dorsi QTL (5237), average daily gain QTL (338), White blood cell counts QTL (15047), Daily feed intake QTL (66267), PH for Longissmus dorsi QTL (2787), backfat at last rib QTL (5674), CIE-a* QTL (…
1001	1	26679001	26682500	average daily gain QTL (5680), Drip loss QTL (8043), muscle protein percentage QTL (3838), Loin muscle area QTL (46), Loin muscle area QTL (38072), Carcass weight (hot) QTL (16896), backfat above muscle dorsi QTL (5237), average daily gain QTL (338), White blood cell counts QTL (15047), Daily feed intake QTL (66267), PH for Longissmus dorsi QTL (2787), backfat at last rib QTL (5674), CIE-a* QTL (…
1002	1	26693001	26702000	average daily gain QTL (5680), Drip loss QTL (8043), muscle protein percentage QTL (3838), Loin muscle area QTL (46), Loin muscle area QTL (38072), Carcass weight (hot) QTL (16896), backfat above muscle dorsi QTL (5237), average daily gain QTL (338), White blood cell counts QTL (15047), Daily feed intake QTL (66267), PH for Longissmus dorsi QTL (2787), backfat at last rib QTL (5674), CIE-a* QTL (…
1003	1	27214001	27220000	average daily gain QTL (5680), Drip loss QTL (8043), muscle protein percentage QTL (3838), Loin muscle area QTL (46), Loin muscle area QTL (38072), Carcass weight (hot) QTL (16896), backfat above muscle dorsi QTL (5237), average daily gain QTL (338), White blood cell counts QTL (15047), Daily feed intake QTL (66267), Mean platelet volume QTL (107291), PH for Longissmus dorsi QTL (2787), backfat a…
1004	1	29099001	29105000	average daily gain QTL (5680), Drip loss QTL (8043), muscle protein percentage QTL (3838), Loin muscle area QTL (46), Loin muscle area QTL (38072), Carcass weight (hot) QTL (16896), backfat above muscle dorsi QTL (5237), average daily gain QTL (338), White blood cell counts QTL (15047), PH for Longissmus dorsi QTL (2787), backfat at last rib QTL (5674), CIE-a* QTL (3980), Drip loss QTL (8349), Es…
1005	1	33834501	33843500	average daily gain QTL (5680), Drip loss QTL (8043), muscle protein percentage QTL (3838), Loin muscle area QTL (46), Loin muscle area QTL (38072), Carcass weight (hot) QTL (16896), backfat above muscle dorsi QTL (5237), average daily gain QTL (338), White blood cell counts QTL (15047), PH for Longissmus dorsi QTL (2787), backfat at last rib QTL (5674), CIE-a* QTL (3980), Drip loss QTL (8349), Es…
1006	1	39177001	39183000	Drip loss QTL (7828), average daily gain QTL (5680), Drip loss QTL (8043), Estimated carcass lean content QTL (5960), muscle protein percentage QTL (3838), CD2-positive leukocyte number QTL (4260), Drip loss QTL (8597), Loin and neck meat weight QTL (807), Loin muscle area QTL (46), Carcass weight (cold) QTL (792), Loin muscle area QTL (38072), Carcass weight (cold) QTL (12710), Carcass weight (h…
1007	1	41868501	41877000	Drip loss QTL (7828), average daily gain QTL (5680), Drip loss QTL (8043), Estimated carcass lean content QTL (5960), muscle protein percentage QTL (3838), CD2-positive leukocyte number QTL (4260), Drip loss QTL (8597), Loin and neck meat weight QTL (807), Loin muscle area QTL (46), Carcass weight (cold) QTL (792), Loin muscle area QTL (38072), Carcass weight (cold) QTL (12710), Carcass weight (h…
1008	1	41901001	41905000	Drip loss QTL (7828), average daily gain QTL (5680), Drip loss QTL (8043), Estimated carcass lean content QTL (5960), muscle protein percentage QTL (3838), CD2-positive leukocyte number QTL (4260), Drip loss QTL (8597), Loin and neck meat weight QTL (807), Loin muscle area QTL (46), Carcass weight (cold) QTL (792), Loin muscle area QTL (38072), Carcass weight (cold) QTL (12710), Carcass weight (h…
1009	1	44367501	44379000	Drip loss QTL (7828), average daily gain QTL (5680), Drip loss QTL (8043), Estimated carcass lean content QTL (5960), muscle protein percentage QTL (3838), CD2-positive leukocyte number QTL (4260), Drip loss QTL (8597), Loin and neck meat weight QTL (807), Loin muscle area QTL (46), Carcass weight (cold) QTL (792), Backfat at rump QTL (21206), Loin muscle area QTL (38072), Carcass weight (cold) Q…
1010	1	44782501	44789500	Drip loss QTL (7828), average daily gain QTL (5680), Drip loss QTL (8043), Estimated carcass lean content QTL (5960), muscle protein percentage QTL (3838), CD2-positive leukocyte number QTL (4260), Drip loss QTL (8597), Loin and neck meat weight QTL (807), Loin muscle area QTL (46), Carcass weight (cold) QTL (792), Backfat at rump QTL (21206), Loin muscle area QTL (38072), Carcass weight (cold) Q…
1011	1	46285501	46292000	average daily gain QTL (5680), Drip loss QTL (8043), Estimated carcass lean content QTL (5960), muscle protein percentage QTL (3838), CD2-positive leukocyte number QTL (4260), Loin and neck meat weight QTL (807), Loin muscle area QTL (46), Carcass weight (cold) QTL (792), Backfat at rump QTL (21206), Loin muscle area QTL (38072), Carcass weight (cold) QTL (12710), Carcass weight (hot) QTL (16896)…
1012	1	46350001	46355000	average daily gain QTL (5680), Drip loss QTL (8043), Estimated carcass lean content QTL (5960), muscle protein percentage QTL (3838), CD2-positive leukocyte number QTL (4260), Loin and neck meat weight QTL (807), Loin muscle area QTL (46), Carcass weight (cold) QTL (792), Backfat at rump QTL (21206), Loin muscle area QTL (38072), Carcass weight (cold) QTL (12710), Carcass weight (hot) QTL (16896)…
1013	1	46388001	46394500	average daily gain QTL (5680), Drip loss QTL (8043), Estimated carcass lean content QTL (5960), muscle protein percentage QTL (3838), CD2-positive leukocyte number QTL (4260), Loin and neck meat weight QTL (807), Loin muscle area QTL (46), Carcass weight (cold) QTL (792), Backfat at rump QTL (21206), Loin muscle area QTL (38072), Carcass weight (cold) QTL (12710), Carcass weight (hot) QTL (16896)…
1014	1	49394501	49400000	average daily gain QTL (5680), Drip loss QTL (8043), Estimated carcass lean content QTL (5960), muscle protein percentage QTL (3838), CD2-positive leukocyte number QTL (4260), Loin and neck meat weight QTL (807), Loin muscle area QTL (46), Carcass weight (cold) QTL (792), Backfat at rump QTL (21206), Loin muscle area QTL (38072), Carcass weight (cold) QTL (12710), Carcass weight (hot) QTL (16896)…
1015	1	50665501	50672000	average daily gain QTL (5680), Drip loss QTL (8043), Estimated carcass lean content QTL (5960), muscle protein percentage QTL (3838), CD2-positive leukocyte number QTL (4260), Loin and neck meat weight QTL (807), Loin muscle area QTL (46), Carcass weight (cold) QTL (792), Backfat at rump QTL (21206), Loin muscle area QTL (38072), Carcass weight (cold) QTL (12710), Carcass weight (hot) QTL (16896)…
1016	1	51215501	51222000	average daily gain QTL (5680), Drip loss QTL (8043), Estimated carcass lean content QTL (5960), muscle protein percentage QTL (3838), CD2-positive leukocyte number QTL (4260), Loin and neck meat weight QTL (807), Loin muscle area QTL (46), Carcass weight (cold) QTL (792), Backfat at rump QTL (21206), Loin muscle area QTL (38072), Carcass weight (cold) QTL (12710), Carcass weight (hot) QTL (16896)…
1017	1	51705001	51711500	average daily gain QTL (5680), Drip loss QTL (8043), Estimated carcass lean content QTL (5960), muscle protein percentage QTL (3838), CD2-positive leukocyte number QTL (4260), Loin and neck meat weight QTL (807), Loin muscle area QTL (46), Carcass weight (cold) QTL (792), Backfat at rump QTL (21206), Loin muscle area QTL (38072), Carcass weight (cold) QTL (12710), Carcass weight (hot) QTL (16896)…
1018	1	51711001	51716000	average daily gain QTL (5680), Drip loss QTL (8043), Estimated carcass lean content QTL (5960), muscle protein percentage QTL (3838), CD2-positive leukocyte number QTL (4260), Loin and neck meat weight QTL (807), Loin muscle area QTL (46), Carcass weight (cold) QTL (792), Backfat at rump QTL (21206), Loin muscle area QTL (38072), Carcass weight (cold) QTL (12710), Carcass weight (hot) QTL (16896)…
1019	1	51885501	51891500	average daily gain QTL (5680), Drip loss QTL (8043), Estimated carcass lean content QTL (5960), muscle protein percentage QTL (3838), CD2-positive leukocyte number QTL (4260), Loin and neck meat weight QTL (807), Loin muscle area QTL (46), Carcass weight (cold) QTL (792), Backfat at rump QTL (21206), Loin muscle area QTL (38072), Carcass weight (cold) QTL (12710), Carcass weight (hot) QTL (16896)…
1020	1	51919001	51925500	average daily gain QTL (5680), Drip loss QTL (8043), Estimated carcass lean content QTL (5960), muscle protein percentage QTL (3838), CD2-positive leukocyte number QTL (4260), Loin and neck meat weight QTL (807), Loin muscle area QTL (46), Carcass weight (cold) QTL (792), Backfat at rump QTL (21206), Loin muscle area QTL (38072), Carcass weight (cold) QTL (12710), Carcass weight (hot) QTL (16896)…
1021	1	52488501	52499500	average daily gain QTL (5680), Drip loss QTL (8043), Estimated carcass lean content QTL (5960), muscle protein percentage QTL (3838), CD2-positive leukocyte number QTL (4260), Drip loss QTL (7794), Loin and neck meat weight QTL (807), Loin muscle area QTL (46), Carcass weight (cold) QTL (792), Backfat at rump QTL (21206), Drip loss QTL (8254), Loin muscle area QTL (38072), Carcass weight (cold) Q…
1022	1	53768501	53774500	average daily gain QTL (5680), Drip loss QTL (8043), Estimated carcass lean content QTL (5960), CD2-positive leukocyte number QTL (4260), Backfat at rump QTL (21206), Loin muscle area QTL (38072), backfat above muscle dorsi QTL (5237), Feed intake QTL (871), White blood cell counts QTL (15047), backfat at last rib QTL (5674), Marbling QTL (4019), Head weight QTL (860), Drip loss QTL (8349), Estim…
1023	1	54376001	54384000	average daily gain QTL (5680), Drip loss QTL (8043), Estimated carcass lean content QTL (5960), CD2-positive leukocyte number QTL (4260), Backfat at rump QTL (21206), Loin muscle area QTL (38072), backfat above muscle dorsi QTL (5237), Feed intake QTL (871), White blood cell counts QTL (15047), backfat at last rib QTL (5674), Marbling QTL (4019), Head weight QTL (860), Drip loss QTL (8349), Estim…
1024	1	57173501	57179500	Daily feed intake QTL (22384), average daily gain QTL (5680), Drip loss QTL (8043), Daily feed intake QTL (22387), Estimated carcass lean content QTL (5960), CD2-positive leukocyte number QTL (4260), Backfat at rump QTL (21206), Loin muscle area QTL (38072), backfat above muscle dorsi QTL (5237), Daily feed intake QTL (22370), Feed intake QTL (871), White blood cell counts QTL (15047), Daily feed…
1025	1	66924001	66933500	Drip loss QTL (7737), Drip loss QTL (7956), Liver weight QTL (13265), average daily gain QTL (5680), Drip loss QTL (8043), Potassium level QTL (6380), Estimated carcass lean content QTL (5960), CD2-positive leukocyte number QTL (4260), backfat at P2 position QTL (4107), average daily gain QTL (3673), Backfat at rump QTL (21206), Loin muscle area QTL (38072), backfat above muscle dorsi QTL (5237),…
1026	1	67747001	67751500	Drip loss QTL (7737), Drip loss QTL (7956), Liver weight QTL (13265), average daily gain QTL (5680), Drip loss QTL (8043), Potassium level QTL (6380), Estimated carcass lean content QTL (5960), CD2-positive leukocyte number QTL (4260), backfat at P2 position QTL (4107), average daily gain QTL (3673), Backfat at rump QTL (21206), Loin muscle area QTL (38072), backfat above muscle dorsi QTL (5237),…
1027	1	68065001	68070500	Liver weight QTL (13265), average daily gain QTL (5680), Drip loss QTL (8043), Potassium level QTL (6380), Estimated carcass lean content QTL (5960), CD2-positive leukocyte number QTL (4260), backfat at P2 position QTL (4107), average daily gain QTL (3673), Backfat at rump QTL (21206), Loin muscle area QTL (38072), backfat above muscle dorsi QTL (5237), Feed intake QTL (871), White blood cell cou…
1028	1	68518001	68525000	Liver weight QTL (13265), average daily gain QTL (5680), Drip loss QTL (8043), Potassium level QTL (6380), Estimated carcass lean content QTL (5960), CD2-positive leukocyte number QTL (4260), backfat at P2 position QTL (4107), average daily gain QTL (3673), Backfat at rump QTL (21206), Loin muscle area QTL (38072), backfat above muscle dorsi QTL (5237), Feed intake QTL (871), White blood cell cou…
1029	1	68548001	68555000	Liver weight QTL (13265), average daily gain QTL (5680), Drip loss QTL (8043), Potassium level QTL (6380), Estimated carcass lean content QTL (5960), CD2-positive leukocyte number QTL (4260), backfat at P2 position QTL (4107), average daily gain QTL (3673), Backfat at rump QTL (21206), Loin muscle area QTL (38072), backfat above muscle dorsi QTL (5237), Feed intake QTL (871), White blood cell cou…
1030	1	68578501	68586000	Liver weight QTL (13265), average daily gain QTL (5680), Drip loss QTL (8043), Potassium level QTL (6380), Estimated carcass lean content QTL (5960), CD2-positive leukocyte number QTL (4260), backfat at P2 position QTL (4107), average daily gain QTL (3673), Backfat at rump QTL (21206), Loin muscle area QTL (38072), backfat above muscle dorsi QTL (5237), Feed intake QTL (871), White blood cell cou…
1031	1	68618001	68623000	Liver weight QTL (13265), average daily gain QTL (5680), Drip loss QTL (8043), Potassium level QTL (6380), Estimated carcass lean content QTL (5960), CD2-positive leukocyte number QTL (4260), backfat at P2 position QTL (4107), average daily gain QTL (3673), Backfat at rump QTL (21206), Loin muscle area QTL (38072), backfat above muscle dorsi QTL (5237), Feed intake QTL (871), White blood cell cou…
1032	1	68784501	68790000	Liver weight QTL (13265), average daily gain QTL (5680), Drip loss QTL (8043), Potassium level QTL (6380), Estimated carcass lean content QTL (5960), CD2-positive leukocyte number QTL (4260), backfat at P2 position QTL (4107), average daily gain QTL (3673), Backfat at rump QTL (21206), Loin muscle area QTL (38072), backfat above muscle dorsi QTL (5237), Feed intake QTL (871), White blood cell cou…
1033	1	69406501	69413000	Liver weight QTL (13265), average daily gain QTL (5680), Drip loss QTL (8043), Potassium level QTL (6380), Estimated carcass lean content QTL (5960), CD2-positive leukocyte number QTL (4260), backfat at P2 position QTL (4107), average daily gain QTL (3673), Backfat at rump QTL (21206), Loin muscle area QTL (38072), backfat above muscle dorsi QTL (5237), Feed intake QTL (871), White blood cell cou…
1034	1	70695001	70699500	Liver weight QTL (13265), average daily gain QTL (5680), Drip loss QTL (8043), Potassium level QTL (6380), Estimated carcass lean content QTL (5960), CD2-positive leukocyte number QTL (4260), backfat at P2 position QTL (4107), average daily gain QTL (3673), Backfat at rump QTL (21206), Loin muscle area QTL (38072), backfat above muscle dorsi QTL (5237), Feed intake QTL (871), White blood cell cou…
1035	1	71518001	71521500	Liver weight QTL (13265), average daily gain QTL (5680), Drip loss QTL (8043), Potassium level QTL (6380), Estimated carcass lean content QTL (5960), CD2-positive leukocyte number QTL (4260), backfat at P2 position QTL (4107), average daily gain QTL (3673), Backfat at rump QTL (21206), Loin muscle area QTL (38072), backfat above muscle dorsi QTL (5237), Feed intake QTL (871), White blood cell cou…
1036	1	71733001	71739500	Liver weight QTL (13265), average daily gain QTL (5680), Drip loss QTL (8043), Potassium level QTL (6380), Estimated carcass lean content QTL (5960), CD2-positive leukocyte number QTL (4260), backfat at P2 position QTL (4107), average daily gain QTL (3673), Backfat at rump QTL (21206), Loin muscle area QTL (38072), backfat above muscle dorsi QTL (5237), Feed intake QTL (871), White blood cell cou…
1037	1	73043501	73048000	Liver weight QTL (13265), average daily gain QTL (5680), Drip loss QTL (8043), Potassium level QTL (6380), Estimated carcass lean content QTL (5960), CD2-positive leukocyte number QTL (4260), backfat at P2 position QTL (4107), average daily gain QTL (3673), Backfat at rump QTL (21206), Loin muscle area QTL (38072), backfat above muscle dorsi QTL (5237), Feed intake QTL (871), White blood cell cou…
1038	1	76264001	76270500	Liver weight QTL (13265), average daily gain QTL (5680), Drip loss QTL (8043), Potassium level QTL (6380), Estimated carcass lean content QTL (5960), CD2-positive leukocyte number QTL (4260), backfat at P2 position QTL (4107), average daily gain QTL (3673), Backfat at rump QTL (21206), Loin muscle area QTL (38072), backfat above muscle dorsi QTL (5237), Feed intake QTL (871), White blood cell cou…
1039	1	78452001	78458500	Liver weight QTL (13265), average daily gain QTL (5680), Drip loss QTL (8043), Potassium level QTL (6380), Estimated carcass lean content QTL (5960), CD2-positive leukocyte number QTL (4260), backfat at P2 position QTL (4107), average daily gain QTL (3673), Backfat at rump QTL (21206), Loin muscle area QTL (38072), backfat above muscle dorsi QTL (5237), Feed intake QTL (871), White blood cell cou…
1040	1	78642501	78647500	average daily gain QTL (5680), Drip loss QTL (8043), Potassium level QTL (6380), Estimated carcass lean content QTL (5960), CD2-positive leukocyte number QTL (4260), backfat at P2 position QTL (4107), average daily gain QTL (3673), Backfat at rump QTL (21206), Loin muscle area QTL (38072), backfat above muscle dorsi QTL (5237), Feed intake QTL (871), White blood cell counts QTL (15047), backfat a…
1041	1	80266001	80273000	average daily gain QTL (5680), Drip loss QTL (8043), Potassium level QTL (6380), Estimated carcass lean content QTL (5960), CD2-positive leukocyte number QTL (4260), backfat at P2 position QTL (4107), average daily gain QTL (3673), Backfat at rump QTL (21206), Loin muscle area QTL (38072), backfat above muscle dorsi QTL (5237), Feed intake QTL (871), White blood cell counts QTL (15047), backfat a…
[truncated: 26,543 more rows]

## Sheet: B
QTL Type	# CNVR/QTL Overlaps	# QTL in Database	QTL Enrichment Adjusted P-value
[truncated: 525 more rows]
