# Supplementary material for: A Survey of Copy Number Variation in the Porcine Genome Detected From Whole-Genome Sequence
Source: Front Genet. 2019 Aug 16;10:737. doi: 10.3389/fgene.2019.00737 (PMC6707380; doi:10.3389/fgene.2019.00737)
Supplement: Table S8 — Results from QTL enrichment analysis using previously identified QTL in the USMARC swine population. [file Table_8.xlsx]

## Sheet: A
QTL Type (Genomic Position)	CNVR Overlapped
age of puberty (SSC1:12068336-12170343)	299	418	429	733	864	883
age of puberty (SSC1:38161770-38448574)	25	105	1000
age of puberty (SSC1:135202244-137459933)	775	868	935	955	1054	1108	1114
age of puberty (SSC1:261928982-262303007)	243
age of puberty (SSC1:262523144-263563010)	94	459	565	621	674	963
age of puberty (SSC2:14973508-15066021)	1282
age of puberty (SSC3:24013595-24365366)	1493
age of puberty (SSC3:24614703-24903007)	1431	1450	1451
age of puberty (SSC3:121804375-122061023)	1489
age of puberty (SSC5:62134658-62481418)	1665
age of puberty (SSC6:45535033-45744000)	1866	1906
age of puberty (SSC6:121662008-123040554)	1897	1915
age of puberty (SSC6:137394009-137682936)	1900
age of puberty (SSC7:40581808-40774812)	2066
age of puberty (SSC7:43935081-44101951)	2025	2031
age of puberty (SSC7:49019422-49184640)	2010	2051	2052	2055	2084
age of puberty (SSC7:62258860-62376081)	2039
age of puberty (SSC7:66653132-67048149)	1991
age of puberty (SSC7:74405457-74546893)	1992
age of puberty (SSC8:15500461-15645626)	2236
age of puberty (SSC8:29717666-29888983)	2259
age of puberty (SSC8:67975254-68650683)	2187	2210	2211
age of puberty (SSC8:100809887-101073242)	2249
age of puberty (SSC9:9557281-9658641)	2396
age of puberty (SSC10:31540725-31884013)	2524	2525
age of puberty (SSC13:24080889-24188583)	2832
age of puberty (SSC13:88123513-88373273)	2825
age of puberty (SSC13:88403344-89084312)	2758
age of puberty (SSC13:192149514-192456874)	2839	2856	2857
age of puberty (SSC14:22265544-22732687)	3043
age of puberty (SSC14:127119829-127448730)	2975
age of puberty (SSC14:139023317-139122340)	2996
age of puberty (SSC15:47339858-47557396)	3087	3181
age of puberty (SSC15:116841511-116961821)	3166
age of puberty (SSC16:4506994-4672224)	3251
age of puberty (SSC16:72355823-72484107)	3277
age of puberty (SSC18:22441012-22671231)	3424
age of puberty (SSC18:51581910-51926206)	3398	3401
age of puberty (SSCX:23629273-23790895)	3463
age of puberty (SSCX:24403605-24902929)	3477	3478
age of puberty (SSCX:33913266-34100122)	3469
litter average birth interval minus last birth (SSC1:49835408-50726631)	392	398	530	573	600	615	790	838	926	965	1120	1211
litter average birth interval minus last birth (SSC1:61207168-62017703)	170	385	446	718	894	1026	1063	1064
litter average birth interval minus last birth (SSC1:51659892-52662592)	82	285	558	691	717	969	1086	1139	1188
litter average birth interval minus last birth (SSC1:89882281-91002709)	312	313	793	890	971	972
litter average birth interval minus last birth (SSC1:32603225-33470048)	202	265	512	513	597	628	684	726	810	903	986	1123
litter average birth interval minus last birth (SSC1:55503328-56256233)	145	201	343	593	626	663	671	1088	1183
litter average birth interval minus last birth (SSC1:65479986-66129433)	723	1003	1011
litter average birth interval minus last birth (SSC8:133520516-134696901)	2197	2266
litter average birth interval minus last birth (SSC1:48908692-49835406)	155	156	198	520	662	741	1190	1200
litter average birth interval minus last birth (SSC14:40532537-41483246)	2939
litter average birth interval minus last birth (SSC1:62017705-62861035)	211	582	751	1029
litter average birth interval minus last birth (SSC3:32163842-33242631)	1432
litter average birth interval minus last birth (SSC15:119211269-119812420)	3158
litter average birth interval minus last birth (SSC13:48258520-49059926)	2711
litter average birth interval minus last birth (SSC14:3125923-4635294)	2965	2981	3031	3047
last birth interval (SSCX:33358407-34190332)	3469
last birth interval (SSC13:50865905-51651636)	2728	2764
last birth interval (SSC2:136473780-137493147)	1357
last birth interval (SSC13:12387720-13453849)	2852	2868
last birth interval (SSC8:15702131-16678269)	2110
last birth interval (SSC1:30432951-31140684)	402	467	575	934	1109	1149	1222
last birth interval (SSC11:74622366-75585139)	2622	2632
last birth interval (SSC14:86139671-87092425)	2960
last birth interval (SSC7:24800579-25529387)	2008	2014	2041
last birth interval (SSC1:254806815-255696999)	929
last birth interval (SSC13:16967788-17904720)	2921
last birth interval (SSC16:74799570-75640493)	3221	3297
last birth interval (SSC13:24645268-25401876)	2736
last birth interval (SSC9:90582703-91505477)	2340
last birth interval (SSC10:43356764-44199355)	2475	2515
last birth interval (SSC7:27573192-28524147)	1983
last birth interval (SSC1:57222622-58005076)	169	362	369	370	442	491	665	1221
# stillborn ignoring last piglet (SSC15:74981419-75520106)	3107
# stillborn ignoring last piglet (SSC15:21746256-22571550)	3196	3197
# stillborn ignoring last piglet (SSC15:126364803-127212373)	3192
# stillborn ignoring last piglet (SSC15:20962555-21664291)	3098
# stillborn ignoring last piglet (SSC11:10946870-12101891)	2558	2587
# stillborn ignoring last piglet (SSC7:30339323-31174131)	2076
# stillborn ignoring last piglet (SSC9:137983877-138792794)	2347	2348	2433
# stillborn ignoring last piglet (SSC7:76716000-77658502)	2013	2045	2050	2089
# stillborn ignoring last piglet (SSC15:75879633-76797454)	3066	3120
# stillborn ignoring last piglet (SSC15:74070171-74977878)	3106
# stillborn ignoring last piglet (SSC7:17038407-18039255)	2087
# stillborn ignoring last piglet (SSC14:54082725-55024949)	2957	3035
# stillborn ignoring last piglet (SSC7:90693157-91692067)	2002
# stillborn in last birth position (SSC9:117257258-118350058)	2415	2468
# stillborn in last birth position (SSC13:50865905-51651636)	2728	2764
# stillborn in last birth position (SSC2:122834994-123531451)	1350
# stillborn in last birth position (SSC13:48258520-49059926)	2711
# stillborn in last birth position (SSC5:13147755-13997229)	1747
# stillborn in last birth position (SSC11:28964215-29691314)	2579	2588
# stillborn in last birth position (SSC13:79356843-80332969)	2780
# stillborn in last birth position (SSC1:83460699-84440769)	792	1148
# stillborn in last birth position (SSC3:61932905-62878719)	1455	1486
# stillborn in last birth position (SSC9:132914558-133803218)	2346	2385
# stillborn in last birth position (SSC14:23534492-24452668)	2973
# stillborn in last birth position (SSC4:72543449-73429312)	1550	1658
# stillborn in last birth position (SSC1:14586104-15872212)	23	316	354	409	496	557	578	669	683	742	743	777	856	990	1013	1014	1022	1090	1202
# stillborn in last birth position (SSC3:54412324-55448527)	1425	1512
# stillborn in last birth position (SSC1:67218641-68175101)	53	109	412	431	476	989
# stillborn in last birth position (SSC3:82562974-83415803)	1426	1519
% stillborn ignoring last piglet (SSC15:20962555-21664291)	3098
% stillborn ignoring last piglet (SSC15:74070171-74977878)	3106
% stillborn ignoring last piglet (SSC7:17038407-18039255)	2087
% stillborn ignoring last piglet (SSC15:74981419-75520106)	3107
% stillborn ignoring last piglet (SSC15:70198199-71054757)	3184
% stillborn ignoring last piglet (SSC8:92922770-93763716)	2159	2165
% stillborn ignoring last piglet (SSC15:66764520-67674868)	3065
% stillborn ignoring last piglet (SSC11:43778529-44540982)	2598
% stillborn ignoring last piglet (SSC13:26335096-27171264)	2891
% stillborn ignoring last piglet (SSC14:54082725-55024949)	2957	3035
% stillborn ignoring last piglet (SSC1:48908692-49835406)	155	156	198	520	662	741	1190	1200
% stillborn ignoring last piglet (SSC11:10946870-12101891)	2558	2587
% stillborn ignoring last piglet (SSC13:71407690-72482214)	2713
% stillborn ignoring last piglet (SSC15:21746256-22571550)	3196	3197
% stillborn ignoring last piglet (SSC7:46278111-47083196)	1994
% stillborn ignoring last piglet (SSC13:47280593-48258518)	2859
% stillborn ignoring last piglet (SSC1:49835408-50726631)	392	398	530	573	600	615	790	838	926	965	1120	1211
% stillborn ignoring last piglet (SSC17:1154840-2146921)	3338	3362	3366
total number born (SSC1:76420432-76730997)	432
total number born (SSC13:70963220-71307054)	2779
number born alive (SSC1:76645316-76730997)	432
number born alive (SSC1:138177539-138286140)	122	713
number born alive (SSC6:76230893-76465828)	1871
number born alive (SSC13:70963220-71307054)	2779
litter birth weight (SSC1:76645316-76730997)	432
litter birth weight (SSC1:181787606-181947333)	18
litter birth weight (SSC15:66764520-67604963)	3065
litter birth weight (SSC15:111966676-112132925)	3127
litter birth weight (SSC15:112313155-112749902)	3129	3140
average piglet birth weight (SSC1:14760000-14960000)	1013	1090
average piglet birth weight (SSC1:15530000-15700000)	316	354	777	856
average piglet birth weight (SSC5:20640000-20810000)	1681	1682	1777
average piglet birth weight (SSC5:66710000-66880000)	1772
average piglet birth weight (SSC6:29520000-29700000)	1876
average piglet birth weight (SSC13:184570000-184730000)	2734	2811
average piglet birth weight (SSC14:2010000-2170000)	3034
average piglet birth weight (SSC15:15970000-16130000)	3084	3130	3164
average piglet birth weight (SSC18:290000-3090000)	3407	3434	3439
THI comparison normal-alert (SSC5:68000000-68999999)	1799
THI comparison normal-alert (SSC17:2000000-2999999)	3348	3369	3371
THI comparison normal-alert (SSC13:85000000-85999999)	2916	2923
THI comparison normal-alert (SSC13:17000000-17999999)	2921
THI comparison normal-alert (SSC17:3000000-3999999)	3337	3342	3379
THI comparison normal-alert (SSCX:3000000-3999999)	3472	3493
THI comparison normal-danger (SSC1:22000000-22999999)	81	111	231	384	423	568	645	715	722	734	820	995	1024	1155	1156
THI comparison normal-danger (SSC13:77000000-77999999)	2885
THI comparison normal-danger (SSC7:45000000-45999999)	1977
THI comparison normal-emergency (SSC12:12000000-12999999)	2701
THI comparison normal-emergency (SSC13:17000000-17999999)	2921
THI comparison normal-emergency (SSCX:3000000-3999999)	3472	3493
THI comparison normal-emergency (SSC2:10000000-10999999)	1380
THI comparison normal-emergency (SSC18:39000000-39999999)	3436	3442
THI comparison normal-emergency (SSC13:203000000-203999999)	2735	2781
THI comparison alert-danger (SSC1:227000000-227999999)	960
THI comparison alert-danger (SSC15:30000000-30999999)	3169
THI comparison alert-danger (SSC12:12000000-12999999)	2701
THI comparison alert-danger (SSC17:4000000-4999999)	3367	3372	3373	3374
THI comparison alert-emergency (SSC1:15000000-15999999)	23	260	316	354	409	557	578	654	669	742	743	777	856	990	1014	1022	1202
THI comparison alert-emergency (SSC12:12000000-12999999)	2701
THI comparison alert-emergency (SSC15:30000000-30999999)	3169
THI comparison danger-emergency (SSC1:15000000-15999999)	23	260	316	354	409	557	578	654	669	742	743	777	856	990	1014	1022	1202
THI comparison danger-emergency (SSC15:117000000-117999999)	3109
ovulation rate (SSC1:15050000-15230000)	669	990	1022	1202
ovulation rate (SSC1:15980000-16100000)	164	527	884
ovulation rate (SSC1:16140000-16220000)	561	933	943
ovulation rate (SSC1:202760000-203050000)	482
ovulation rate (SSC1:204990000-205310000)	474
ovulation rate (SSC2:133410000-133590000)	1235
ovulation rate (SSC2:137290000-137630000)	1357
ovulation rate (SSC5:68410000-68570000)	1799
ovulation rate (SSC7:10900000-11140000)	1960
ovulation rate (SSC8:10720000-10990000)	2139	2232
ovulation rate (SSC8:22900000-23190000)	2275
ovulation rate (SSC9:61780000-61960000)	2307
ovulation rate (SSC9:62690000-62750000)	2308	2387
ovulation rate (SSC9:63420000-63640000)	2425
ovulation rate (SSC10:6340000-6650000)	2474
ovulation rate (SSC10:17380000-17950000)	2546	2547
ovulation rate (SSC14:100000-440000)	2956
ovulation rate (SSC16:36470000-36750000)	3272
vertebra number (SSC4:114000000-114999999)	1563	1594	1600	1619	1620
vertebra number (SSC5:1000000-1999999)	1731
vertebra number (SSC5:70000000-70999999)	1716	1717
vertebra number (SSC5:102000000-102999999)	1668	1746
vertebra number (SSC6:81000000-81999999)	1884	1928
vertebra number (SSC6:102000000-102999999)	1849
vertebra number (SSC7:5000000-5999999)	1999
vertebra number (SSC7:54000000-54999999)	2038
vertebra number (SSC7:119000000-119999999)	2088	2094
vertebra number (SSC8:93000000-93999999)	2159	2165
vertebra number (SSC8:98000000-98999999)	2103	2131
vertebra number (SSC9:14000000-14999999)	2318
vertebra number (SSC9:121000000-121999999)	2428
vertebra number (SSC9:124000000-124999999)	2350	2383	2437	2444
vertebra number (SSC10:3000000-3999999)	2480	2486	2505	2526	2531	2536
vertebra number (SSC12:19000000-19999999)	2659
vertebra number (SSC12:24000000-24999999)	2681
vertebra number (SSC12:27000000-27999999)	2660	2661	2691	2698
vertebra number (SSC12:34000000-34999999)	2656
vertebra number (SSC14:49000000-49999999)	2951
vertebra number (SSC14:75000000-75999999)	3044
vertebra number (SSC15:30000000-30999999)	3169
vertebra number (SSC16:18000000-18999999)	3327
vertebra number (SSC16:19000000-19999999)	3223	3224	3228	3291	3302	3306	3320
vertebra number (SSC16:29000000-29999999)	3284	3285	3304
vertebra number (SSC18:8000000-8999999)	3440	3441
vertebra number (SSC18:51000000-51999999)	3398	3401
vertebra number (SSCX:41000000-41999999)	3514
kyphosis (SSC2:7000000-7999999)	1334
kyphosis (SSC2:12000000-12999999)	1249	1281	1360	1409
kyphosis (SSC5:72000000-72999999)	1740	1800
kyphosis (SSC5:73000000-73999999)	1755	1780
kyphosis (SSC6:60000000-60999999)	1869
kyphosis (SSC6:105000000-105999999)	1880	1890
kyphosis (SSC8:96000000-96999999)	2154
kyphosis (SSC13:145000000-145999999)	2928
kyphosis (SSC16:63000000-63999999)	3245
kyphosis (SSCX:5000000-5999999)	3494	3495	3508	3511	3512	3516
kyphosis (SSCX:39000000-39999999)	3473

## Sheet: B
QTL Type	# CNVR/QTL Overlaps	# Previously Reported QTL	QTL Enrichment Adjusted P-value
vertebra number	28	49	4.35384e-07
% stillborn ignoring last piglet	18	25	4.63665e-07
last birth interval	17	25	2.78974e-06
# stillborn in last birth position	16	25	1.58423e-05
litter average birth interval minus last birth	15	25	8.12874e-05
kyphosis	11	16	0.000148981
# stillborn ignoring last piglet	13	25	0.00148995
THI comparison normal-emergency	6	13	0.0866157
THI comparison alert-emergency	3	6	0.23227
THI comparison normal-alert	6	17	0.271318
average piglet birth weight	9	65	0.274907
THI comparison danger-emergency	2	4	0.289818
age of puberty	41	222	0.289818
THI comparison alert-danger	4	13	0.614199
number born alive	4	14	0.614199
litter birth weight	5	33	0.614199
ovulation rate	18	96	0.672264
THI comparison normal-danger	3	13	0.782161
total number born	2	11	1
